# Supplementary material
Source: PubMed Central journal article supplement (PMC8764269)
Supplement: mmc1.pdf [file mmc1.pdf]

**The American Journal of Human Genetics, Volume 109**

**Supplemental information**

**Longer CAG repeat length is associated  
with shorter survival after disease onset  
in Huntington disease**

**Douglas R. Langbehn and for the Registry Investigators of the European Huntington  
Disease Network**

Figure S1. ZPH proportional hazard goodness of fit test results

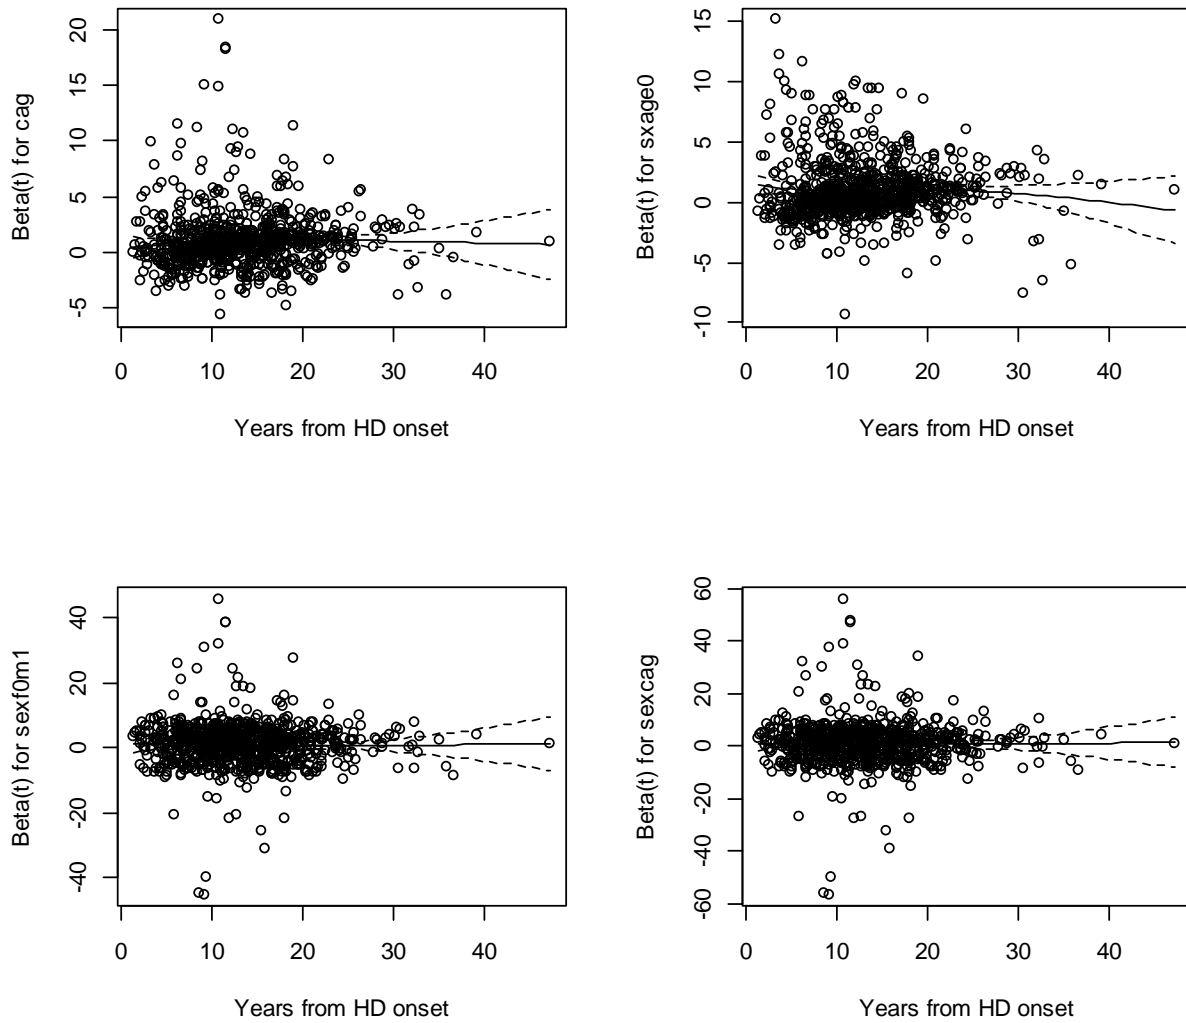

Abbreviations: *cag* = main effect of CAG length, *sxage0* = Joint effect of 3 degree-of-freedom restricted cubic spline fit of age-at-onset; *sexf0m1* = main effect of men vs women; *sexcag* = interaction of CAG and men vs women.

The near linearity of the Beta(t) coefficients, especially up to 30 years from HD onset, indicate good fit of the proportional hazards assumptions in the main model (Table 2 of the paper).

Supplemental Table 1. ZPH Proportional Hazard Goodness-of-fit for the final model

| <b>Variables</b>       | <b>rho</b> | <b>Chi-square</b> | <b>p</b> |
|------------------------|------------|-------------------|----------|
| CAG Main Effect        | 0.0355     | 0.883             | 0.347    |
| Age of HD Onset (3 df) | -0.0235    | 0.442             | 0.506    |
| Men vs Women           | -0.0191    | 0.278             | 0.598    |
| CAG by (M vs W)        | -0.0112    | 0.096             | 0.757    |

*p* = p value. (Also see Supplemental Figure 1.)

Supplemental Table 2. Frequency of CAG Lengths in 5-Year Windows Surrounding Plotted Ages in Figures 1 and 2 (Main Text)

Age 23-27

|     | 39 | 40 | 41 | 42 | 43 | 44 | 45 | 46 | 47 | 48 | 49 | 50 | 51 | 52 | 53 | 54 | 55 | 56 | 57 | 58 | 59 | 60 | 62 | 63 | 63 | tot |
|-----|----|----|----|----|----|----|----|----|----|----|----|----|----|----|----|----|----|----|----|----|----|----|----|----|----|-----|
| F   | 1  | 0  | 3  | 2  | 5  | 7  | 8  | 15 | 17 | 12 | 20 | 25 | 15 | 15 | 22 | 18 | 12 | 8  | 6  | 3  | 5  | 2  | 2  | 0  | 0  | 223 |
| M   | 0  | 1  | 3  | 3  | 6  | 5  | 10 | 8  | 11 | 15 | 18 | 25 | 15 | 13 | 15 | 8  | 7  | 3  | 3  | 1  | 2  | 1  | 3  | 1  | 1  | 178 |
| tot | 1  | 1  | 6  | 5  | 11 | 12 | 18 | 23 | 28 | 27 | 38 | 50 | 30 | 28 | 37 | 26 | 19 | 11 | 9  | 4  | 7  | 3  | 5  | 1  | 1  | 401 |

Age 33-37

|     | 36 | 38 | 39 | 40 | 41 | 42 | 43 | 44  | 45  | 46  | 47  | 48 | 49 | 50 | 51 | 52 | 53 | 54 | 55 | 56 | 58 | 68 | tot |
|-----|----|----|----|----|----|----|----|-----|-----|-----|-----|----|----|----|----|----|----|----|----|----|----|----|-----|
| F   | 2  | 1  | 2  | 5  | 7  | 22 | 38 | 44  | 69  | 100 | 82  | 43 | 37 | 22 | 10 | 3  | 0  | 3  | 0  | 0  | 0  | 0  | 490 |
| M   | 0  | 0  | 2  | 5  | 8  | 22 | 35 | 63  | 64  | 75  | 79  | 48 | 38 | 22 | 11 | 2  | 1  | 0  | 2  | 1  | 1  | 1  | 480 |
| tot | 2  | 1  | 4  | 10 | 15 | 44 | 73 | 107 | 133 | 175 | 161 | 91 | 75 | 44 | 21 | 5  | 1  | 3  | 2  | 1  | 1  | 1  | 970 |

Age 43-47

|     | 37 | 38 | 39 | 40 | 41 | 42  | 43  | 44  | 45  | 46 | 47 | 48 | 49 | 50 | 51 | 57 | tot  |
|-----|----|----|----|----|----|-----|-----|-----|-----|----|----|----|----|----|----|----|------|
| F   | 3  | 4  | 5  | 11 | 40 | 106 | 118 | 166 | 101 | 44 | 27 | 11 | 4  | 0  | 2  | 0  | 642  |
| M   | 1  | 2  | 8  | 11 | 28 | 108 | 154 | 142 | 80  | 34 | 18 | 7  | 5  | 3  | 0  | 1  | 602  |
| tot | 4  | 6  | 13 | 22 | 68 | 214 | 272 | 308 | 181 | 78 | 45 | 18 | 9  | 3  | 2  | 1  | 1244 |

Age 53-57

|     | 36 | 37 | 38 | 39 | 40 | 41  | 42  | 43  | 44 | 45 | 46 | 47 | 48 | 49 | 50 | 52 | 54 | tot |
|-----|----|----|----|----|----|-----|-----|-----|----|----|----|----|----|----|----|----|----|-----|
| F   | 0  | 3  | 5  | 12 | 35 | 113 | 162 | 109 | 34 | 16 | 2  | 3  | 1  | 0  | 0  | 0  | 1  | 496 |
| M   | 1  | 0  | 4  | 6  | 43 | 127 | 171 | 83  | 30 | 11 | 3  | 2  | 3  | 1  | 1  | 1  | 0  | 487 |
| tot | 1  | 3  | 9  | 18 | 78 | 240 | 333 | 192 | 64 | 27 | 5  | 5  | 4  | 1  | 1  | 1  | 1  | 983 |

Supplemental Table 3. Survival curve estimates by CAG length for women with HD onset at age 25

| <b>CAG</b>   | <b>39*</b>  |              |              | <b>40*</b>  |              |              | <b>41</b>   |              |              | <b>42</b>   |              |              | <b>43</b>   |              |              | <b>44</b>   |              |              |
|--------------|-------------|--------------|--------------|-------------|--------------|--------------|-------------|--------------|--------------|-------------|--------------|--------------|-------------|--------------|--------------|-------------|--------------|--------------|
| <b>years</b> | <i>surv</i> | <i>lower</i> | <i>upper</i> |
| <b>5</b>     | 0.991       | 0.986        | 0.995        | 0.989       | 0.985        | 0.994        | 0.988       | 0.983        | 0.993        | 0.987       | 0.981        | 0.992        | 0.985       | 0.979        | 0.991        | 0.983       | 0.976        | 0.989        |
| <b>10</b>    | 0.960       | 0.944        | 0.976        | 0.955       | 0.938        | 0.971        | 0.949       | 0.932        | 0.967        | 0.943       | 0.924        | 0.961        | 0.935       | 0.916        | 0.955        | 0.927       | 0.907        | 0.948        |
| <b>15</b>    | 0.889       | 0.850        | 0.929        | 0.875       | 0.835        | 0.918        | 0.860       | 0.818        | 0.905        | 0.844       | 0.800        | 0.890        | 0.825       | 0.780        | 0.873        | 0.805       | 0.758        | 0.854        |
| <b>20</b>    | 0.756       | 0.683        | 0.837        | 0.729       | 0.654        | 0.812        | 0.699       | 0.623        | 0.785        | 0.667       | 0.591        | 0.754        | 0.633       | 0.557        | 0.720        | 0.596       | 0.520        | 0.684        |
| <b>25</b>    | 0.613       | 0.514        | 0.732        | 0.575       | 0.477        | 0.695        | 0.535       | 0.438        | 0.654        | 0.493       | 0.399        | 0.610        | 0.450       | 0.359        | 0.564        | 0.405       | 0.319        | 0.515        |
| <b>CAG</b>   | <b>45</b>   |              |              | <b>46</b>   |              |              | <b>47</b>   |              |              | <b>48</b>   |              |              | <b>49</b>   |              |              | <b>50</b>   |              |              |
| <b>years</b> | <i>surv</i> | <i>lower</i> | <i>upper</i> |
| <b>5</b>     | 0.981       | 0.974        | 0.988        | 0.978       | 0.970        | 0.986        | 0.975       | 0.967        | 0.984        | 0.972       | 0.963        | 0.981        | 0.968       | 0.958        | 0.979        | 0.964       | 0.953        | 0.976        |
| <b>10</b>    | 0.918       | 0.896        | 0.940        | 0.908       | 0.885        | 0.931        | 0.897       | 0.872        | 0.921        | 0.884       | 0.858        | 0.910        | 0.870       | 0.842        | 0.898        | 0.854       | 0.824        | 0.885        |
| <b>15</b>    | 0.782       | 0.734        | 0.833        | 0.757       | 0.708        | 0.810        | 0.730       | 0.680        | 0.785        | 0.701       | 0.649        | 0.757        | 0.669       | 0.616        | 0.728        | 0.635       | 0.579        | 0.697        |
| <b>20</b>    | 0.558       | 0.483        | 0.644        | 0.517       | 0.443        | 0.602        | 0.474       | 0.402        | 0.558        | 0.430       | 0.360        | 0.513        | 0.385       | 0.318        | 0.467        | 0.340       | 0.275        | 0.421        |
| <b>25</b>    | 0.360       | 0.279        | 0.465        | 0.315       | 0.240        | 0.414        | 0.271       | 0.202        | 0.364        | 0.229       | 0.167        | 0.315        | 0.189       | 0.133        | 0.268        | 0.152       | 0.103        | 0.225        |
| <b>CAG</b>   | <b>51</b>   |              |              | <b>52</b>   |              |              | <b>53</b>   |              |              | <b>54</b>   |              |              | <b>55</b>   |              |              | <b>56</b>   |              |              |
| <b>years</b> | <i>surv</i> | <i>lower</i> | <i>upper</i> | <i>surv</i> | <i>lower</i> | <i>upper</i> | <i>surv</i> | <i>lower</i> | <i>upper</i> | <i>surv</i> | <i>upper</i> | <i>upper</i> | <i>surv</i> | <i>upper</i> | <i>upper</i> | <i>surv</i> | <i>upper</i> | <i>upper</i> |
| <b>5</b>     | 0.947       | 0.973        | 0.955        | 0.941       | 0.969        | 0.949        | 0.933       | 0.965        | 0.943        | 0.925       | 0.961        | 0.935        | 0.915       | 0.956        | 0.927        | 0.904       | 0.951        | 0.947        |
| <b>10</b>    | 0.804       | 0.870        | 0.817        | 0.782       | 0.855        | 0.796        | 0.756       | 0.838        | 0.773        | 0.728       | 0.820        | 0.747        | 0.697       | 0.801        | 0.719        | 0.662       | 0.781        | 0.804        |
| <b>15</b>    | 0.540       | 0.664        | 0.560        | 0.498       | 0.630        | 0.519        | 0.453       | 0.595        | 0.477        | 0.406       | 0.559        | 0.433        | 0.358       | 0.523        | 0.388        | 0.309       | 0.487        | 0.540        |
| <b>20</b>    | 0.232       | 0.376        | 0.252        | 0.191       | 0.332        | 0.210        | 0.152       | 0.290        | 0.172        | 0.117       | 0.251        | 0.136        | 0.087       | 0.215        | 0.105        | 0.061       | 0.182        | 0.232        |
| <b>25</b>    | 0.076       | 0.185        | 0.090        | 0.054       | 0.150        | 0.066        | 0.036       | 0.119        | 0.046        | 0.023       | 0.093        | 0.031        | 0.013       | 0.071        | 0.020        | 0.007       | 0.054        | 0.076        |
| <b>CAG</b>   | <b>57</b>   |              |              | <b>58</b>   |              |              | <b>59</b>   |              |              |             |              |              |             |              |              |             |              |              |
| <b>years</b> | <i>surv</i> | <i>lower</i> | <i>upper</i> | <i>surv</i> | <i>lower</i> | <i>upper</i> | <i>surv</i> | <i>lower</i> | <i>upper</i> |             |              |              |             |              |              |             |              |              |
| <b>5</b>     | 0.918       | 0.891        | 0.946        | 0.908       | 0.877        | 0.940        | 0.897       | 0.861        | 0.934        |             |              |              |             |              |              |             |              |              |
| <b>10</b>    | 0.689       | 0.625        | 0.760        | 0.656       | 0.584        | 0.738        | 0.621       | 0.540        | 0.715        |             |              |              |             |              |              |             |              |              |
| <b>15</b>    | 0.343       | 0.261        | 0.450        | 0.298       | 0.215        | 0.414        | 0.254       | 0.171        | 0.378        |             |              |              |             |              |              |             |              |              |
| <b>20</b>    | 0.078       | 0.041        | 0.151        | 0.056       | 0.025        | 0.125        | 0.039       | 0.015        | 0.101        |             |              |              |             |              |              |             |              |              |
| <b>25</b>    | 0.012       | 0.003        | 0.039        | 0.007       | 0.002        | 0.028        | 0.003       | 0.001        | 0.020        |             |              |              |             |              |              |             |              |              |

Data is plotted in Figure 1 of the main article. *surv* = survival rate, *lower* = lower 95% confidence bound, *upper* = upper 95% confidence bound.

\* CAG length represents less than 1% of those onset HD onset in this age range. Estimate for this CAG length is an extrapolation from the survival model.

Supplemental Table 4. Survival curve estimates by CAG length for women with HD onset at age 35

| <b>CAG</b>   | <b>39*</b>  |              |              | <b>40*</b>  |              |              | <b>41</b>   |              |              | <b>42</b>   |              |              | <b>43</b>   |              |              | <b>44</b>   |              |              |
|--------------|-------------|--------------|--------------|-------------|--------------|--------------|-------------|--------------|--------------|-------------|--------------|--------------|-------------|--------------|--------------|-------------|--------------|--------------|
| <b>years</b> | <i>surv</i> | <i>lower</i> | <i>upper</i> |
| <b>5</b>     | 0.983       | 0.977        | 0.989        | 0.981       | 0.975        | 0.987        | 0.979       | 0.972        | 0.986        | 0.976       | 0.968        | 0.983        | 0.973       | 0.964        | 0.981        | 0.969       | 0.960        | 0.978        |
| <b>10</b>    | 0.929       | 0.910        | 0.948        | 0.920       | 0.901        | 0.940        | 0.910       | 0.890        | 0.930        | 0.899       | 0.878        | 0.920        | 0.886       | 0.865        | 0.909        | 0.873       | 0.850        | 0.896        |
| <b>15</b>    | 0.809       | 0.767        | 0.853        | 0.787       | 0.745        | 0.831        | 0.763       | 0.720        | 0.807        | 0.736       | 0.694        | 0.781        | 0.707       | 0.665        | 0.753        | 0.676       | 0.633        | 0.722        |
| <b>20</b>    | 0.604       | 0.535        | 0.682        | 0.566       | 0.498        | 0.642        | 0.525       | 0.460        | 0.599        | 0.483       | 0.421        | 0.554        | 0.439       | 0.380        | 0.507        | 0.394       | 0.338        | 0.459        |
| <b>25</b>    | 0.414       | 0.334        | 0.514        | 0.369       | 0.295        | 0.463        | 0.324       | 0.256        | 0.411        | 0.280       | 0.218        | 0.359        | 0.237       | 0.182        | 0.309        | 0.197       | 0.148        | 0.262        |
| <b>CAG</b>   | <b>45</b>   |              |              | <b>46</b>   |              |              | <b>47</b>   |              |              | <b>48</b>   |              |              | <b>49</b>   |              |              | <b>50</b>   |              |              |
| <b>years</b> | <i>surv</i> | <i>lower</i> | <i>upper</i> |
| <b>5</b>     | 0.965       | 0.955        | 0.975        | 0.961       | 0.950        | 0.972        | 0.956       | 0.943        | 0.968        | 0.950       | 0.936        | 0.964        | 0.944       | 0.928        | 0.960        | 0.937       | 0.919        | 0.955        |
| <b>10</b>    | 0.857       | 0.833        | 0.882        | 0.840       | 0.814        | 0.867        | 0.821       | 0.793        | 0.851        | 0.801       | 0.769        | 0.833        | 0.778       | 0.742        | 0.815        | 0.753       | 0.712        | 0.796        |
| <b>15</b>    | 0.642       | 0.598        | 0.689        | 0.606       | 0.561        | 0.656        | 0.568       | 0.520        | 0.621        | 0.527       | 0.476        | 0.585        | 0.485       | 0.429        | 0.549        | 0.442       | 0.380        | 0.512        |
| <b>20</b>    | 0.349       | 0.296        | 0.412        | 0.304       | 0.253        | 0.366        | 0.261       | 0.211        | 0.322        | 0.219       | 0.170        | 0.281        | 0.179       | 0.133        | 0.242        | 0.143       | 0.099        | 0.207        |
| <b>25</b>    | 0.159       | 0.116        | 0.218        | 0.125       | 0.088        | 0.178        | 0.095       | 0.063        | 0.144        | 0.070       | 0.043        | 0.114        | 0.050       | 0.028        | 0.088        | 0.034       | 0.017        | 0.067        |
| <b>CAG</b>   | <b>51</b>   |              |              | <b>52</b>   |              |              | <b>53*</b>  |              |              | <b>54*</b>  |              |              | <b>55*</b>  |              |              | <b>56*</b>  |              |              |
| <b>years</b> | <i>surv</i> | <i>lower</i> | <i>upper</i> | <i>surv</i> | <i>lower</i> | <i>upper</i> | <i>surv</i> | <i>lower</i> | <i>upper</i> | <i>surv</i> | <i>upper</i> | <i>upper</i> | <i>surv</i> | <i>upper</i> | <i>upper</i> | <i>surv</i> | <i>upper</i> | <i>upper</i> |
| <b>5</b>     | 0.929       | 0.908        | 0.950        | 0.920       | 0.896        | 0.945        | 0.910       | 0.882        | 0.939        | 0.899       | 0.867        | 0.933        | 0.887       | 0.849        | 0.926        | 0.873       | 0.829        | 0.918        |
| <b>10</b>    | 0.725       | 0.678        | 0.775        | 0.695       | 0.641        | 0.754        | 0.663       | 0.601        | 0.732        | 0.628       | 0.557        | 0.709        | 0.592       | 0.511        | 0.685        | 0.552       | 0.462        | 0.660        |
| <b>15</b>    | 0.397       | 0.331        | 0.476        | 0.352       | 0.281        | 0.440        | 0.307       | 0.233        | 0.404        | 0.263       | 0.188        | 0.369        | 0.221       | 0.146        | 0.335        | 0.182       | 0.109        | 0.301        |
| <b>20</b>    | 0.111       | 0.071        | 0.174        | 0.083       | 0.048        | 0.145        | 0.060       | 0.031        | 0.119        | 0.042       | 0.018        | 0.096        | 0.028       | 0.010        | 0.077        | 0.017       | 0.005        | 0.060        |
| <b>25</b>    | 0.022       | 0.009        | 0.050        | 0.013       | 0.005        | 0.037        | 0.007       | 0.002        | 0.026        | 0.004       | 0.001        | 0.018        | 0.002       | 0.000        | 0.012        | 0.001       | 0.000        | 0.008        |
| <b>CAG</b>   | <b>57*</b>  |              |              | <b>58*</b>  |              |              | <b>59*</b>  |              |              |             |              |              |             |              |              |             |              |              |
| <b>years</b> | <i>surv</i> | <i>lower</i> | <i>upper</i> | <i>surv</i> | <i>lower</i> | <i>upper</i> | <i>surv</i> | <i>lower</i> | <i>upper</i> |             |              |              |             |              |              |             |              |              |
| <b>5</b>     | 0.857       | 0.807        | 0.911        | 0.840       | 0.782        | 0.903        | 0.821       | 0.755        | 0.894        |             |              |              |             |              |              |             |              |              |
| <b>10</b>    | 0.511       | 0.412        | 0.634        | 0.468       | 0.361        | 0.608        | 0.424       | 0.310        | 0.581        |             |              |              |             |              |              |             |              |              |
| <b>15</b>    | 0.145       | 0.078        | 0.269        | 0.113       | 0.054        | 0.238        | 0.085       | 0.034        | 0.210        |             |              |              |             |              |              |             |              |              |
| <b>20</b>    | 0.010       | 0.002        | 0.046        | 0.006       | 0.001        | 0.035        | 0.003       | 0.000        | 0.026        |             |              |              |             |              |              |             |              |              |
| <b>25</b>    | 0.000       | 0.000        | 0.005        | 0.000       | 0.000        | 0.003        | 0.000       | 0.000        | 0.002        |             |              |              |             |              |              |             |              |              |

Data is plotted in Figure 1 of the main article. *surv* = survival rate, *lower* = lower 95% confidence bound, *upper* = upper 95% confidence bound.

\* CAG length represents less than 1% of those onset HD onset in this age range. Estimate for this CAG length is an extrapolation from the survival model.

Supplemental Table 5. Survival curve estimates by CAG length for women with HD onset at age 45

| <b>CAG</b>   | <b>39*</b>  |              |              | <b>40</b>   |              |              | <b>41</b>   |              |              | <b>42</b>   |              |              | <b>43</b>   |              |              | <b>44</b>   |              |              |
|--------------|-------------|--------------|--------------|-------------|--------------|--------------|-------------|--------------|--------------|-------------|--------------|--------------|-------------|--------------|--------------|-------------|--------------|--------------|
| <b>years</b> | <i>surv</i> | <i>lower</i> | <i>upper</i> |
| <b>5</b>     | 0.981       | 0.974        | 0.987        | 0.978       | 0.971        | 0.985        | 0.975       | 0.968        | 0.983        | 0.972       | 0.964        | 0.980        | 0.969       | 0.960        | 0.978        | 0.965       | 0.955        | 0.975        |
| <b>10</b>    | 0.918       | 0.901        | 0.936        | 0.908       | 0.890        | 0.927        | 0.897       | 0.878        | 0.916        | 0.884       | 0.864        | 0.904        | 0.870       | 0.849        | 0.891        | 0.854       | 0.832        | 0.877        |
| <b>15</b>    | 0.783       | 0.745        | 0.822        | 0.758       | 0.720        | 0.798        | 0.731       | 0.694        | 0.771        | 0.702       | 0.664        | 0.742        | 0.670       | 0.632        | 0.711        | 0.636       | 0.596        | 0.679        |
| <b>20</b>    | 0.559       | 0.499        | 0.626        | 0.518       | 0.460        | 0.582        | 0.475       | 0.420        | 0.537        | 0.431       | 0.379        | 0.490        | 0.386       | 0.336        | 0.444        | 0.341       | 0.292        | 0.398        |
| <b>25</b>    | 0.362       | 0.294        | 0.444        | 0.317       | 0.255        | 0.393        | 0.272       | 0.217        | 0.343        | 0.230       | 0.180        | 0.294        | 0.190       | 0.145        | 0.249        | 0.153       | 0.113        | 0.207        |
| <b>CAG</b>   | <b>45</b>   |              |              | <b>46</b>   |              |              | <b>47</b>   |              |              | <b>48</b>   |              |              | <b>49*</b>  |              |              | <b>50*</b>  |              |              |
| <b>years</b> | <i>surv</i> | <i>lower</i> | <i>upper</i> |
| <b>5</b>     | 0.960       | 0.949        | 0.971        | 0.955       | 0.942        | 0.968        | 0.949       | 0.935        | 0.964        | 0.943       | 0.926        | 0.959        | 0.936       | 0.917        | 0.955        | 0.927       | 0.906        | 0.950        |
| <b>10</b>    | 0.837       | 0.813        | 0.862        | 0.818       | 0.790        | 0.846        | 0.797       | 0.765        | 0.829        | 0.773       | 0.737        | 0.811        | 0.748       | 0.706        | 0.793        | 0.720       | 0.671        | 0.773        |
| <b>15</b>    | 0.600       | 0.557        | 0.645        | 0.561       | 0.515        | 0.611        | 0.520       | 0.469        | 0.577        | 0.478       | 0.421        | 0.542        | 0.434       | 0.371        | 0.507        | 0.389       | 0.321        | 0.472        |
| <b>20</b>    | 0.297       | 0.248        | 0.354        | 0.253       | 0.205        | 0.312        | 0.211       | 0.164        | 0.273        | 0.173       | 0.126        | 0.236        | 0.137       | 0.093        | 0.202        | 0.106       | 0.066        | 0.171        |
| <b>25</b>    | 0.120       | 0.084        | 0.170        | 0.091       | 0.060        | 0.138        | 0.066       | 0.040        | 0.109        | 0.047       | 0.025        | 0.086        | 0.031       | 0.015        | 0.066        | 0.020       | 0.008        | 0.049        |
| <b>CAG</b>   | <b>51*</b>  |              |              | <b>52*</b>  |              |              | <b>53*</b>  |              |              | <b>54*</b>  |              |              | <b>55*</b>  |              |              | <b>56*</b>  |              |              |
| <b>years</b> | <i>surv</i> | <i>lower</i> | <i>upper</i> | <i>surv</i> | <i>lower</i> | <i>upper</i> | <i>surv</i> | <i>lower</i> | <i>upper</i> | <i>surv</i> | <i>upper</i> | <i>upper</i> | <i>surv</i> | <i>upper</i> | <i>upper</i> | <i>surv</i> | <i>upper</i> | <i>upper</i> |
| <b>5</b>     | 0.918       | 0.893        | 0.944        | 0.908       | 0.879        | 0.939        | 0.897       | 0.863        | 0.932        | 0.884       | 0.845        | 0.926        | 0.870       | 0.824        | 0.919        | 0.854       | 0.801        | 0.911        |
| <b>10</b>    | 0.690       | 0.633        | 0.752        | 0.657       | 0.591        | 0.730        | 0.622       | 0.547        | 0.708        | 0.585       | 0.500        | 0.684        | 0.545       | 0.450        | 0.660        | 0.504       | 0.400        | 0.635        |
| <b>15</b>    | 0.344       | 0.271        | 0.437        | 0.299       | 0.223        | 0.402        | 0.256       | 0.178        | 0.368        | 0.214       | 0.137        | 0.334        | 0.175       | 0.101        | 0.302        | 0.139       | 0.072        | 0.270        |
| <b>20</b>    | 0.079       | 0.044        | 0.143        | 0.057       | 0.027        | 0.118        | 0.039       | 0.016        | 0.096        | 0.026       | 0.009        | 0.077        | 0.016       | 0.004        | 0.060        | 0.009       | 0.002        | 0.047        |
| <b>25</b>    | 0.012       | 0.004        | 0.036        | 0.007       | 0.002        | 0.026        | 0.003       | 0.001        | 0.018        | 0.002       | 0.000        | 0.013        | 0.001       | 0.000        | 0.008        | 0.000       | 0.000        | 0.005        |
| <b>CAG</b>   | <b>57*</b>  |              |              | <b>58*</b>  |              |              | <b>59*</b>  |              |              |             |              |              |             |              |              |             |              |              |
| <b>years</b> | <i>surv</i> | <i>lower</i> | <i>upper</i> | <i>surv</i> | <i>lower</i> | <i>upper</i> | <i>surv</i> | <i>lower</i> | <i>upper</i> |             |              |              |             |              |              |             |              |              |
| <b>5</b>     | 0.837       | 0.776        | 0.903        | 0.818       | 0.748        | 0.895        | 0.797       | 0.716        | 0.886        |             |              |              |             |              |              |             |              |              |
| <b>10</b>    | 0.461       | 0.348        | 0.609        | 0.416       | 0.297        | 0.583        | 0.371       | 0.248        | 0.556        |             |              |              |             |              |              |             |              |              |
| <b>15</b>    | 0.108       | 0.048        | 0.240        | 0.081       | 0.031        | 0.212        | 0.058       | 0.018        | 0.186        |             |              |              |             |              |              |             |              |              |
| <b>20</b>    | 0.005       | 0.001        | 0.036        | 0.003       | 0.000        | 0.027        | 0.001       | 0.000        | 0.020        |             |              |              |             |              |              |             |              |              |
| <b>25</b>    | 0.000       | 0.000        | 0.003        | 0.000       | 0.000        | 0.002        | 0.000       | 0.000        | 0.001        |             |              |              |             |              |              |             |              |              |

Data is plotted in Figure 1 of the main article. *surv* = survival rate, *lower* = lower 95% confidence bound, *upper* = upper 95% confidence bound.

\* CAG length represents less than 1% of those onset HD onset in this age range. Estimate for this CAG length is an extrapolation from the survival model.

Supplemental Table 6. Survival curve estimates by CAG length for women with HD onset at age 55

| <b>CAG</b>   | <b>39</b>   |              |              | <b>40</b>   |              |              | <b>41</b>   |              |              | <b>42</b>   |              |              | <b>43</b>   |              |              | <b>44</b>   |              |              |
|--------------|-------------|--------------|--------------|-------------|--------------|--------------|-------------|--------------|--------------|-------------|--------------|--------------|-------------|--------------|--------------|-------------|--------------|--------------|
| <b>years</b> | <i>surv</i> | <i>lower</i> | <i>upper</i> |
| <b>5</b>     | 0.976       | 0.968        | 0.984        | 0.973       | 0.964        | 0.981        | 0.969       | 0.960        | 0.979        | 0.965       | 0.955        | 0.976        | 0.961       | 0.949        | 0.972        | 0.956       | 0.943        | 0.969        |
| <b>10</b>    | 0.898       | 0.877        | 0.921        | 0.886       | 0.863        | 0.909        | 0.872       | 0.848        | 0.896        | 0.857       | 0.832        | 0.882        | 0.839       | 0.813        | 0.867        | 0.820       | 0.791        | 0.850        |
| <b>15</b>    | 0.735       | 0.690        | 0.783        | 0.706       | 0.661        | 0.754        | 0.674       | 0.629        | 0.723        | 0.641       | 0.595        | 0.690        | 0.605       | 0.557        | 0.656        | 0.566       | 0.517        | 0.620        |
| <b>20</b>    | 0.481       | 0.415        | 0.557        | 0.437       | 0.374        | 0.510        | 0.392       | 0.333        | 0.462        | 0.347       | 0.290        | 0.415        | 0.302       | 0.248        | 0.368        | 0.259       | 0.207        | 0.323        |
| <b>25</b>    | 0.278       | 0.212        | 0.365        | 0.235       | 0.176        | 0.314        | 0.195       | 0.143        | 0.266        | 0.157       | 0.112        | 0.222        | 0.124       | 0.084        | 0.181        | 0.094       | 0.061        | 0.146        |
| <b>CAG</b>   | <b>45</b>   |              |              | <b>46*</b>  |              |              | <b>47*</b>  |              |              | <b>48*</b>  |              |              | <b>49*</b>  |              |              | <b>50*</b>  |              |              |
| <b>years</b> | <i>surv</i> | <i>lower</i> | <i>upper</i> |
| <b>5</b>     | 0.950       | 0.936        | 0.965        | 0.944       | 0.927        | 0.960        | 0.937       | 0.918        | 0.955        | 0.929       | 0.907        | 0.950        | 0.920       | 0.895        | 0.945        | 0.910       | 0.881        | 0.939        |
| <b>10</b>    | 0.800       | 0.768        | 0.833        | 0.777       | 0.741        | 0.814        | 0.751       | 0.711        | 0.794        | 0.724       | 0.677        | 0.774        | 0.694       | 0.640        | 0.752        | 0.662       | 0.600        | 0.729        |
| <b>15</b>    | 0.526       | 0.473        | 0.584        | 0.483       | 0.427        | 0.547        | 0.440       | 0.379        | 0.510        | 0.395       | 0.330        | 0.473        | 0.350       | 0.281        | 0.436        | 0.305       | 0.233        | 0.400        |
| <b>20</b>    | 0.217       | 0.167        | 0.281        | 0.178       | 0.131        | 0.241        | 0.142       | 0.098        | 0.205        | 0.110       | 0.070        | 0.172        | 0.082       | 0.047        | 0.143        | 0.059       | 0.030        | 0.117        |
| <b>25</b>    | 0.069       | 0.042        | 0.115        | 0.049       | 0.027        | 0.089        | 0.033       | 0.016        | 0.068        | 0.021       | 0.009        | 0.050        | 0.013       | 0.004        | 0.037        | 0.007       | 0.002        | 0.026        |
| <b>CAG</b>   | <b>51*</b>  |              |              | <b>52*</b>  |              |              | <b>53*</b>  |              |              | <b>54*</b>  |              |              | <b>55*</b>  |              |              | <b>56*</b>  |              |              |
| <b>years</b> | <i>surv</i> | <i>lower</i> | <i>upper</i> | <i>surv</i> | <i>lower</i> | <i>upper</i> | <i>surv</i> | <i>lower</i> | <i>upper</i> | <i>surv</i> | <i>upper</i> | <i>upper</i> | <i>surv</i> | <i>upper</i> | <i>upper</i> | <i>surv</i> | <i>upper</i> | <i>upper</i> |
| <b>5</b>     | 0.898       | 0.866        | 0.932        | 0.886       | 0.848        | 0.925        | 0.872       | 0.829        | 0.918        | 0.857       | 0.806        | 0.910        | 0.839       | 0.782        | 0.901        | 0.820       | 0.754        | 0.893        |
| <b>10</b>    | 0.627       | 0.557        | 0.706        | 0.590       | 0.511        | 0.681        | 0.551       | 0.462        | 0.656        | 0.509       | 0.412        | 0.630        | 0.466       | 0.361        | 0.603        | 0.422       | 0.310        | 0.575        |
| <b>15</b>    | 0.261       | 0.187        | 0.364        | 0.219       | 0.146        | 0.329        | 0.180       | 0.109        | 0.295        | 0.144       | 0.079        | 0.263        | 0.112       | 0.054        | 0.232        | 0.084       | 0.035        | 0.203        |
| <b>20</b>    | 0.041       | 0.018        | 0.094        | 0.027       | 0.010        | 0.074        | 0.017       | 0.005        | 0.058        | 0.010       | 0.002        | 0.044        | 0.005       | 0.001        | 0.033        | 0.003       | 0.000        | 0.024        |
| <b>25</b>    | 0.004       | 0.001        | 0.018        | 0.002       | 0.000        | 0.012        | 0.001       | 0.000        | 0.008        | 0.000       | 0.000        | 0.005        | 0.000       | 0.000        | 0.003        | 0.000       | 0.000        | 0.002        |
| <b>CAG</b>   | <b>57*</b>  |              |              | <b>58*</b>  |              |              | <b>59*</b>  |              |              |             |              |              |             |              |              |             |              |              |
| <b>years</b> | <i>surv</i> | <i>lower</i> | <i>upper</i> | <i>surv</i> | <i>lower</i> | <i>upper</i> | <i>surv</i> | <i>lower</i> | <i>upper</i> |             |              |              |             |              |              |             |              |              |
| <b>5</b>     | 0.800       | 0.724        | 0.883        | 0.777       | 0.690        | 0.873        | 0.751       | 0.654        | 0.863        |             |              |              |             |              |              |             |              |              |
| <b>10</b>    | 0.377       | 0.260        | 0.547        | 0.332       | 0.213        | 0.519        | 0.288       | 0.169        | 0.491        |             |              |              |             |              |              |             |              |              |
| <b>15</b>    | 0.061       | 0.021        | 0.177        | 0.042       | 0.012        | 0.152        | 0.028       | 0.006        | 0.130        |             |              |              |             |              |              |             |              |              |
| <b>20</b>    | 0.001       | 0.000        | 0.018        | 0.001       | 0.000        | 0.012        | 0.000       | 0.000        | 0.009        |             |              |              |             |              |              |             |              |              |
| <b>25</b>    | 0.000       | 0.000        | 0.001        | 0.000       | 0.000        | 0.001        | 0.000       | 0.000        | 0.000        |             |              |              |             |              |              |             |              |              |

Data is plotted in Figure 1 of the main article. *surv* = survival rate, *lower* = lower 95% confidence bound, *upper* = upper 95% confidence bound.

\* CAG length represents less than 1% of those onset HD onset in this age range. Estimate for this CAG length is an extrapolation from the survival model.



Supplemental Table 7. Survival curve estimates by CAG length for men with HD onset at age 25

| <b>CAG</b>   | <b>39*</b>  |              |              | <b>40*</b>  |              |              | <b>41</b>   |              |              | <b>42</b>   |              |              | <b>43</b>   |              |              | <b>44</b>   |              |              |
|--------------|-------------|--------------|--------------|-------------|--------------|--------------|-------------|--------------|--------------|-------------|--------------|--------------|-------------|--------------|--------------|-------------|--------------|--------------|
| <b>years</b> | <i>surv</i> | <i>lower</i> | <i>upper</i> |
| <b>5</b>     | 0.982       | 0.974        | 0.990        | 0.981       | 0.973        | 0.989        | 0.979       | 0.971        | 0.988        | 0.977       | 0.969        | 0.986        | 0.975       | 0.966        | 0.985        | 0.973       | 0.964        | 0.983        |
| <b>10</b>    | 0.925       | 0.898        | 0.952        | 0.919       | 0.891        | 0.947        | 0.912       | 0.884        | 0.941        | 0.905       | 0.877        | 0.934        | 0.897       | 0.869        | 0.927        | 0.889       | 0.860        | 0.920        |
| <b>15</b>    | 0.798       | 0.737        | 0.865        | 0.783       | 0.721        | 0.850        | 0.767       | 0.706        | 0.835        | 0.751       | 0.689        | 0.818        | 0.733       | 0.671        | 0.800        | 0.714       | 0.653        | 0.780        |
| <b>20</b>    | 0.585       | 0.487        | 0.704        | 0.559       | 0.463        | 0.676        | 0.533       | 0.440        | 0.646        | 0.506       | 0.416        | 0.615        | 0.477       | 0.391        | 0.583        | 0.449       | 0.366        | 0.550        |
| <b>25</b>    | 0.392       | 0.285        | 0.540        | 0.363       | 0.261        | 0.503        | 0.333       | 0.238        | 0.465        | 0.304       | 0.216        | 0.427        | 0.275       | 0.194        | 0.390        | 0.247       | 0.173        | 0.352        |
| <b>CAG</b>   | <b>45</b>   |              |              | <b>46</b>   |              |              | <b>47</b>   |              |              | <b>48</b>   |              |              | <b>49</b>   |              |              | <b>50</b>   |              |              |
| <b>years</b> | <i>surv</i> | <i>lower</i> | <i>upper</i> |
| <b>5</b>     | 0.971       | 0.961        | 0.981        | 0.969       | 0.958        | 0.980        | 0.966       | 0.955        | 0.978        | 0.964       | 0.952        | 0.975        | 0.961       | 0.948        | 0.973        | 0.957       | 0.944        | 0.971        |
| <b>10</b>    | 0.881       | 0.851        | 0.911        | 0.871       | 0.841        | 0.903        | 0.861       | 0.831        | 0.893        | 0.851       | 0.819        | 0.883        | 0.839       | 0.807        | 0.873        | 0.827       | 0.794        | 0.862        |
| <b>15</b>    | 0.694       | 0.634        | 0.760        | 0.673       | 0.614        | 0.738        | 0.651       | 0.592        | 0.716        | 0.628       | 0.570        | 0.692        | 0.604       | 0.546        | 0.668        | 0.579       | 0.521        | 0.644        |
| <b>20</b>    | 0.420       | 0.341        | 0.516        | 0.390       | 0.316        | 0.482        | 0.361       | 0.290        | 0.448        | 0.331       | 0.264        | 0.415        | 0.302       | 0.239        | 0.382        | 0.273       | 0.213        | 0.350        |
| <b>25</b>    | 0.219       | 0.152        | 0.316        | 0.193       | 0.133        | 0.281        | 0.168       | 0.114        | 0.248        | 0.145       | 0.097        | 0.217        | 0.123       | 0.081        | 0.189        | 0.104       | 0.066        | 0.163        |
| <b>CAG</b>   | <b>51</b>   |              |              | <b>52</b>   |              |              | <b>53</b>   |              |              | <b>54</b>   |              |              | <b>55</b>   |              |              | <b>56</b>   |              |              |
| <b>years</b> | <i>surv</i> | <i>lower</i> | <i>upper</i> | <i>surv</i> | <i>lower</i> | <i>upper</i> | <i>surv</i> | <i>lower</i> | <i>upper</i> | <i>surv</i> | <i>upper</i> | <i>upper</i> | <i>surv</i> | <i>upper</i> | <i>upper</i> | <i>surv</i> | <i>upper</i> | <i>upper</i> |
| <b>5</b>     | 0.954       | 0.940        | 0.968        | 0.950       | 0.935        | 0.965        | 0.946       | 0.930        | 0.963        | 0.942       | 0.924        | 0.960        | 0.937       | 0.918        | 0.957        | 0.932       | 0.911        | 0.954        |
| <b>10</b>    | 0.814       | 0.779        | 0.850        | 0.800       | 0.763        | 0.838        | 0.785       | 0.746        | 0.826        | 0.769       | 0.727        | 0.814        | 0.753       | 0.707        | 0.801        | 0.735       | 0.685        | 0.789        |
| <b>15</b>    | 0.553       | 0.494        | 0.619        | 0.527       | 0.466        | 0.595        | 0.499       | 0.437        | 0.570        | 0.471       | 0.406        | 0.546        | 0.442       | 0.374        | 0.522        | 0.413       | 0.342        | 0.499        |
| <b>20</b>    | 0.245       | 0.188        | 0.320        | 0.218       | 0.163        | 0.291        | 0.192       | 0.139        | 0.264        | 0.167       | 0.116        | 0.239        | 0.144       | 0.096        | 0.216        | 0.122       | 0.077        | 0.194        |
| <b>25</b>    | 0.086       | 0.052        | 0.140        | 0.070       | 0.041        | 0.119        | 0.056       | 0.031        | 0.101        | 0.044       | 0.022        | 0.086        | 0.034       | 0.016        | 0.072        | 0.025       | 0.011        | 0.060        |
| <b>CAG</b>   | <b>57</b>   |              |              | <b>58</b>   |              |              | <b>59</b>   |              |              |             |              |              |             |              |              |             |              |              |
| <b>years</b> | <i>surv</i> | <i>lower</i> | <i>upper</i> | <i>surv</i> | <i>lower</i> | <i>upper</i> | <i>surv</i> | <i>lower</i> | <i>upper</i> |             |              |              |             |              |              |             |              |              |
| <b>5</b>     | 0.926       | 0.903        | 0.950        | 0.920       | 0.895        | 0.947        | 0.914       | 0.885        | 0.944        |             |              |              |             |              |              |             |              |              |
| <b>10</b>    | 0.716       | 0.661        | 0.776        | 0.697       | 0.636        | 0.763        | 0.676       | 0.609        | 0.750        |             |              |              |             |              |              |             |              |              |
| <b>15</b>    | 0.383       | 0.309        | 0.476        | 0.354       | 0.276        | 0.454        | 0.324       | 0.243        | 0.432        |             |              |              |             |              |              |             |              |              |
| <b>20</b>    | 0.102       | 0.060        | 0.175        | 0.085       | 0.046        | 0.156        | 0.069       | 0.034        | 0.140        |             |              |              |             |              |              |             |              |              |
| <b>25</b>    | 0.019       | 0.007        | 0.050        | 0.013       | 0.004        | 0.042        | 0.009       | 0.003        | 0.034        |             |              |              |             |              |              |             |              |              |

Data is plotted in Figure 2 of the main article. *surv* = survival rate, *lower* = lower 95% confidence bound, *upper* = upper 95% confidence bound.

\* CAG length represents less than 1% of those onset HD onset in this age range. Estimate for this CAG length is an extrapolation from the survival model.

Supplemental Table 8. Survival curve estimates by CAG length for men with HD onset at age 35

| <b>CAG</b>   | <b>39*</b>  |              |              | <b>40*</b>  |              |              | <b>41</b>   |              |              | <b>42</b>   |              |              | <b>43</b>   |              |              | <b>44</b>   |              |              |
|--------------|-------------|--------------|--------------|-------------|--------------|--------------|-------------|--------------|--------------|-------------|--------------|--------------|-------------|--------------|--------------|-------------|--------------|--------------|
| <b>years</b> | <i>surv</i> | <i>lower</i> | <i>upper</i> |
| <b>5</b>     | 0.968       | 0.958        | 0.979        | 0.965       | 0.955        | 0.977        | 0.963       | 0.951        | 0.974        | 0.960       | 0.948        | 0.972        | 0.956       | 0.944        | 0.969        | 0.953       | 0.939        | 0.966        |
| <b>10</b>    | 0.868       | 0.838        | 0.899        | 0.858       | 0.828        | 0.889        | 0.847       | 0.817        | 0.878        | 0.835       | 0.806        | 0.866        | 0.823       | 0.793        | 0.854        | 0.810       | 0.779        | 0.841        |
| <b>15</b>    | 0.666       | 0.608        | 0.731        | 0.644       | 0.587        | 0.706        | 0.621       | 0.566        | 0.681        | 0.596       | 0.543        | 0.654        | 0.571       | 0.520        | 0.627        | 0.545       | 0.495        | 0.600        |
| <b>20</b>    | 0.381       | 0.309        | 0.470        | 0.351       | 0.285        | 0.433        | 0.322       | 0.260        | 0.397        | 0.293       | 0.236        | 0.362        | 0.264       | 0.212        | 0.328        | 0.236       | 0.189        | 0.296        |
| <b>25</b>    | 0.185       | 0.128        | 0.268        | 0.161       | 0.111        | 0.234        | 0.138       | 0.094        | 0.202        | 0.117       | 0.079        | 0.172        | 0.098       | 0.065        | 0.146        | 0.080       | 0.053        | 0.122        |
| <b>CAG</b>   | <b>45</b>   |              |              | <b>46</b>   |              |              | <b>47</b>   |              |              | <b>48</b>   |              |              | <b>49</b>   |              |              | <b>50</b>   |              |              |
| <b>years</b> | <i>surv</i> | <i>lower</i> | <i>upper</i> |
| <b>5</b>     | 0.949       | 0.935        | 0.963        | 0.945       | 0.929        | 0.960        | 0.940       | 0.924        | 0.957        | 0.935       | 0.918        | 0.953        | 0.930       | 0.911        | 0.950        | 0.924       | 0.903        | 0.949        |
| <b>10</b>    | 0.795       | 0.764        | 0.828        | 0.780       | 0.748        | 0.814        | 0.764       | 0.730        | 0.800        | 0.747       | 0.710        | 0.786        | 0.729       | 0.689        | 0.772        | 0.710       | 0.666        | 0.795        |
| <b>15</b>    | 0.518       | 0.469        | 0.572        | 0.490       | 0.441        | 0.545        | 0.462       | 0.411        | 0.518        | 0.433       | 0.380        | 0.492        | 0.403       | 0.348        | 0.467        | 0.374       | 0.315        | 0.518        |
| <b>20</b>    | 0.209       | 0.165        | 0.265        | 0.184       | 0.142        | 0.237        | 0.159       | 0.120        | 0.211        | 0.137       | 0.099        | 0.188        | 0.116       | 0.080        | 0.167        | 0.096       | 0.063        | 0.209        |
| <b>25</b>    | 0.065       | 0.041        | 0.102        | 0.052       | 0.032        | 0.084        | 0.040       | 0.023        | 0.070        | 0.031       | 0.017        | 0.057        | 0.023       | 0.011        | 0.047        | 0.017       | 0.007        | 0.065        |
| <b>CAG</b>   | <b>51</b>   |              |              | <b>52</b>   |              |              | <b>53*</b>  |              |              | <b>54*</b>  |              |              | <b>55*</b>  |              |              | <b>56*</b>  |              |              |
| <b>years</b> | <i>surv</i> | <i>lower</i> | <i>upper</i> | <i>surv</i> | <i>lower</i> | <i>upper</i> | <i>surv</i> | <i>lower</i> | <i>upper</i> | <i>surv</i> | <i>upper</i> | <i>upper</i> | <i>surv</i> | <i>upper</i> | <i>upper</i> | <i>surv</i> | <i>upper</i> | <i>upper</i> |
| <b>5</b>     | 0.946       | 0.918        | 0.895        | 0.942       | 0.912        | 0.886        | 0.939       | 0.905        | 0.876        | 0.935       | 0.897        | 0.865        | 0.930       | 0.889        | 0.854        | 0.926       | 0.881        | 0.841        |
| <b>10</b>    | 0.757       | 0.690        | 0.641        | 0.743       | 0.669        | 0.614        | 0.729       | 0.647        | 0.586        | 0.714       | 0.624        | 0.556        | 0.700       | 0.600        | 0.525        | 0.685       | 0.574        | 0.492        |
| <b>15</b>    | 0.443       | 0.344        | 0.282        | 0.420       | 0.315        | 0.250        | 0.397       | 0.286        | 0.218        | 0.375       | 0.257        | 0.187        | 0.354       | 0.230        | 0.158        | 0.334       | 0.203        | 0.131        |
| <b>20</b>    | 0.148       | 0.079        | 0.048        | 0.131       | 0.064        | 0.036        | 0.115       | 0.051        | 0.026        | 0.101       | 0.040        | 0.018        | 0.089       | 0.030        | 0.012        | 0.077       | 0.023        | 0.008        |
| <b>25</b>    | 0.038       | 0.012        | 0.005        | 0.031       | 0.008        | 0.003        | 0.025       | 0.006        | 0.002        | 0.020       | 0.004        | 0.001        | 0.016       | 0.002        | 0.000        | 0.013       | 0.001        | 0.000        |
| <b>CAG</b>   | <b>57*</b>  |              |              | <b>58*</b>  |              |              | <b>59*</b>  |              |              |             |              |              |             |              |              |             |              |              |
| <b>years</b> | <i>surv</i> | <i>lower</i> | <i>upper</i> | <i>surv</i> | <i>lower</i> | <i>upper</i> | <i>surv</i> | <i>lower</i> | <i>upper</i> |             |              |              |             |              |              |             |              |              |
| <b>5</b>     | 0.871       | 0.827        | 0.918        | 0.861       | 0.812        | 0.913        | 0.850       | 0.796        | 0.909        |             |              |              |             |              |              |             |              |              |
| <b>10</b>    | 0.548       | 0.458        | 0.656        | 0.521       | 0.424        | 0.641        | 0.494       | 0.389        | 0.627        |             |              |              |             |              |              |             |              |              |
| <b>15</b>    | 0.178       | 0.107        | 0.295        | 0.154       | 0.085        | 0.277        | 0.131       | 0.067        | 0.260        |             |              |              |             |              |              |             |              |              |
| <b>20</b>    | 0.016       | 0.005        | 0.058        | 0.012       | 0.003        | 0.050        | 0.008       | 0.001        | 0.043        |             |              |              |             |              |              |             |              |              |
| <b>25</b>    | 0.001       | 0.000        | 0.008        | 0.000       | 0.000        | 0.006        | 0.000       | 0.000        | 0.005        |             |              |              |             |              |              |             |              |              |

Data is plotted in Figure 2 of the main article. *surv* = survival rate, *lower* = lower 95% confidence bound, *upper* = upper 95% confidence bound.

\* CAG length represents less than 1% of those onset HD onset in this age range. Estimate for this CAG length is an extrapolation from the survival model.

Supplemental Table 9. Survival curve estimates by CAG length for men with HD onset at age 45

| <b>CAG</b>   | <b>39*</b>  |              |              | <b>40</b>   |              |              | <b>41</b>   |              |              | <b>42</b>   |              |              | <b>43</b>   |              |              | <b>44</b>   |              |              |
|--------------|-------------|--------------|--------------|-------------|--------------|--------------|-------------|--------------|--------------|-------------|--------------|--------------|-------------|--------------|--------------|-------------|--------------|--------------|
| <b>years</b> | <i>surv</i> | <i>lower</i> | <i>upper</i> |
| <b>5</b>     | 0.963       | 0.952        | 0.974        | 0.960       | 0.949        | 0.972        | 0.957       | 0.945        | 0.969        | 0.953       | 0.941        | 0.966        | 0.950       | 0.936        | 0.963        | 0.946       | 0.931        | 0.960        |
| <b>10</b>    | 0.849       | 0.823        | 0.877        | 0.838       | 0.812        | 0.865        | 0.826       | 0.799        | 0.853        | 0.812       | 0.786        | 0.840        | 0.798       | 0.771        | 0.827        | 0.784       | 0.755        | 0.813        |
| <b>15</b>    | 0.626       | 0.578        | 0.677        | 0.601       | 0.556        | 0.650        | 0.576       | 0.533        | 0.623        | 0.550       | 0.509        | 0.596        | 0.524       | 0.482        | 0.568        | 0.496       | 0.454        | 0.541        |
| <b>20</b>    | 0.328       | 0.274        | 0.392        | 0.299       | 0.250        | 0.357        | 0.270       | 0.226        | 0.323        | 0.242       | 0.201        | 0.291        | 0.215       | 0.177        | 0.261        | 0.189       | 0.153        | 0.234        |
| <b>25</b>    | 0.143       | 0.102        | 0.198        | 0.121       | 0.087        | 0.169        | 0.101       | 0.072        | 0.143        | 0.084       | 0.058        | 0.120        | 0.068       | 0.046        | 0.100        | 0.054       | 0.035        | 0.084        |
| <b>CAG</b>   | <b>45</b>   |              |              | <b>46</b>   |              |              | <b>47</b>   |              |              | <b>48</b>   |              |              | <b>49*</b>  |              |              | <b>50*</b>  |              |              |
| <b>years</b> | <i>surv</i> | <i>lower</i> | <i>upper</i> |
| <b>5</b>     | 0.941       | 0.925        | 0.957        | 0.936       | 0.919        | 0.954        | 0.931       | 0.913        | 0.950        | 0.926       | 0.905        | 0.947        | 0.920       | 0.897        | 0.943        | 0.913       | 0.888        | 0.939        |
| <b>10</b>    | 0.768       | 0.737        | 0.799        | 0.751       | 0.718        | 0.785        | 0.733       | 0.696        | 0.772        | 0.714       | 0.673        | 0.758        | 0.694       | 0.648        | 0.744        | 0.673       | 0.621        | 0.730        |
| <b>15</b>    | 0.468       | 0.424        | 0.515        | 0.439       | 0.393        | 0.491        | 0.410       | 0.359        | 0.467        | 0.380       | 0.326        | 0.443        | 0.350       | 0.292        | 0.421        | 0.321       | 0.258        | 0.399        |
| <b>20</b>    | 0.164       | 0.129        | 0.209        | 0.141       | 0.107        | 0.187        | 0.120       | 0.086        | 0.167        | 0.100       | 0.068        | 0.148        | 0.083       | 0.052        | 0.132        | 0.067       | 0.039        | 0.117        |
| <b>25</b>    | 0.043       | 0.026        | 0.069        | 0.033       | 0.019        | 0.057        | 0.025       | 0.013        | 0.047        | 0.018       | 0.008        | 0.039        | 0.013       | 0.005        | 0.032        | 0.009       | 0.003        | 0.026        |
| <b>CAG</b>   | <b>51*</b>  |              |              | <b>52*</b>  |              |              | <b>53*</b>  |              |              | <b>54*</b>  |              |              | <b>55*</b>  |              |              | <b>56*</b>  |              |              |
| <b>years</b> | <i>surv</i> | <i>lower</i> | <i>upper</i> | <i>surv</i> | <i>lower</i> | <i>upper</i> | <i>surv</i> | <i>lower</i> | <i>upper</i> | <i>surv</i> | <i>upper</i> | <i>upper</i> | <i>surv</i> | <i>upper</i> | <i>upper</i> | <i>surv</i> | <i>upper</i> | <i>upper</i> |
| <b>5</b>     | 0.906       | 0.878        | 0.935        | 0.899       | 0.868        | 0.931        | 0.891       | 0.856        | 0.927        | 0.882       | 0.843        | 0.923        | 0.873       | 0.830        | 0.919        | 0.863       | 0.815        | 0.915        |
| <b>10</b>    | 0.652       | 0.593        | 0.716        | 0.629       | 0.563        | 0.702        | 0.605       | 0.531        | 0.688        | 0.580       | 0.498        | 0.674        | 0.554       | 0.465        | 0.660        | 0.527       | 0.430        | 0.646        |
| <b>15</b>    | 0.292       | 0.225        | 0.378        | 0.263       | 0.194        | 0.358        | 0.235       | 0.164        | 0.338        | 0.209       | 0.136        | 0.319        | 0.183       | 0.111        | 0.301        | 0.159       | 0.089        | 0.283        |
| <b>20</b>    | 0.054       | 0.028        | 0.103        | 0.042       | 0.019        | 0.091        | 0.032       | 0.013        | 0.080        | 0.024       | 0.008        | 0.070        | 0.018       | 0.005        | 0.061        | 0.013       | 0.003        | 0.053        |
| <b>25</b>    | 0.006       | 0.002        | 0.021        | 0.004       | 0.001        | 0.017        | 0.002       | 0.000        | 0.013        | 0.001       | 0.000        | 0.011        | 0.001       | 0.000        | 0.009        | 0.000       | 0.000        | 0.007        |
| <b>CAG</b>   | <b>57*</b>  |              |              | <b>58*</b>  |              |              | <b>59*</b>  |              |              |             |              |              |             |              |              |             |              |              |
| <b>years</b> | <i>surv</i> | <i>lower</i> | <i>upper</i> | <i>surv</i> | <i>lower</i> | <i>upper</i> | <i>surv</i> | <i>lower</i> | <i>upper</i> |             |              |              |             |              |              |             |              |              |
| <b>5</b>     | 0.853       | 0.799        | 0.910        | 0.841       | 0.782        | 0.906        | 0.829       | 0.763        | 0.902        |             |              |              |             |              |              |             |              |              |
| <b>10</b>    | 0.500       | 0.395        | 0.632        | 0.471       | 0.360        | 0.618        | 0.443       | 0.324        | 0.604        |             |              |              |             |              |              |             |              |              |
| <b>15</b>    | 0.136       | 0.070        | 0.266        | 0.115       | 0.053        | 0.249        | 0.096       | 0.039        | 0.234        |             |              |              |             |              |              |             |              |              |
| <b>20</b>    | 0.009       | 0.002        | 0.046        | 0.006       | 0.001        | 0.040        | 0.004       | 0.000        | 0.034        |             |              |              |             |              |              |             |              |              |
| <b>25</b>    | 0.000       | 0.000        | 0.005        | 0.000       | 0.000        | 0.004        | 0.000       | 0.000        | 0.003        |             |              |              |             |              |              |             |              |              |

Data is plotted in Figure 2 of the main article. *surv* = survival rate, *lower* = lower 95% confidence bound, *upper* = upper 95% confidence bound.

\* CAG length represents less than 1% of those onset HD onset in this age range. Estimate for this CAG length is an extrapolation from the survival model.

Supplemental Table 10. Survival curve estimates by CAG length for men with HD onset at age 55

| <b>CAG</b>   | <b>39</b>   |              |              | <b>40</b>   |              |              | <b>41</b>   |              |              | <b>42</b>   |              |              | <b>43</b>   |              |              | <b>44</b>   |              |              |
|--------------|-------------|--------------|--------------|-------------|--------------|--------------|-------------|--------------|--------------|-------------|--------------|--------------|-------------|--------------|--------------|-------------|--------------|--------------|
| <b>years</b> | <i>surv</i> | <i>lower</i> | <i>upper</i> |
| <b>5</b>     | 0.954       | 0.940        | 0.968        | 0.950       | 0.936        | 0.965        | 0.946       | 0.931        | 0.962        | 0.942       | 0.926        | 0.958        | 0.937       | 0.920        | 0.955        | 0.932       | 0.913        | 0.951        |
| <b>10</b>    | 0.814       | 0.782        | 0.848        | 0.801       | 0.769        | 0.834        | 0.786       | 0.753        | 0.819        | 0.770       | 0.737        | 0.805        | 0.753       | 0.719        | 0.789        | 0.736       | 0.700        | 0.774        |
| <b>15</b>    | 0.554       | 0.501        | 0.613        | 0.528       | 0.476        | 0.584        | 0.500       | 0.451        | 0.555        | 0.472       | 0.424        | 0.526        | 0.443       | 0.395        | 0.497        | 0.414       | 0.365        | 0.469        |
| <b>20</b>    | 0.246       | 0.195        | 0.311        | 0.219       | 0.172        | 0.278        | 0.193       | 0.150        | 0.246        | 0.168       | 0.129        | 0.218        | 0.144       | 0.109        | 0.192        | 0.123       | 0.090        | 0.168        |
| <b>25</b>    | 0.086       | 0.056        | 0.134        | 0.070       | 0.045        | 0.111        | 0.056       | 0.035        | 0.091        | 0.044       | 0.026        | 0.074        | 0.034       | 0.019        | 0.060        | 0.026       | 0.014        | 0.048        |
| <b>CAG</b>   | <b>45</b>   |              |              | <b>46*</b>  |              |              | <b>47*</b>  |              |              | <b>48*</b>  |              |              | <b>49*</b>  |              |              | <b>50*</b>  |              |              |
| <b>years</b> | <i>surv</i> | <i>lower</i> | <i>upper</i> |
| <b>5</b>     | 0.927       | 0.906        | 0.947        | 0.921       | 0.899        | 0.943        | 0.914       | 0.890        | 0.939        | 0.907       | 0.881        | 0.935        | 0.900       | 0.871        | 0.930        | 0.892       | 0.860        | 0.926        |
| <b>10</b>    | 0.717       | 0.678        | 0.758        | 0.697       | 0.655        | 0.743        | 0.677       | 0.630        | 0.727        | 0.655       | 0.603        | 0.711        | 0.632       | 0.574        | 0.696        | 0.608       | 0.544        | 0.680        |
| <b>15</b>    | 0.384       | 0.334        | 0.443        | 0.355       | 0.302        | 0.417        | 0.325       | 0.269        | 0.393        | 0.296       | 0.237        | 0.370        | 0.267       | 0.206        | 0.347        | 0.239       | 0.176        | 0.326        |
| <b>20</b>    | 0.103       | 0.072        | 0.147        | 0.085       | 0.056        | 0.129        | 0.069       | 0.043        | 0.112        | 0.055       | 0.031        | 0.097        | 0.043       | 0.022        | 0.084        | 0.033       | 0.015        | 0.073        |
| <b>25</b>    | 0.019       | 0.009        | 0.038        | 0.014       | 0.006        | 0.031        | 0.009       | 0.004        | 0.024        | 0.006       | 0.002        | 0.019        | 0.004       | 0.001        | 0.015        | 0.003       | 0.001        | 0.012        |
| <b>CAG</b>   | <b>51*</b>  |              |              | <b>52*</b>  |              |              | <b>53*</b>  |              |              | <b>54*</b>  |              |              | <b>55*</b>  |              |              | <b>56*</b>  |              |              |
| <b>years</b> | <i>surv</i> | <i>lower</i> | <i>upper</i> | <i>surv</i> | <i>lower</i> | <i>upper</i> | <i>surv</i> | <i>lower</i> | <i>upper</i> | <i>surv</i> | <i>upper</i> | <i>upper</i> | <i>surv</i> | <i>upper</i> | <i>upper</i> | <i>surv</i> | <i>upper</i> | <i>upper</i> |
| <b>5</b>     | 0.884       | 0.848        | 0.921        | 0.875       | 0.835        | 0.916        | 0.865       | 0.820        | 0.912        | 0.854       | 0.805        | 0.907        | 0.843       | 0.788        | 0.902        | 0.831       | 0.770        | 0.897        |
| <b>10</b>    | 0.583       | 0.512        | 0.665        | 0.558       | 0.479        | 0.649        | 0.531       | 0.445        | 0.633        | 0.504       | 0.411        | 0.618        | 0.476       | 0.375        | 0.602        | 0.447       | 0.340        | 0.587        |
| <b>15</b>    | 0.212       | 0.148        | 0.305        | 0.187       | 0.122        | 0.285        | 0.162       | 0.099        | 0.266        | 0.139       | 0.078        | 0.248        | 0.118       | 0.060        | 0.231        | 0.099       | 0.045        | 0.215        |
| <b>20</b>    | 0.025       | 0.010        | 0.063        | 0.018       | 0.006        | 0.054        | 0.013       | 0.004        | 0.046        | 0.009       | 0.002        | 0.039        | 0.006       | 0.001        | 0.033        | 0.004       | 0.001        | 0.028        |
| <b>25</b>    | 0.002       | 0.000        | 0.009        | 0.001       | 0.000        | 0.007        | 0.001       | 0.000        | 0.005        | 0.000       | 0.000        | 0.004        | 0.000       | 0.000        | 0.003        | 0.000       | 0.000        | 0.002        |
| <b>CAG</b>   | <b>57*</b>  |              |              | <b>58*</b>  |              |              | <b>59*</b>  |              |              |             |              |              |             |              |              |             |              |              |
| <b>years</b> | <i>surv</i> | <i>lower</i> | <i>upper</i> | <i>surv</i> | <i>lower</i> | <i>upper</i> | <i>surv</i> | <i>lower</i> | <i>upper</i> |             |              |              |             |              |              |             |              |              |
| <b>5</b>     | 0.853       | 0.799        | 0.910        | 0.841       | 0.782        | 0.906        | 0.829       | 0.763        | 0.882        |             |              |              |             |              |              |             |              |              |
| <b>10</b>    | 0.500       | 0.395        | 0.632        | 0.471       | 0.360        | 0.618        | 0.443       | 0.324        | 0.541        |             |              |              |             |              |              |             |              |              |
| <b>15</b>    | 0.136       | 0.070        | 0.266        | 0.115       | 0.053        | 0.249        | 0.096       | 0.039        | 0.171        |             |              |              |             |              |              |             |              |              |
| <b>20</b>    | 0.009       | 0.002        | 0.046        | 0.006       | 0.001        | 0.040        | 0.004       | 0.000        | 0.017        |             |              |              |             |              |              |             |              |              |
| <b>25</b>    | 0.000       | 0.000        | 0.005        | 0.000       | 0.000        | 0.004        | 0.000       | 0.000        | 0.001        |             |              |              |             |              |              |             |              |              |

Data is plotted in Figure 2 of the main article. *surv* = survival rate, *lower* = lower 95% confidence bound, *upper* = upper 95% confidence bound.

\* CAG length represents less than 1% of those onset HD onset in this age range. Estimate for this CAG length is an extrapolation from the survival model.

Supplemental Table 11. Final Model in main paper

| Variable          | log HR  | S.E.   | z      | p val    | HR    | 95% CI |        |
|-------------------|---------|--------|--------|----------|-------|--------|--------|
| CAG (per repeat)  | 0.1227  | 0.0134 | 9.157  | 5.34E-20 | 1.131 | 1.101  | 1.161  |
| Age of HD Onset   | 0.0704  | 0.0124 | 5.677  | 1.37E-08 | 1.073 | 1.047  | 1.099  |
| Age of HD Onset'  | -0.1191 | 0.0265 | -4.494 | 6.99E-06 | 0.888 | 0.843  | 0.935  |
| Age of HD Onset'' | 0.5751  | 0.1113 | 5.167  | 2.38E-07 | 1.777 | 1.429  | 2.211  |
| Men vs Women      | 2.2965  | 0.5782 | 3.972  | 7.13E-05 | 9.939 | 3.200  | 30.868 |
| CAG by (M vs W)   | -0.0422 | 0.0127 | -3.323 | 8.91E-04 | 0.959 | 0.935  | 0.983  |

Abbreviations: *HR* = hazard ratio, *S.E* = standard error, *CI* = confidence interval, *p val* = p value, *M* = men, *W* = women. In p values, *XE-Y* indicates *X* times 10 to the *-Y* power (scientific notation). For age of HD onset, restricted cubic spline knots were placed at 23.05, 40.00, 50.00 and 65.00 years of age. *Age of HD Onset'* and *Age of HD Onset''* are the nonlinear restricted cubic spline coefficients for age of HD onset.

Supplemental Table 12. Model with 105 questionable cases of HD onset removed

| Variable          | log HR  | S.E.   | z      | p val   | HR    | 95% CI |        |
|-------------------|---------|--------|--------|---------|-------|--------|--------|
| CAG (per repeat)  | 0.124   | 0.0134 | 9.254  | <0.0001 | 1.132 | 1.103  | 1.162  |
| Age of HD Onset   | 0.0712  | 0.0122 | 5.836  | <0.0001 | 1.074 | 1.048  | 1.100  |
| Age of HD Onset'  | -0.1276 | 0.0278 | -4.590 | <0.0001 | 0.880 | 0.834  | 0.929  |
| Age of HD Onset'' | 0.5777  | 0.1107 | 5.219  | <0.0001 | 1.782 | 1.434  | 2.214  |
| Men vs Women      | 2.2935  | 0.5775 | 3.971  | <0.0001 | 9.910 | 3.195  | 30.733 |
| CAG by (M vs W)   | -0.0421 | 0.0127 | -3.315 | 0.0009  | 0.959 | 0.935  | 0.983  |

Abbreviations: *HR* = hazard ratio, *S.E* = standard error, *CI* = confidence interval, *p val* = p value, *M* = men, *W* = women. For age of HD onset, restricted cubic spline knots were placed at 23.05, 40.00, 50.00 and 65.00 years of age. *Age of HD Onset'* and *Age of HD Onset''* are the nonlinear restricted cubic spline coefficients for age of HD onset.

Supplemental Table 13, Model with data restricted to CAG lengths 41 through 56

| Variable          | log HR  | S.E.   | z      | p val   | HR    | 95% CI |        |
|-------------------|---------|--------|--------|---------|-------|--------|--------|
| CAG (per repeat)  | 0.1292  | 0.0218 | 5.927  | <0.0001 | 1.138 | 1.090  | 1.188  |
| Age of HD Onset   | 0.0648  | 0.0109 | 5.945  | <0.0001 | 1.067 | 1.044  | 1.090  |
| Age of HD Onset'  | -0.1011 | 0.0457 | -2.212 | 0.0268  | 0.904 | 0.826  | 0.989  |
| Age of HD Onset'' | 0.395   | 0.1695 | 2.330  | 0.0198  | 1.484 | 1.065  | 2.069  |
| Men vs Women      | 2.1869  | 0.9854 | 2.219  | 0.0268  | 8.908 | 1.291  | 61.448 |
| CAG by (M vs W)   | -0.0391 | 0.0218 | -1.794 | 0.0733  | 0.962 | 0.921  | 1.004  |

Abbreviations: *HR* = hazard ratio, *S.E* = standard error, *CI* = confidence interval, *p val* = p value, *M* = men, *W* = women. In p values, *XE-Y* indicates *X* times 10 to the *-Y* power (scientific notation). For age of HD onset, restricted cubic spline knots were placed at 23.05, 40.00, 50.00 and 65.00 years of age. *Age of HD Onset'* and *Age of HD Onset''* are the nonlinear restricted cubic spline coefficients for age of HD onset.

Supplemental Table 14. Model controlling for (non-significant) effect of CAG length on the short allele

| Variable                      | log HR  | S.E.   | z      | p val    | HR     | 95% CI |        |
|-------------------------------|---------|--------|--------|----------|--------|--------|--------|
| CAG (per repeat)              | 0.1272  | 0.0142 | 8.958  | <0.0001  | 1.136  | 1.104  | 1.168  |
| Age of HD Onset               | 0.0764  | 0.0135 | 5.659  | <0.0001  | 1.079  | 1.051  | 1.108  |
| Age of HD Onset'              | -0.1261 | 0.0288 | -4.378 | <0.0001  | 0.882  | 0.833  | 0.933  |
| Age of HD Onset''             | 0.5912  | 0.1205 | 4.906  | <0.0001  | 1.806  | 1.426  | 2.287  |
| Men vs Women                  | 2.3517  | 0.6148 | 3.825  | 1.00E-04 | 10.503 | 3.148  | 35.045 |
| CAG by (M vs W)               | -0.0426 | 0.0135 | -3.156 | 1.60E-03 | 0.958  | 0.933  | 0.984  |
| CAG short allele (per repeat) | 0.0091  | 0.0104 | 0.875  | 3.78E-01 | 1.009  | 0.989  | 1.030  |

Abbreviations: *HR* = hazard ratio, *S.E* = standard error, *CI* = confidence interval, *p val* = p value, *M* = men, *W* = women. In p values, *XE-Y* indicates *X* times 10 to the *-Y* power (scientific notation). For age of HD onset, restricted cubic spline knots were placed at 23.05, 40.00, 50.00 and 65.00 years of age. *Age of HD Onset'* and *Age of HD Onset''* are the nonlinear restricted cubic spline coefficients for age of HD onset.

Supplemental Table 15. Model controlling for data subset within Registry HD

| Variable               | log HR  | S.E.   | z      | p val   | HR    | 95% CI |        |
|------------------------|---------|--------|--------|---------|-------|--------|--------|
| CAG (per repeat)       | 0.1078  | 0.0137 | 7.869  | <0.0001 | 1.114 | 1.084  | 1.144  |
| Age of HD Onset        | 0.0639  | 0.0124 | 5.153  | <0.0001 | 1.066 | 1.040  | 1.092  |
| Age of HD Onset'       | -0.0954 | 0.0263 | -3.627 | 0.0003  | 0.909 | 0.863  | 0.957  |
| Age of HD Onset''      | 0.4791  | 0.1114 | 4.301  | <0.0001 | 1.615 | 1.298  | 2.009  |
| Men vs Women           | 1.9171  | 0.5836 | 3.285  | 0.001   | 6.801 | 2.167  | 21.347 |
| CAG-by-(M vs W)        | -0.0348 | 0.0129 | -2.698 | 0.0068  | 0.966 | 0.942  | 0.991  |
| R3 vs R2 data source   | -0.9545 | 0.2566 | -3.720 | 0.0002  | 0.385 | 0.233  | 0.637  |
| Onset Age * (R3 vs R2) | -0.0041 | 0.0054 | -0.759 | 0.4496  | 0.996 | 0.985  | 1.007  |

Abbreviations: *HR* = hazard ratio, *S.E* = standard error, *CI* = confidence interval, *p val* = p value, *M* = men, *W* = women. In p values, *XE-Y* indicates *X* times 10 to the *-Y* power (scientific notation). For age of HD onset, restricted cubic spline knots were placed at 23.05, 40.00, 50.00 and 65.00 years of age. *Age of HD Onset'* and *Age of HD Onset''* are the nonlinear restricted cubic spline coefficients for age of HD onset. The exploratory variable of interest is the interaction between Onset Age and R3 vs R2 because the concern is that different methods for recording age of onset were used in these two subsets of registry-HD. In an additional model (not shown in a table) we tested the possible significance of an interaction of data source and all three onset age spline terms used to define the nonlinear details of the effect of onset age on survival. This interaction was not significant (Chi-Square = 1.31, 3df, p = .726.)

Supplemental Table 16. Model with Rater Estimate of Onset Age Used Throughout (Rather than Rater Age for Subset R2 and Motor Onset Age For R3)

| Variable          | log HR  | S.E.   | z      | p val   | HR    | 95% CI |        |
|-------------------|---------|--------|--------|---------|-------|--------|--------|
| CAG (per repeat)  | 0.0948  | 0.0143 | 6.629  | <0.0001 | 1.099 | 1.069  | 1.131  |
| Age of HD Onset   | 0.0478  | 0.013  | 3.677  | 0.0002  | 1.049 | 1.023  | 1.076  |
| Age of HD Onset'  | -0.0978 | 0.0293 | -3.338 | 0.0009  | 0.907 | 0.856  | 0.960  |
| Age of HD Onset'' | 0.4401  | 0.1075 | 4.094  | <0.0001 | 1.553 | 1.258  | 1.917  |
| Men vs Women      | 2.2104  | 0.6101 | 3.623  | 0.0003  | 9.119 | 2.758  | 30.148 |
| CAG-by-(M vs W)   | -0.0405 | 0.0134 | -3.022 | 0.0026  | 0.960 | 0.935  | 0.986  |

Abbreviations: *HR* = hazard ratio, *S.E* = standard error, *CI* = confidence interval, *p val* = p value, *M* = men, *W* = women. In p values, *XE-Y* indicates *X* times 10 to the *-Y* power (scientific notation). For age of HD onset, restricted cubic spline knots were placed at 23.05, 40.00, 50.00 and 65.00 years of age. Because the data were less complete, use of rater onset age rather than motor onset age reduced the sample to 804 deaths out of 7904 observations rather than 826 deaths in 8422 observations.

The two onset ages were are highly correlated. For the 6582 participants from R3 for whom both rater and motor ages were recorded, the Pearson correlation between the two was 0.949 and the standard deviation of the age differences was 3.976 years. The mean motor onset age was 1.17 years older that the rater-reported onset. The correlation between R2 rater onset and R3 motor onset ages was 0.962 among 807 overlapping participants with ages recorded in both data subsets. The standard deviation of the difference was 3.302 years.

Supplemental Table 17 Model with cluster effect for country in which data was collected

| Variable          | log HR  | S.E.   | z      | p val   | HR     | 95% CI |        |
|-------------------|---------|--------|--------|---------|--------|--------|--------|
| CAG (per repeat)  | 0.1247  | 0.0129 | 9.667  | <0.0001 | 1.133  | 1.105  | 1.162  |
| Age of HD Onset   | 0.0702  | 0.0071 | 9.887  | <0.0001 | 1.073  | 1.058  | 1.088  |
| Age of HD Onset'  | -0.1169 | 0.0211 | -5.540 | <0.0001 | 0.890  | 0.854  | 0.927  |
| Age of HD Onset'' | 0.5636  | 0.0952 | 5.920  | <0.0001 | 1.757  | 1.458  | 2.117  |
| Men vs Women      | 2.3912  | 0.4178 | 5.723  | <0.0001 | 10.927 | 4.818  | 24.780 |
| CAG by (M vs W)   | -0.0441 | 0.0088 | -5.011 | <0.0001 | 0.957  | 0.940  | 0.974  |

Abbreviations: *HR* = hazard ratio, *S.E* = standard error, *CI* = confidence interval, *p val* = p value, *M* = men, *W* = women. In p values, *XE-Y* indicates *X* times 10 to the *-Y* power (scientific notation). For age of HD onset, restricted cubic spline knots were placed at 23.05, 40.00, 50.00 and 65.00 years of age. *Age of HD Onset'* and *Age of HD Onset''* are the nonlinear restricted cubic spline coefficients for age of HD onset.



Supplemental Table 18. Model with cluster effect for site at which data was collected

| Variable          | log HR  | S.E.   | z      | p val   | HR     | 95% CI |        |
|-------------------|---------|--------|--------|---------|--------|--------|--------|
| CAG (per repeat)  | 0.1247  | 0.0109 | 11.440 | <0.0001 | 1.133  | 1.109  | 1.157  |
| Age of HD Onset   | 0.0702  | 0.0112 | 6.268  | <0.0001 | 1.073  | 1.049  | 1.097  |
| Age of HD Onset'  | -0.1168 | 0.0285 | -4.098 | <0.0001 | 0.890  | 0.841  | 0.941  |
| Age of HD Onset'' | 0.5634  | 0.1292 | 4.361  | <0.0001 | 1.757  | 1.364  | 2.263  |
| Men vs Women      | 2.3905  | 0.4638 | 5.154  | <0.0001 | 10.919 | 4.400  | 27.099 |
| CAG by (M vs W)   | -0.0441 | 0.0098 | -4.500 | <0.0001 | 0.957  | 0.939  | 0.975  |

Abbreviations: *HR* = hazard ratio, *S.E* = standard error, *CI* = confidence interval, *p val* = p value, *M* = men, *W* = women. In p values, *XE-Y* indicates *X* times 10 to the *-Y* power (scientific notation). For age of HD onset, restricted cubic spline knots were placed at 23.05, 40.00, 50.00 and 65.00 years of age. *Age of HD Onset'* and *Age of HD Onset''* are the nonlinear restricted cubic spline coefficients for age of HD onset.

Supplemental Table 19. Consistency of the effect of the estimated effect of CAG-length on Survival, Regardless of Model Adjustments.

| Table | Model                                               | Variable         | log HR | S.E.   | z     | p val   | HR    | 95% CI |       |
|-------|-----------------------------------------------------|------------------|--------|--------|-------|---------|-------|--------|-------|
| 2     | Final Model                                         | CAG (per repeat) | 0.1227 | 0.0134 | 9.157 | <0.0001 | 1.131 | 1.101  | 1.161 |
| 3     | 105 questionable cases removed                      | CAG (per repeat) | 0.1240 | 0.0134 | 9.254 | <0.0001 | 1.132 | 1.103  | 1.162 |
| 4     | CAG restricted to 41 to 56 range                    | CAG (per repeat) | 0.1292 | 0.0218 | 5.927 | <0.0001 | 1.138 | 1.090  | 1.188 |
| 5     | Adjust for short allele CAG length                  | CAG (per repeat) | 0.1272 | 0.0142 | 8.958 | <0.0001 | 1.136 | 1.104  | 1.168 |
| 6     | Adjust for Registry-HD data subset                  | CAG (per repeat) | 0.1078 | 0.0137 | 7.869 | <0.0001 | 1.114 | 1.084  | 1.144 |
| 7     | Rater's onset age used in both data subsets         | CAG (per repeat) | 0.0948 | 0.0143 | 6.629 | <0.0001 | 1.099 | 1.069  | 1.131 |
| 8     | Adjust significance for clustering within countries | CAG (per repeat) | 0.1247 | 0.0129 | 9.667 | <0.0001 | 1.133 | 1.105  | 1.162 |
| 9     | Adjust significance for clustering by study site    | CAG (per repeat) | 0.1247 | 0.0109 | 11.44 | <0.0001 | 1.133 | 1.109  | 1.157 |

Abbreviations: *HR* = hazard ratio, *S.E* = standard error, *CI* = confidence interval, *p val* = p value, *M* = men, *W* = women.

Supplemental Table 20. Consistency of the Interaction Effect of CAG Length and Sex on Survival, Regardless of Model Adjustments

| Table | Model                                               | Variable        | log HR  | S.E.   | z      | p val    | HR    | 95% CI |       |
|-------|-----------------------------------------------------|-----------------|---------|--------|--------|----------|-------|--------|-------|
| 2     | Final Model                                         | CAG by (M vs W) | -0.0422 | 0.0127 | -3.323 | 0.000891 | 0.959 | 0.935  | 0.983 |
| 3     | 105 questionable cases removed                      | CAG by (M vs W) | -0.0421 | 0.0127 | -3.315 | 0.0009   | 0.959 | 0.935  | 0.983 |
| 4     | CAG restricted to 41 to 56 range                    | CAG by (M vs W) | -0.0391 | 0.0218 | -1.794 | 0.0733   | 0.962 | 0.921  | 1.004 |
| 5     | Adjust for short allele CAG length                  | CAG by (M vs W) | -0.0426 | 0.0135 | -3.156 | 0.0016   | 0.958 | 0.933  | 0.984 |
| 6     | Adjust for Registry-HD data subset                  | CAG by (M vs W) | -0.0348 | 0.0129 | -2.698 | 0.0068   | 0.966 | 0.942  | 0.991 |
| 7     | Rater's onset age used in both data subsets         | CAG by (M vs W) | -0.0405 | 0.0134 | -3.022 | 0.0026   | 0.96  | 0.935  | 0.986 |
| 8     | Adjust significance for clustering within countries | CAG by (M vs W) | -0.0441 | 0.0088 | -5.011 | <0.0001  | 0.957 | 0.940  | 0.974 |
| 9     | Adjust significance for clustering by study site    | CAG by (M vs W) | -0.0441 | 0.0098 | -4.5   | <0.0001  | 0.957 | 0.939  | 0.975 |

Abbreviations: *HR* = hazard ratio, *S.E* = standard error, *CI* = confidence interval, *p val* = p value, *M* = men, *W* = women.

## Methods for simulating the effects of imprecise age of onset upon survival from onset.

The age of “onset” of Huntington’s disease, is vaguely defined. In many HD studies, including the R3 portion of Registry, estimates of onset age from more than one source are recorded. An implicit assumption in current and many other HD analyses is that this age of onset corresponds to a critical change in biological disease state that occurs at a more precise age. (Although progressive changes in many biological measures of HD are documented, the measures corresponding to this hypothetical biological state change have not been identified.)

Such measurement error effects are especially relevant to the current analysis because they represent more than a loss of precision in a predictor variable. There is a perfect negative correlation between error in the age of onset and error in the length of survival after onset, which is the outcome measure of interest. In the context of Cox proportional hazard modelling, this greatly complicates any attempt to assess measurement error impact by incorporating it into the underlying mathematical equations. We have thus turned to a simulation study to gain insight.

If we assume that the assumption of an underlying critical biological change is correct, then we can assess the effects of errors in the reported ages of onset relative to the age at which the biological change occurs. We do this by assuming that the ages of onset in our data are indeed the correct underlying ages. We then add random error to these ages repeatedly and record the consequent change in analysis results.

We estimate the standard deviation of reported age around true age using the differences between the variables “age of motor onset” and “rater estimate of onset age” within the R3 portion of the Registry data (Supplemental figure 2). Although the correlation between the two ages is 0.949, the standard deviation of the age differences is 3.98 years. If measurement error in the two reported ages were statistically independent and thus uncorrelated, then the standard deviation of reported ages around the true age would be  $3.98/\text{square-root}(2) = 2.81$  years. We used this as the standard deviation of normally distributed, measurement errors in the current simulation. We repeated the simulation 1000 times.

The simulation provides estimates of expected bias in the original log hazard ratio and statistical significance estimates. The ratio of the mean simulation parameters to those obtained from the original data is an estimate of the analogous ratio between the parameters from original data and the hypothetical underlying true onset ages. The adjusted parameter estimates are obtained by dividing the original log hazard and z values by these ratios. Results are summarized in supplemental table 20. In model 1, before including age of onset in the model, the estimated strength and significance of the main effect of CAG-Length increases slightly. Adding age-of-onset as a predictor (model 2), the simulation suggests that the effects of both CAG repeat length and age-of-onset as survival predictors are slight overestimates. However, the adjusted log hazard ratio CAG estimate (0.076 per CAG repeat) retains overwhelming statistical significance ( $p = 6.27 * 10^{-17}$ ). The same is true for the CAG estimate in model 3, where the influence of age of onset is modelled as a nonlinear spline and an interaction between CAG length and sex is also fit.

Figure S2. Correlation between motor onset age and rater’s estimate of onset age within the R3 Registry HD data.

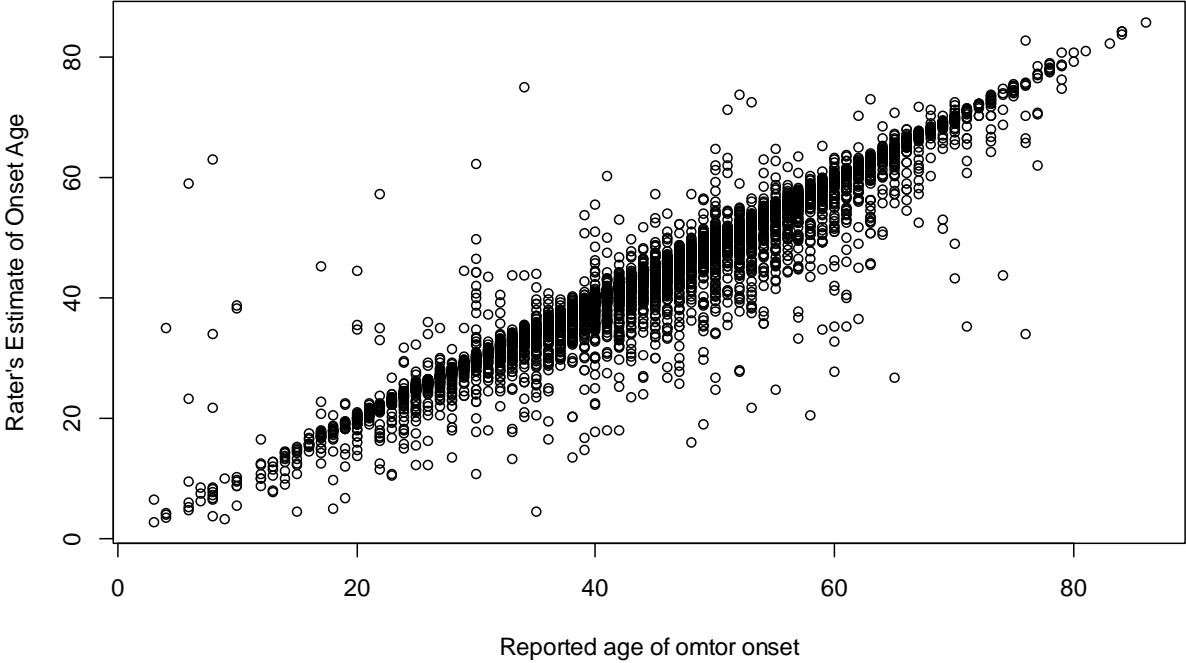

Supplemental Table 21. Comparison of measurement error simulation estimates to original model estimates.

| <b>Model 1</b>    | <b>Estimates</b> |          |              | <b>Simulation Ratios</b> |          | <b>Adjusted Estimates</b> |          |              |
|-------------------|------------------|----------|--------------|--------------------------|----------|---------------------------|----------|--------------|
| <b>Variable</b>   | <b>log HR</b>    | <b>z</b> | <b>p val</b> | <b>log HR</b>            | <b>Z</b> | <b>log HR</b>             | <b>z</b> | <b>p val</b> |
| CAG (per repeat)  | 0.022            | 3.195    | 1.40E-03     | 0.932                    | 0.934    | 0.024                     | 3.417    | 6.34E-04     |
| Men vs Women      | 0.359            | 5.066    | 4.07E-07     | 0.998                    | 0.996    | 0.359                     | 5.090    | 3.58E-07     |
| <b>Model 2</b>    |                  |          |              |                          |          |                           |          |              |
| <b>Variable</b>   | <b>log HR</b>    | <b>z</b> | <b>p val</b> | <b>log HR</b>            | <b>Z</b> | <b>log HR</b>             | <b>z</b> | <b>p val</b> |
| CAG (per repeat)  | 0.083            | 9.604    | 7.69E-22     | 1.099                    | 1.148    | 0.076                     | 8.363    | 6.27E-17     |
| Men vs Women      | 0.369            | 5.201    | 1.98E-07     | 0.991                    | 0.989    | 0.372                     | 5.256    | 1.47E-07     |
| Age of HD Onset   | 0.036            | 8.980    | 2.71E-19     | 1.168                    | 1.205    | 0.031                     | 7.455    | 8.99E-14     |
| <b>Model 3</b>    |                  |          |              |                          |          |                           |          |              |
| <b>Variable</b>   | <b>log HR</b>    | <b>z</b> | <b>p val</b> | <b>log HR</b>            | <b>Z</b> | <b>log HR</b>             | <b>z</b> | <b>p val</b> |
| CAG (per repeat)  | 0.123            | 9.157    | 5.34E-20     | 1.069                    | 1.136    | 0.115                     | 8.043    | 8.88E-16     |
| Age of HD Onset   | 0.070            | 5.677    | 1.37E-08     | 1.080                    | 1.116    | 0.065                     | 5.088    | 3.61E-07     |
| Age of HD Onset'  | -0.119           | -4.494   | 6.99E-06     | 1.016                    | 0.981    | -0.117                    | -4.585   | 4.53E-06     |
| Age of HD Onset'' | 0.575            | 5.167    | 2.38E-07     | 0.934                    | 0.959    | 0.616                     | 5.389    | 7.07E-08     |
| Men vs Women      | 2.297            | 3.972    | 7.13E-05     | 0.983                    | 1.026    | 2.335                     | 3.869    | 1.09E-04     |
| CAG by (M vs W)   | -0.042           | -3.323   | 8.91E-04     | 0.984                    | 1.025    | -0.043                    | -3.240   | 1.19E-03     |

*Simulation ratios* are the mean parameters over 1000 simulations divided by the parameter estimate obtained from the original data.

Abbreviations: *HR* = hazard ratio, *S.E* = standard error, *CI* = confidence interval, *p val* = p value, *M* = men, *W* = women. In p values, *XE-Y* indicates *X* times 10 to the *-Y* power (scientific notation). For age of HD onset in Model 3, restricted cubic spline knots were placed at the quantiles (.05, .35, .65, .95) of age of onset. In the original data these quantiles correspond to 23.05, 40.00, 50.00 and 65.00 years of age. These values varied among the simulations, due to adding random noise to the ages of onset. *Age of HD Onset'* and *Age of HD Onset''* are the nonlinear restricted cubic spline coefficients for age of HD onset.

## The Registry investigators of the European Huntington's Disease Network

Registry Steering committee: G. Bernhard Landwehrmeyer (PI), Anne-Catherine Bachoud-Lévi, Anna-Rita Bentivoglio, Ida Biunno, Raphael M. Bonelli, Juliana Bronzova, Jean-Marc Burgunder, Stephen B. Dunnett, Joaquim J. Ferreira, Jan Frich, Joe Giuliano, Olivia J. Handley, Arvid Heiberg, Sergey Illarioshkin, Torsten Illmann, Jiri Klempir, Jamie Levey, Tim McLean, Jørgen E. Nielsen, Susana Pro Koivisto, Markku Päivärinta, Sven Pålhagen, Oliver Quarrell, Maria Ramos-Arroyo, Raymund A.C. Roos, Carsten Saft, Ana Rojo Sebastián, Sarah J. Tabrizi, Wim Vandenberghe, Christine Verellen-Dumoulin, Tereza Uhrova, Jan Wahlström+, Jacek Zaremba Language coordinators: Verena Baake (formerly Rödiger), Katrin Barth, Monica Bascuñana Garde, Kristina Becanovic, Tomáš Bernard, Sabrina Betz, Reineke Bos, Adrien Come, Leonor Correia Guedes, Jenny Callaghan, Selene Capodarca, Sébastien Charpentier, Wildson Vieira da Silva, Martina Di Renzo, Daniel Ecker, Ana Maria Finisterra,, Ruth Fullam, Camille Genoves, Mette Gilling, Olivia J Handley, Andrea Horta, Carina Hvalstedt, Christine Held, Hasina Hussain, Kerstin Koppers, Claudia Lamanna, Matilde Laurà, Asunción Martínez Descals, Saul Martinez-Horta, Tiago Mestre, Sara Minster, Daniela Monza, Kristina Munkel, Lisanne Mütze, Martin Oehmen, Helene Padiou, Laurent Paterski, Nadia Peppia, Susana Pro Koivisto, Beate Rindal, Dawn Rogers, Niini Røren (formerly Heinonen), Ana Salgueiro, Pavla Šašinková, Yury Seliverstov, Catherine Taylor, Erika Timewell, Jenny Townhill, Patricia Trigo Cubillo, Marleen R van Walsem, Marie-Noelle Witjes-Ané, Grzegorz Witkowski, Abigail Wright, Elizaveta Yudina, Daniel Zielonka, Eugeniusz Zielonka, Paola Zinzi Legacy database team: Daisy De Abreu, Gunter Antoneag, Katrin Barth, Sabrina Betz, Jean-Marc Burgunder, Christine Capper-Loup, Luís Garcez Ferreira, Nilza Gonçalves, Torsten Illmann, Raquel Lobo, Jürgen Nagler-Ihle, Eileen Neacy, Ana Teresa Santos, Jan Tuschhoff, Jennifer Ware AUSTRIA Graz (Medizinische Universitäts Graz, Psychiatrie): Raphael M. Bonelli, Karen Hecht, Brigitte Herranhof, Anna Holl (formerly Hödl), Hans-Peter Kapfhammer, Michael Koppitz, Sabine Lilek, Markus Magnet, Nicole Müller, Daniela Otti, Annamaria Painold, Karin Reisinger, Monika Scheibl, Helmut Schöggel, Jasmin Ullah Innsbruck (Universitätsklinik Innsbruck, Neurologie): Eva-Maria Braunwarth, Florian Brugger, Lisa Buratti, Eva-Maria Hametner, Caroline Hepperger, Christiane Holas, Anna Hotter, Anna Hussl, Barbara Larcher, Philipp Mahlknecht, Christoph Müller, Bernadette Pinter, Werner Poewe, Eva-Magdalena Reiter, Klaus Seppi, Fabienne Sprenger, Gregor Wenning Salzburg (Christian-Doppler-Klinik Salzburg, Universitätsklinikum der PMU, Universitätsklinik für Neurologie): Raphael M. Bonelli, Gunther Ladurner, Stefan Lilek, Daniela Sinadinosa, Wolfgang Staffen, Anna Maria Walleczek Vienna-UNI: Christoph Linder, Walter Pirker BELGIUM Bierbeek: Dirk Liessens, Godelinde Calmeyn, Nele Somers, Isabelle Delvaux, Andrea Boogaerts Bruxelles (Vrije Universiteit Brussel): Anja Flamez, Sylvie de Raedt REGISTRY contributors 2014-2017 Page 2 of 11 Oberer Eselsberg 45/1 · 89081 Ulm · Germany Phone +49 (0)731 500-63101 · Fax +49 (0)731 500-63082 · www.euro-hd.net Bruxelles (Erasmus) : Nick Alaerts, Hichem Slama, Frédéric Supiot Bruxelles (St-Luc) : Eric Constant, Anne-Françoise Gillardin, Marie-Claude Léonard, Christine Verellen-Dumoulin, Françoise van de Wyngaerde Charleroi (Institut de Pathologie et de Génétique (IPG)): Michel Dupuis, Cécile Minet, Pascale Ribai, Dominique Van Paemel, Christine Verellen-Dumoulin Leuven (Universitair Ziekenhuis Gasthuisberg): Andrea Boogaerts, Wim Vandenberghe, Dimphna van Reijen, Petra Weckx CZECH REPUBLIC Olomouc (Neurologická klinika, Fakultní nemocnice Olomouc): Michaela Kaiserova, Zuzana Šenkárová Prague (Extrapyramidové centrum, Neurologická klinika, 1. LF UK a VFN): Ondřej Bezdíček, Jiří Klempíř, Olga Klempířová, Veronika Majerová-Ibarburu, Tomáš Nikolai, Jan Roth,

Irena Stárková DENMARK Aarhus (Aarhus University Hospital): Louise Hasselstrøm Madsen, Anette Torvin Møller Copenhagen University Hospital (Rigshospitalet, Memory clinic): Lena Hjermind, Oda Jacobsen, Ida Unmack Larsen, Suzanne Lindquist, Jørgen Nielsen, Lisbeth Regeur, Peter Roos, Jette Stockholm, Christina Vangsted-Hansen, Tua Vinther-Jensen Odense (Odense University Hospital): Annette Lolk, Marianne Lundsgaard, Lene Wermuth FINLAND Aland: Christian Andersson, Clara Nyberg, Jimmy Sundblom Helsinki - Vaestoliitto (Department of Medical Genetics): Maarit Peippo, Marjatta Sipponen Kuopio: Anu Bruun, Paivi Hartikainen, Seija Mäkipää, Mari Ollokainen Oulu (Dep. of Neurology): Jaana Åman, Mikko Kärppä Oulu (Dep. of Medical Genetics): Jaakko Ignatius, Outi Jääskeläinen, Outi Kajula, Jukka Moilanen, Aki Mustonen Tampere (Terveystalo Healthcare Service Centre): Maire Santala Turku-Suvituuli (Rehabilitation Centre Suvituuli): Pia Eklund, Heli Hiivola, Hannele Hyppönen, Kirsti Martikainen, Marjut Ojala, Sirkku Tähkäpää, Katri Tuuha FRANCE Angers (Centre de référence des maladies neurogénétique- CHU d'Angers): Philippe Allain, Dominique Bonneau, Marie Bost, Bénédicte Gohier, Marie-Anne Guérid, Audrey Olivier, Julie Prouzet, Adriana Prundean, Clarisse Scherer-Gagou, Christophe Verny Bordeaux (Hôpital Pellegrin): Blandine Babiloni, Déborah Bled, Sabrina Debruxelles, Charlotte Duché, Sonia Fraisse, Cyril Goizet, Laetitia Jameau, Danielle Lafoucrière, Umberto Spampinato REGISTRY contributors 2014-2017 Page 3 of 11 Oberer Eselsberg 45/1 · 89081 Ulm · Germany Phone +49 (0)731 500-63101 · Fax +49 (0)731 500-63082 · www.euro-hd.net Clermont-Ferrand (Hôpital Gabriel Montpied): Julien Couttier, Bérengère Debilly, Christine Delaigue, Philippe Derost, Franck Durif, Véronique Germain, Perrine Legendre, Sylvie Loiseau, Ana Marques, Miguel Ulla, Tiphaine Vidal Creteil (Hôpital Henri Mondor): Anne-Catherine Bachoud-Lévi, Farideh Badei, Marie-Françoise Boissé, Lotfi Boudali, Laurent Cleret de Langavant, Laurie Lemoine, Graca Morgado, Katia Youssov Lille-Amiens: Lille (CHRU Roger Salengro): Agnès Annic, Recka Barthélémy, Christelle De Bruycker, Maryline Cabaret, Anne-Sophie Carette, Nicolas Carrière, Eric Decorte, Luc Defebvre, Marie Delliaux, Arnaud Delval, Alizé Depelchin, Alain Destee, Nelly Dewulf-Pasz, Thibaut Dondaine, Florence Dugauquier, Kathy Dujardin, Lucie Hopes, Pierre Krystkowiak, Marie-Hélène Lemaire, Sylvie Manouvrier, Eugénie Mutez, Mireille Peter, Lucie Plomhouse, Bernard Sablonnière, Clémence Simonin, Céline Tard, Stéphanie Thibault-Tanchou, Isabelle Vuillaume Amiens (CHU Sud): Marcellin Bellonet, Stéphanie Blin, Simone Chen, Pierre Krystkowiak, Kamel Masmoudi, Gilles Morin, Martine Roussel, Mélissa Tir, Béatrice Schüler, Sandrine Wannepain, Yassine Zouitina Marseille (Hôpital La Timone): Jean-Philippe Azulay, Marie Delfini, Alexandre Eusebio, Frédérique Fluchere, Aicha Guenam, Laura Mundler, Karine Nguyen Paris (Hôpital de la Pitié Salpêtrière): Sandra Benaich, Alexis Brice, Sarah Boster, Perrine Charles, Alexandra Durr, Claire Ewencyk, Hélène Francisque, Céline Jauffret, Damian Justo, Abdulrahman Kassar, Stephan Klebe, Fabien Lesne, Paolo Milani, Marie-Lorraine Monin, Tiffany Monnier, Emmanuel Roze, Alina Tataru, Maya Tchikviladzé Rouen (Hôpital Charles Nicolle): Sandrine Bioux, Evangeline Bliaux, Carole Girard, Lucie Guyant-Maréchal, Didier Hannequin, Véronique Hannier, Séverine Jourdain, David Maltête, Dorothée Pouliquen Strasbourg (Hôpital Civil): Mathieu Anheim, Nadia Barun, Ouhaïd Lagha-Boukbiza, Nadine Longato, Christophe Marcel, Clélie Phillipps, Gabrielle Rudolf, Gisèle Steinmetz, Christine Tranchant, Caroline Wagner, Marie-Agathe Zimmermann Toulouse (Hôpital Purpan): Leily Blondeau, Fabienne Calvas, Samia Cheriet, Hélène Delabaere, Jean-François Demonet, Laurent Marquine, Jérémie Pariente, Michèle Pierre, Elsa Pomies, Sandrine Rolland, Corinne Souyris GERMANY Aachen (Universitätsklinikum Aachen, Neurologische Klinik): Christoph Michael Kosinski, Eva Milkereit, Daniela Probst, Kathrin Reetz, Christian Sass, Johannes Schiefer, Christiane Schlangen, Cornelius J. Werner Berlin (Universitätsmedizin

Berlin, Klinik und Poliklinik für Neurologie): Markus Beuth, Harald Gelderblom, Josef Priller, Harald Prüß, Eike Spruth, Silvia Thiel Bochum (Huntington-Zentrum (NRW) Bochum im St. Josef-Hospital): Jürgen Andrich, Gisa Ellrichmann, Lennard Herrmann, Rainer Hoffmann, Barbara Kaminski, Peter Kraus, Carsten Saft, Christiane Stamm Bremen: Christos Ganos, Lars Stubbe, Vera Tadic, Jennifer Tübing Dinslaken (Reha Zentrum in Dinslaken im Gesundheitszentrums Lang): Herwig Lange Dresden (Universitätsklinikum Carl Gustav Carus an der Technischen Universität Dresden, Klinik und Poliklinik für Neurologie): Cecile Bosredon, Ulrike Hunger, Matthias REGISTRY contributors 2014-2017 Page 4 of 11 Oberer Eselsberg 45/1 · 89081 Ulm · Germany Phone +49 (0)731 500-63101 · Fax +49 (0)731 500-63082 · www.euro-hd.net Löhle, Antonia Maass, Christiana Ossig, Simone Schmidt, Alexander Storch, Annett Wolz, Martin Wolz Erlangen (Universitätsklinikum Erlangen, Molekulare Neurologie und Klinik für Neurologie): Zacharias Kohl, Christina Kozay, Jasmin Ullah, Jürgen Winkler Freiburg (Universitätsklinik Freiburg, Neurologie): Ulrike Bergmann, Regina Böringer, Philipp Capetian, Gerit Kammel, Johann Lambeck, Miriam Mächtel, Simone Meier, Michel Rijntjes, Birgit Zucker Hamburg (Universitätsklinikum Hamburg-Eppendorf, Klinik und Poliklinik für Neurologie): Kai Boelmans, Christos Ganos, Ines Goerendt, Walburgis Heinicke, Ute Hidding, Jan Lewerenz, Alexander Münchau, Michael Orth, Jenny Schmalfeld, Lars Stubbe, Simone Zittel Hannover (Neurologische Klinik mit Klinischer Neurophysiologie, Medizinische Hochschule Hannover): Gabriele Diercks, Dirk Dressler, Flverly Francis, Sabine GaydeStephan, Heike Gorzolla, Bianca Kramer, Rebecca Minschke, Christoph Schrader, Pawel Tacik Itzehoe (Schwerpunktpraxis Huntington, Neurologie und Psychiatrie): Michael Ribbat+ Marburg KPP (Klinik für Psychiatrie und Psychotherapie Marburg-Süd): Bernhard Longinus Marburg UNI (Universitätsklinik Marburg, Sprechstunde für choreatiforme Bewegungsstörungen): Carsten Möller, Katrin Bürk München (Huntington-Ambulanz im Neuro-Kopfzentrum - Klinikum rechts der Isar der Neurologischen Klinik und Poliklinik der Technischen Universität München): Antje Lüsebrink, Mark Mühlau, Alexander Peinemann, Michael Städtler, Adolf Weindl, Juliane Winkelmann, Cornelia Ziegler Münster (Universitätsklinikum Münster, Klinik und Poliklinik für Neurologie): Natalie Bechtel, Heike Beckmann, Stefan Bohlen, Nicole Göpfert, Eva Hölzner, Herwig Lange, Ralf Reilmann, Stefanie Rohm, Silke Rumpf, Christian Sass, Sigrun Schepers, Nathalia Weber Taufkirchen (Isar-Amper-Klinikum - Klinik Taufkirchen (Vils)): Michael Bachmeier, Matthias Dose, Nina Hofstetter, Ralf Marquard, Alzbeta Mühlbäck Ulm (Universitätsklinikum Ulm, Neurologie): Katrin Barth, Andrea Buck, Julia Connemann, Daniel Ecker, Carolin Geitner, Christine Held, Andrea Kesse, Bernhard Landwehrmeyer, Franziska Lezius, Jan Lewerenz, Solveig Nepper, Anke Niess, Michael Orth, Ariane Schneider, Daniela Schwenk, Sigurd Süsmuth, Sonja Trautmann, Melanie Vogel, Patrick Weydt Würzburg (Universitätsklinikum Würzburg, Neurologie): Stephan Klebe, Thomas Musacchio, Christine Leypold, Kerstin Nöth ITALY Bari (Neurophysiopathology of Pain Unit, Basic Medical, Neuroscience and Sensory System Department, University of Bari): Claudia Cormio, Olimpia Difruscolo, Giovanni Franco, Angela Nuzzi, Vittorio Scirucchio, Claudia Serpino, Marina de Tommaso Bologna (DIBINEM - Alma Mater Studiorum - Università di Bologna, IRCCS Istituto delle Scienze Neurologiche di Bologna): Giovanna Calandra-Buonaura, Sabina Capellari, Pietro Cortelli, Roberto Gallassi, Roberto Poda, Cesa Scaglione Brescia (Division of Biology and Genetics, Department of Molecular and Translational Medicine & Division of Neurology, Department of Clinical and Experimental Sciences, REGISTRY contributors 2014-2017 Page 5 of 11 Oberer Eselsberg 45/1 · 89081 Ulm · Germany Phone +49 (0)731 500-63101 · Fax +49 (0)731 500-63082 · www.euro-hd.net University of Brescia): Chiara Agosti, Sergio Barlati, Silvia Compostella, Eleonora Marchina, Alessando Padovani Cagliari (Movement Disorders Center,



Department of Neurology, Institute of Neurology, University of Cagliari): Michela Figorilli, Francesco Marrosu, Antonella Muroli, Valeria Piras, Melisa Vacca Florence (Department of NEUROFARBA, University of Florence & Careggi University Hospital, IRCSS " Don Gnocchi "): Elisabetta Bertini, Caterina Bartoli, Fernanda Fortunato, Elena Ghelli, Andrea Ginestroni, Claudia Mechi, Marco Paganini, Silvia Piacentini, Silvia Pradella, Anna Maria Romoli, Sandro Sorbi Genoa (Department of Neuroscience, Rehabilitation, Ophthalmology, Genetics, Maternal and Child Health, University of Genova): Giovanni Abbruzzese, Monica Bandettini di Poggio, Giovanna Ferrandes, Paola Mandich, Roberta Marchese, Emilio Di Maria, Tiziano Tamburini Milan (SODS Genetica delle Malattie Neurodegenerative e Metaboliche & U.O. Neurologia, Fondazione IRCCS Istituto Neurologico Carlo Besta): Alberto Albanese, Simona Castagliuolo, Anna Castaldo, Stefano Di Donato, Daniela Di Bella, Cinzia Gellera, Silvia Genitrini, Caterina Mariotti, Daniela Monza, Lorenzo Nanetti, Marta Panzeri, Dominga Paridi, Paola Soliveri, Francesca Spagnolo, Franco Taroni, Chiara Tomasello Naples (Department of Neurosciences and Reproductive and Odontostomatological Sciences, Federico II University of Naples): Giuseppe De Michele, Luigi Di Maio, Carlo Rinaldi, Marco Massarelli, Silvio Peluso, Alessandro Roca, Cinzia Valeria Russo, Elena Salvatore, Pierpaolo Sorrentino, Tecla Tucci Pozzilli (IS) (IRCCS Neuromed): Milena Cannella, Valentina Codella, Francesca De Gregorio, Annunziata De Nicola, Francesca Elifani, Chiara Esposito, Tiziana Martino, Irene Mazzante, Martina Petrollini, Maria Simonelli, Maurizio Vezza IRCCS Casa Sollievo della Sofferenza, San Giovanni Rotondo: Ferdinando Squitieri Rome (LIRH Foundation): Barbara D'Alessio, Francesca Lovo Rome (Department of Neurology, Università Cattolica del Sacro Cuore; Institute of Translational Pharmacology & Institute of Cognitive Sciences and Technologies, National Research Council of Italy): Anna Rita Bentivoglio, Francesco Bove, Claudio Catalli, Raffaella Di Giacomo, Alfonso Fasano, Marina Frontali, Arianna Guidubaldi, Tamara Ialongo, Gioia Jacopini, Giovanna Loria, Anna Modoni, Martina Petracca, Carla Piano, Piccininni Chiara, Davide Quaranta, Silvia Romano, Francesco Soleti, Marcella Solito, Maria Spadaro, Flavia Torlizzi, Paola Zinzi Rome (Azienda Ospedaliera Sant'Andrea; Department of Neuroscience, Mental Health and Sensory Organs (NESMOS), Faculty of Medicine and Psychology, Sapienza University of Rome; Institute of Translational Pharmacology & Institute of Cognitive Sciences and Technologies, National Research Council of Italy): Giulia Coarelli, Michela Ferraldeschi, Marina Frontali, Gioia Jacopini, Giovanni Ristori, Silvia Romano, Paola Zinzi NETHERLANDS Enschede (Medisch Spectrum Twente): Monique S.E. van Hout, Jeroen P.P. van Vugt, A. Marit de Weert, Marloes Verhoeven Groningen (Polikliniek Neurologie): Meike Dekker, Jesper Klooster, Nico Leenders, Joost van Oostrom, Berry Kremer REGISTRY contributors 2014-2017 Page 6 of 11 Oberer Eselsberg 45/1 · 89081 Ulm · Germany Phone +49 (0)731 500-63101 · Fax +49 (0)731 500-63082 · www.euro-hd.net Leiden (Leiden University Medical Centre (LUMC)): Verena Baake, Simon J. A. van den Bogaard, Reineke Bos, Eve M. Dumas, Ellen P. 't Hart, Marye Hogenboom, Milou Jacobs, Caroline Jurgens, Anne Kampstra, Raymund A.C. Roos, Anne Schoonderbeek, Marie-Noëlle Witjes-Ané Maastricht: Annelien Duits, Mayke Oosterloo, Mirella Waber Nijmegen (Universitair Medisch Centrum St. Radboud, Neurology): Berry Kremer, Carla Verstappen NORWAY Bergen (Haukeland University Hospital, Dept of Medical Genetics and Olaviken Psychiatric Hospital): Ellen Økland Blinkenberg. (NKS Olaviken`s HD clinic): Erik Hauge, Hilde Tyvoll Oslo University Hospital (Dept. of Medical Genetics, Dept. of Neurology, Dept.of Neurorehabilitation): Olaf Aaserud, Nils Olaf Aanonsen, Kathrine Bjørge, Nancy Borgerød, Elisabeth Dramstad, Madeleine Fannemel, Jan C. Frich, Per F. Gørvell, Kathrine Haggag, Cecilie Haggag Johannessen, Arvid Heiberg, Lars Retterstøl, Oddveig Røsby, Jutta Rummel, Alma Sikiric, Bodil

Stokke, Marleen van Walsem, Ragnhild Wehus Trondheim (St. Olavs Hospital): Vibeke Arntsen, Inga Bjørnevoll, Sigrid Botne Sando, Marte Gjøøl Haug, Hanna Haugan Størseth, Rune Østern, Julie Paulsen

POLAND Gdansk (St. Adalbert Hospital, Gdansk, Medical University of Gdansk, Neurological and Psychiatric Nursing Dpt.): Artur Dziadkiewicz, Agnieszka Konkel, Ewa Narożańska, Malgorzata Nowak, Piotr Robowski, Emilia Sitek, Jaroslaw Slawek, Witold Soltan, Michal Szinwelski Katowice (Medical University of Silesia, Katowice): Michał Arkuszewski, Magdalena Błaszczyk, Magdalena Boczarska-Jedynak, Ewelina Ciach-Wysocka, Agnieszka Gorzkowska, Barbara Jasińska-Myga, Aleksandra Kaczmarczyk, Gabriela Kłodowska – Duda, Grzegorz Opala, Monika Rudzińska, Daniel Stompel Krakow (Krakowska Akademia Neurologii): Krzysztof Banaszekiewicz, Dorota Boćwińska, Kamila Bojakowska-Jaremek, Małgorzata Dec, Natalia Grabska, Malgorzata Krawczyk, Ewelina Kubowicz, Michalina Malec-Litwinowicz, Monika Rudzińska, Agata Stenwak, Andrzej Szczudlik, Elżbieta Szczygieł, Magdalena Wójcik, Anna Wasielewska Poznan (Poznan University of Medical Sciences, Poland): Jacek Anioła Anna Bryl, Anna Ciesielska, Aneta Klimberg, Jerzy Marcinkowski, Husam Samara, Justyna Sempołowicz, Bartłomiej Wiśniewski, Daniel Zielonka Warsaw-MU (Medical University of Warsaw, Neurology): Anna Gogol (formerly Kalbarczyk), Piotr Janik, Zygmunt Jamrozik, Anna Kaminska, Hubert Kwiecinski+ Warsaw-IPiN (Institute of Psychiatry and Neurology Dep. of Genetics, First Dep. of Neurology): Jakub Antczak, Katarzyna Jachinska, Wioletta Krysa, Maryla Rakowicz, Rafal Rola, Danuta Ryglewicz, Halina Sienkiewicz-Jarosz, Iwona Stępnia, Anna Sułek, Grzegorz Witkowski, Jacek Zaremba, Elzbieta Zdzienicka, Karolina Ziara-Jakutowicz

PORTUGAL Coimbra – (Hospital Universitário de Coimbra): Cristina Januário, Filipa Júlio

REGISTRY contributors 2014-2017 Page 7 of 11 Oberer Eselsberg 45/1 · 89081 Ulm · Germany Phone +49 (0)731 500-63101 · Fax +49 (0)731 500-63082 · www.euro-hd.net

Lisbon-Central (Hospital dos Capuchos, Centro Hospitalar Lisboa Central): Manuel Almeida, Ana Calado, Margarida Dias, Joana Morgado, Cristina Semedo Lisbon-HSM (Hospital de Santa Maria, Clinical Pharmacology Unit, Instituto de Medicina Molecular): Leonor Correia Guedes, Miguel Coelho, Joaquim J Ferreira, Andreia Magalhães, Tiago Mestre, Tiago Mendes, Dulce Neutel, Filipe Rodrigues, Anabela Valadas

Lisbon-HFF (Hospital Fernando da Fonseca): Cristina Costa, Helena Cardoso, Tiago Mendes, Mariana Santos

Porto-HGSA (Hospital Santo António- Centro Hospitalar do Porto): Gonçalo Cação, Sara Cavaco, Joana Damásio, Joana Fernandes, Alexandra Gonçalves, Rui Loureiro, Inês Moreira, Marina Magalhães, Paula Salgado

Porto- HSJ (Hospital de São João): Carlos Andrade, Andreia Costa, Carolina Garrett, Miguel Gago, Joana Guimarães, João Massano, Joana Meireles, Ana Monteiro

RUSSIAN FEDERATION Kazan: Diana Khasanova, Zuleykha Zalyalova Moscow – (Research Center of Neurology): Sergey Illarioshkin, Sergey Klyushnikov, Olga Sidorova, Oleg Smirnov, Elizaveta Yudina, Yury Seliverstov

Nizhny Novgorod – (Nizhny Novgorod Medical Academy, Neurology Department): Victoria Antonova, Svetlana Kopishinskaya, Maria Korotysh

Ufa – (Bashkir State Medical University, Department of Neurology, Neurosurgery, and Medical Genetics): Rim Magzhanov, Elena Saifullina

Voronezh: Sergey Kurbatov

SPAIN Alicante-Alcoy (Hospital Virgen de los Lirios): Pilar Solis Badajoz (Hospital Infanta Cristina): Carmen Durán Herrera, Patrocinio Garcia Moreno

Barcelona-Bellvitge (Hospital Universitari de Bellvitge): Jordi Bas, Núria Busquets, Matilde Calopa, Serge Jaumà Classen, Nadia Rodríguez Dedichá

Barcelona- Clínic i Provincial (Hospital Clínic i Provincial): María Teresa Buongiorno, Andrés de la Cerda Santa María, Esteban Muñoz, Pilar Santacruz

Barcelona-Hospital Mútua de Terrassa: Miquel Aguilar Barbera, Ana Rojo Sebastián, Sonia Arribas Pardo, Dolors Badenes Guia, Noemi Calzado, Laura Casas Hernanz, Juan Pablo Tartari

Díaz-Zorita, Judit López Catena, Pilar Quiléz Ferrer, Gemma Tome Carruesco

Barcelona-Merced (Hospital Mare de Deu de La Merced):

Misericordia Floriach Robert, Cèlia Mareca Viladrich, Elvira Roca, Jesús Miguel Ruiz Idiago, Antonio Villa Riballo Barcelona-Santa Cruz y San Pablo (Hospital de la Santa Creu i Sant Pau): Antonia Campolongo, Ramon Fernandez de Bobadilla, Andrea Horta, Jaime Kulisevsky Bojarsky, Saul Martinez-Horta, Javier Pagonabarraga, Jesus Perez Perez, Roser Ribosa, Carolina Villa Bilbao (Hospital de Cruces): Maria Angeles Acera Gil, Koldo Berganzo Corrales, Juan Carlos Gomez Esteban, Amaia González, Beatriz Tijero Merino Burgos (Servicio de Neurología Hospital General Yagüe): Esther Cubo, Cecilia Gil Polo, Natividad Mariscal, Jesús Sánchez REGISTRY contributors 2014-2017 Page 8 of 11 Oberer Eselsberg 45/1 · 89081 Ulm · Germany Phone +49 (0)731 500-63101 · Fax +49 (0)731 500-63082 · www.euro-hd.net Canarias (Hospital Insular de Gran Canaria): Sandra Gutierrez Romero, José Matías Arbelo, Rocío Malo de Molina, Ildaira Martín, Juan Manuel Periañez, Beatriz Udaeta Fuenlabrada (Hospital Universitario): Fernando Alonso-Frech, María del Valle Loarte Granada (Hospital Universitario San Cecilio, Neurología): Francisco Barrero, Blas Morales Madrid-BTCIEN (Fundación CIEN): Belén Frades, Marina Ávila Villanueva, Maria Ascension Zea Sevilla Madrid-Clínico (Hospital Clínico Universitario San Carlos): María del Mar Fenollar, Rocío García-Ramos García, Clara Villanueva Madrid RYC (Hospital Ramón y Cajal, Neurología): Mónica Bascuñana, Marta Fatás Ventura, Juan García Caldentey, Guillermo García Ribas, Justo García de Yébenes, José Luis López-Sendón Moreno, Verónica Mañanes Barral, Patricia Trigo Cubillo Madrid FJD (Madrid-Fundación Jiménez Díaz): Cici Feliz, Pedro José García Ruíz, Ana García, Juan García Caldentey, Rosa Guerrero López, Antonio Herranz Bárcenas, Asunción Martínez-Descals, Angel Martínez Pueyo, Veronica Puertas Martin, Noelia Rodríguez Martínez, Teresa Montojo, María José Sainz Artiga, Vicenta Sánchez Murcia (Hospital Universitario Virgen de la Arrixaca): María Dolores Alarcón, Carmen Antúnez Almagro, Esther Diéguez, Lorenza Fortuna, Agustina Legaz, Salvadora Manzanares, Juan Marín Muñoz, María Martirio Antequera Torres, Fuensanta Noguera Perea, Laura Vivancos Oviedo (Hospital Central de Asturias): Sonia González, Luis Menéndez Guisasola, Marta Para Prieto, René Ribacoba, Carlos Salvador, Pablo Sánchez Lozano Palma de Mallorca (Hospital Universitario Son Espases): Juan García Caldentey, Inés Legarda Ramirez, Dolors Moragues Benito, Penelope Navas Arques, Monica Rodriguez Lopera, Barbara Vives Pastor Pamplona (Complejo Hospitalario de Navarra): Itziar Gaston, Fermin Garcia-Amigot, Maria Dolores Martinez-Jaurrieta, Maria Antonia Ramos-Arroyo Sevilla (Hospital Universitario Virgen del Rocío): Astrid Adarmes, Maravilla BernalEscudero, Fátima Carrillo, Silvia Jesús, Pablo Mir, Laura Vargas-González Sevilla (Hospital Virgen Macarena): Fátima Damas Hermoso, José Manuel García Moreno, Javier Abril Jaramillo, Carolina Mendez Lucena, Eva María Pacheco Cortegana, José Chacón Peña, Luis Redondo, Violeta Sánchez Sánchez Sevilla (Residencia Santa Ana): Cristina Melgar Fernandez, María Dolores Romero Lemos, Maite Paredes Mata, Rocío Villagrán Casado Valencia (Hospital la Fe): Maria Bosca, Juan Andres Burguera, Francisco Castera Brugada, Jose Maria Millán Salvador, Carmen Peiró Vilaplana, Pilar Solís, Begoña Jeweinat Figuerola, Paloma Millan Palanca Zaragoza (Hospital Clínico): Elena Bellosta Diago, Javier López del Val, Laura Martinez Martinez, Elena López SWEDEN Göteborg (Sahlgrenska University Hospital): Jan Wahlström+, Ulrika Høsterey-Ugander, Gunnel Fredlund, Radu Constantinescu, Kajsa Lewin, Liselotte Neleborn-Lingefjärd, Maria Berglund, Peter Berglund, Petra Linnsand REGISTRY contributors 2014-2017 Page 9 of 11 Oberer Eselsberg 45/1 · 89081 Ulm · Germany Phone +49 (0)731 500-63101 · Fax +49 (0)731 500-63082 · www.euro-hd.net Lund (Dept Neurology, Skånes Universityhospital): Åsa Petersén, Jan Reimer, Håkan Widner Stockholm-Ersta: Mouna Esmaeilzadeh, Joakim Tedroff, Elisabeth Winnberg Stockholm Karolinska University Hospital: Stanislav Benaminov, Elisabeth Björnsson, Daniel Merrick, Martin Paucar, Sven Pålhagen, Per

Svenningsson, Tina Wallden Umeå (Umeå University Hospital): Måns Berglund, Ghada Loutfi, Carina Olofsson, EvaLena Stattin, Laila Westman, Birgitta Wikström Uppsala University Hospital: Camilla Ekwall, Marie-Lousie Göller, Anders Johansson, Valter Niemelä, Dag Nyholm, Jimmy Sundblom, Leif Wiklund SWITZERLAND Bern: Jean-Marc Burgunder, Jessica Koehli, Yanik Stebler (Swiss HD Zentrum), Alain Kaelin, Irene Romero, Michael Schüpbach, Sabine Weber Zaugg (Zentrum für Bewegungsstörungen, Neurologische Klinik und Poliklinik, Universität Bern) Lausanne: Federica Esposito, Jean-Marc Good, Karin Paus, Francois Vingerhoets, Christian Wider+ Zürich (University Hospital and University of Zurich): Hans H. Jung, Jens A. Petersen, Maria Ligon-Auer, Violeta Mihaylova U.K. Aberdeen (NHS Grampian Clinical Genetics Centre & University of Aberdeen): Lorna Downie, Roisin Jack, Kirsty Matheson, Zosia Miedzybrodzka, Daniela Rae, Sheila A Simpson, Fiona Summers, Alexandra Ure, Vivien Vaughan Barnstaple: Timothy Harrower, Nathan Vernon Birmingham (The Barberry Centre, Dept of Psychiatry): Shahbana Akhtar, Jenny Crooks, Adrienne Curtis, Jenny de Souza (Keylock), John Piedad, Hugh Rickards, Jan Wright Blanford Forum: Diane Haig-Brown, Janet Craven, Andrew Pallett, Steve Simpson, Rebecca Weekes Bristol (North Bristol NHs Trust, Southmead hospital): Elizabeth Coulthard, Louise Gethin, Beverley Hayward, Kasia Sieradzan, Abigail Wright Cambridge (Cambridge Centre for Brain Repair, Forvie Site): Roger A. Barker, Deidre O'Keefe, Anna Gertiz (nee Di Pietro), Kate Fisher, Anna Goodman, Susan Hill, Sarah Mason, Rachel Swain, Natalie Valle Guzman Cardiff (Schools of Medicine and Biosciences, Cardiff University): Jonathan Bisson, Monica Busse, Cynthia Butcher, Rebecca Cousins, Jenny Callaghan, Stephen Dunnett, Catherine Clenaghan, Ruth Fullam, Sarah Hunt, Lesley Jones, Una Jones, Hanan Khalil, Sara Minster, Michael Owen, Kathleen Price, Jenny Townhill, Anne Rosser Dundee (Scottish Huntington's Association, Ninewells Hospital): David Goudie, Lindsay Buchanan, Paula McFadyen, Alison Tonner, Anne-Marie Taylor Edinburgh (SE Scotland Genetic Service, Western General Hospital): Maureen Edwards, Carrie Ho (Scottish Huntington's Association), Marie McGill, Mary Porteous, Pauline Pearson REGISTRY contributors 2014-2017 Page 10 of 11 Oberer Eselsberg 45/1 · 89081 Ulm · Germany Phone +49 (0)731 500-63101 · Fax +49 (0)731 500-63082 · www.euro-hd.net Exeter (Department of Neurology Royal Devon and Exeter Foundation Trust Hospital): Timothy Harrower, Sarah Irvine Fife (Scottish Huntington's Association Whyteman's Brae Hospital): Peter Brockie, Jillian Foster, Nicola Johns, Sue McKenzie, Jean Rothery, Gareth Thomas, Shona Yates Forth\_Valley (Neurology Department, Forth Valley Royal Hospital): Christian Neumann, Kirsten Patterson, David Thomson Glasgow (Glasgow HD Management Clinic, Southern General Hospital): Catherine Deith, Jane Ireland, Stuart Ritchie Gloucester (Department of Neurology Gloucestershire Royal Hospital): Pauline Brown, Liz Burrows, Amy Fletcher, Alison Harding, Kaye Harrison, Fiona Laver, Mark Silva, Aileen Thomson Hull (Castle Hill Hospital): Carol Chu, Carole Evans, Deena Gallentree, Stephanie Hamer, Alison Kraus, Ivana Markova, Ashok Raman, Liz Rowett Launceston (Millaton Court): Alyson Andrew, Julie Frost, Rupert Noad Leeds (Chapel Allerton Hospital, Department of Clinical Genetics): Jeremy Cosgrove, Deena Gallantree, Stephanie Hamer, Emma Hobson, Stuart Jamieson, Alison Kraus, Mandy Longthorpe, Ivana Markova, Hannah Musgrave, Caroline Peacy, Ashok Raman, Liz Rowett, Jean Toscano, Sue Wild, Pam Yardumian Leicester (Leicestershire Partnership Trust, Mill Lodge): Carole Clayton, Heather Dipple, Dawn Freire-Patino, Caroline Hallam, Julia Middleton Liverpool (Walton Centre for Neurology and Neurosurgery): Sundus Alusi, Rhys Davies, Kevin Foy, Emily Gerrans, Louise Pate London (St. Georges-Hospital): Uruj Anjum, Jan Coebergh, Charlotte Eddy, Nayana Lahiri, Meriel McEntagart, Michael Patton, Maria Peterson, Sarah Rose London (Guy's Hospital): Thomasin Andrews, Andrew Dougherty, Charlotte Golding, Fred Kavalier, Hana Laing,

Alison Lashwood, Dene Robertson, Deborah Ruddy, Alastair Santhouse, Anna Whaite London (The National Hospital for Neurology and Neurosurgery): Thomasin Andrews, Stefanie Gosling (nee Brown), Stefania Bruno, Elvina Chu, Karen Doherty, Charlotte Golding, Salman Haider, Davina Hensman, Nayana Lahiri, Monica Lewis, Marianne Novak, Aakta Patel, Nicola Robertson, Elisabeth Rosser, Sarah Tabrizi, Rachel Taylor, Thomas Warner, Edward Wild London (Royal Hospital for Neuro-disability): Oda Ackermann, Sophie Dupont, Adrienne Scott, Nicholas Stoy, Jenny Vaughn Manchester (Genetic Medicine, University of Manchester, Manchester Academic Health Sciences Centre and Central Manchester University Hospitals NHS Foundation Trust): Natalie Arran, Judith Bek, Jenny Callaghan, David Craufurd, Ruth Fullam, Marianne Hare, Liz Howard, Susan Huson, Liz Johnson, Mary Jones, Ashok Krishnamoorthy, Helen Murphy, Emma Oughton, Lucy Partington-Jones, Dawn Rogers, Andrea Sollom, Julie Snowden, Cheryl Stopford, Jennifer Thompson, Iris Trender-Gerhard, Nichola Verstraelen (formerly Ritchie), Leann Westmoreland Newcastle-upon-Tyne (Centre for Life, Institute of Medical Genetics): Ginette Cass, Lynn Davidson, Jill Davison, Neil Fullerton, Katrina Holmes, Suresh Komati, Sharon McDonnell, Zeid Mohammed, Karen Morgan, Lois Savage, Baldev Singh, Josh Wood Northampton (St Andrew's Healthcare): Elvina Chu, Caroline Knight, Mari O'Neill, Debasish Das Purkayastha REGISTRY contributors 2014-2017 Page 11 of 11 Oberer Eselsberg 45/1 · 89081 Ulm · Germany Phone +49 (0)731 500-63101 · Fax +49 (0)731 500-63082 · www.euro-hd.net Oxford (Oxford University Hospitals NHS Trust, Dept. of Neurosciences, University of Oxford): Andrea H Nemeth, Gill Siuda, Ruth Valentine, Kathryn Dixon, Richard Armstrong Plymouth (Plymouth Huntington Disease Service, Mount Gould Hospital): David Harrison, Max Hughes, Sandra Large, John O Donovan, Amy Palmer, Andrew Parkinson, Beverley Soltysiak, Leanne Timings, Josh Williams Poole (Brain Injury Service, Poole Hospital): John Burn, Rebecca Weekes, Janet Craven, Wendy Bailey, Caroline Coleman, Diane Haig-Brown, Steve Simpson Preston (Neurology Department, Preston Royal Hospital): Marianne Hare, Tahir Majeed, Nicola Verstraelen (Ritchie) Reading (Royal Berkshire Hospital): Richard Armstrong, Kathryn Dixon, Wendy Barrett, Aileen Ho Sheffield (The Royal Hallamshire Hospital– Sheffield Children's Hospital): Oliver Bandmann, Alyson Bradbury, Helen Fairtlough, Kay Fillingham, Isabella Foustanos, Paul Gill, Mbombe Kazoka, Kirsty O'Donovan, Louise Nevitt, Nadia Peppia, Oliver Quarrell, Cat Taylor, Katherine Tidswell Southampton (Southampton General Hospital): Christopher Kipps, Lesley MacKinnon, Veena Agarwal, Elaine Hayward, Kerry Gunner, Kayla Harris, Mary Anderson, Melanie Heywood, Liane Keys, Sarah Smalley Stoke on Trent (Bucknall Hospital): George El-Nimr, Allison Duffell, Sue Wood, Karen Kennedy (nee Smith) Swindon (Victoria Centre, Great Western Hospital): Lesley Gowers, Kingsley Powell, Pamela Bethwaite, Rachel Edwards, Kathleen Fuller, Michelle Phillips EHDN's associate site in Singapore: National Neuroscience Institute Singapore: Louis Tan, Jean-Marc Burgunder, Puay Ngoh Lau, Emmanuel Pica
