# Supplementary material
Source: PubMed Central journal article supplement (PMC8764269)
Supplement: mmc2.pdf [file mmc2.pdf]

# Longer CAG repeat length is associated with shorter survival after disease onset in Huntington disease

Douglas R. Langbehn<sup>1,\*</sup> for the Registry Investigators of the European Huntington Disease Network

## Summary

It is well known that the length of the CAG trinucleotide expansion of the huntingtin gene is associated with many aspects of Huntington disease progression. These include age of clinical onset and rate of initial progression of disease severity. The relationship between CAG length and survival in Huntington disease is less studied. To address this, we obtained the complete Registry HD database from the European Huntington Disease Network and reanalyzed the time from reported age of disease onset until death. We conducted semiparametric proportional hazards modeling of 8,422 participants who had experienced onset of clinical Huntington disease, either retrospectively or prospectively. Of these, 826 had a recorded age of death. To avoid biased model estimates, retrospective onset ages were represented by left truncation at study entry. After controlling for onset age, which tends to be younger in those with longer CAG repeat lengths, we found that CAG length had a substantial and highly significant influence upon survival time after disease onset. For a fixed age of onset, longer CAG expansions were predictive of shorter survival. This is consistent with other known relationships between CAG length and disease severity. We also show that older onset age predicts shorter lifespan after controlling for CAG length and that the influence of CAG on survival length is substantially greater in women. We demonstrate that apparent contradictions between these and previous analyses of the same data are primarily due to the question of whether to control for clinical onset age in the analysis of time until death.

## Introduction

Huntington disease (HD) (MIM: 143100) is an autosomal-dominant nervous system disease caused by abnormally long expansion of CAG trinucleotide repeats within the *huntingtin* (*HTT*) gene (MIM: 613004). The age of onset is well known to be strongly influenced by CAG expansion-length<sup>1</sup> (hereafter referred to as CAG length). Within the typically encountered range of approximately 40 to 50 CAG repeats, onset age ranges from 30 to 65 years<sup>2</sup> for most affected individuals. CAG lengths above this range are often associated with juvenile or young adult onset,<sup>3</sup> whereas partial penetrance and late disease onset occurs for CAG lengths of 36 to 39.<sup>2</sup>

HD manifests by onset of cognitive decline, abnormal involuntary motor movements, and a less predictable range of behavioral-psychiatric problems that include severe apathy, impulsivity, and deterioration of executive function. HD develops insidiously within an affected individual, with brain changes detectable several decades before onset<sup>4–6</sup> (and possibly from birth<sup>7</sup>). Upon careful examination, subtle loss of motor and cognitive function is often detectable a number of years prior to the point of clinically significant disease.<sup>8,9</sup>

Confusingly, several overlapping and imprecise terms are used to discuss the onset of frank clinical illness (e.g., HD onset, motor onset, clinical diagnosis, motor diagnosis with 100% certainty). These differences have often been ignored in the HD literature regarding onset age. The issue

is further confused because, as noted above, the onsets of many aspects of HD are gradual. Thus, there is some subjectivity in determining the degree of severity that constitutes “onset.” Within large clinical HD databases, the most commonly reported of these measures is the age of motor symptom onset as either self-reported or as estimated by a clinician. This is usually a retrospective determination and is frequently listed as between 1 and 3 years prior to “diagnosis” of significantly limiting disease.<sup>10</sup> Although imprecise, because of its widespread reporting, this onset age has been the measure most often used to document the relationship of HD “onset” to CAG repeat length and to secondary genetic factors.

CAG length has been shown to strongly influence not only onset age but also the rate of brain changes and motor and cognitive progression in the years before and shortly after onset.<sup>11–13</sup> However, there is little literature addressing potential relationships between CAG length and the course of late-stage disease and death. Kiebertz and colleagues<sup>14</sup> saw little or no relationship between CAG length and loss of functional capacity in moderately advanced HD. They did not, however, consider interactions of CAG length and patient age. In contrast, in a similarly advanced sample of patients, Rosenblatt and colleagues<sup>4</sup> reported a strong relationship between CAG length and continuing progression when disease duration and onset age were controlled.

We are aware of only one large-scale study examining the relationship between CAG length and death in HD. Keum

<sup>1</sup>Departments of Psychiatry and Biostatistics, The University of Iowa, Iowa City, IA 52242, USA

\*Correspondence: [douglas-langbehn@uiowa.edu](mailto:douglas-langbehn@uiowa.edu)

<https://doi.org/10.1016/j.ajhg.2021.12.002>

© 2021 American Society of Human Genetics.

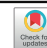

and colleagues<sup>15</sup> have reported that CAG length in HD does not predict the duration of illness from the time of disease onset until death. This finding, which the authors described as “counter-intuitive,” was based on separate statistical analyses of two datasets and did not control for onset age. The first set of data was a mixture from a variety of academic brain and tissue banks. The second was a subset of 1,314 participants from the Registry-HD observational database of the European Huntington Disease Network (EHDN),<sup>16</sup> 115 of whom had a recorded age of death. This represents but a fraction of more than 8,000 relevant participants available within the EHDN Registry study. The criteria for choosing this subset are not explained within the referenced work.

In analyses of early disease progression, the effect of CAG length is primarily manifested by its interaction with age.<sup>9,11,12</sup> It thus seems relevant to ask whether CAG length influences time until death among patients who experienced onset at the same age. This overlooked consideration would potentially align our understanding of the effect of CAG length on post-onset survival with models of CAG length and disease progression. In this report, we reanalyze the length of time from HD onset until death using the complete Registry database. We use statistical modeling techniques that control for the age of onset, as well as for the retrospective reporting of onset ages before entry into the Registry study.

## Subjects and methods

Upon application to the EHDN Executive Committee, we were granted access to pertinent data from the entire Registry database. The data was anonymized, including all information identifying subjects, sites, and countries. This anonymization exempted this project from local Human Subjects approval. The original study was approved by local institutional review boards at each participating site.

Registry was a multi-center, multi-national, prospective, observational study of HD with data collected between June 2004 and June 2017 (see [web resources](#) for [clinicaltrials.gov](#) description). Participants were recruited from HD-affected families who were known to study sites throughout Europe and thus are not a true epidemiological random sample. (To our knowledge, no such samples exist for this rare genetic disorder.) The observations used in the present analyses were collected at 156 different sites within 19 countries. Our analyses are based on 8,422 participants with expanded CAG repeat measurements (>35) with reported age of HD onset either prior to study entry ( $n = 8,205$ ) or during the study ( $n = 217$ ). Within this sample, 826 (9.8%) had an age of death reported. In addition to the 8,422 participants analyzed, the database contained 275 participants with onset age reported later than their age at last Registry visit. These were excluded from analyses, as there is no meaningful post-onset survival to analyze. No deaths were reported among these. We also excluded two participants with HD onset age listed as 0.

The database consists of two subsets, labeled R2 and R3 by the original investigators, with some overlap of participants. R2 data were collected earlier than R3. There were 3,507 participants with data only in R2 and 2,111 participants with data only in R3. The other 2,808 participants had data in both R2 and R3. In the earlier subset R2, the only available HD onset age values

were from the “study rater’s best estimate of onset age.” In the later R3 subset, values were potentially reported for both the “rater’s best estimate of onset age” and the “age of motor onset.” The latter of these may also be the rater’s estimate but is often based on reports from the participant or a secondary informant. (The source of the estimate is not given within the database.) There is no criterion by which to judge whether the “rater’s best estimate” is objectively the better of the two onset measures. Regardless, the estimates are highly correlated. For the 6,582 participants from R3 for whom both rater and motor ages were recorded, the Pearson correlation between the two was 0.949 and the standard deviation of the age differences was 3.976 years. The correlation between R2 rater onset and R3 motor onset ages was 0.962 among 807 overlapping participants with ages recorded in both data subsets. The standard deviation of that difference was 3.302 years.

Our analyses used one observation per person after combining the two subsets. For participants included only in R2, we necessarily used the rater’s best onset estimate. In the R3 data we used the age of motor onset because of its greater inclusiveness. There were 498 participants (5.9%) more with a reported motor age than with a rater age. For 22 deaths (2.7%) in which no rater age of onset was listed, the participants had substantial HD signs and symptoms recorded prospectively within the database. For participants with inconsistent onset age reported in R2 and R3, the earlier of the ages was used. During analyses, we verified that this decision had no notable effect on the key statistical estimates of age and CAG effects within the survival models. (Details are described later in this methods section.)

We performed Cox proportional hazards survival analyses of time from HD symptom onset until death. We checked plausibility of the proportional hazard assumption using Harrell’s “zph” method<sup>17</sup> of collapsing estimators containing a common term and then plotting and testing smoothed, scaled Schoenfeld residuals. As is customary, statistical inference and confidence intervals for proportional hazards were calculated using the log transform.

The predictor variables in the models were CAG repeat length, age of HD symptom onset, and sex. We also examined all potential two-way interactions among these variables. Further, we explored possible nonlinearity of onset age and CAG length using restricted cubic splines with up to four degrees of freedom.<sup>17</sup> Final model selection was based on best AIC value within a predefined ordering of model complexity.

For those with reported onset earlier than their study entry, their data was considered left-truncated<sup>18</sup> at the point of study entry. This means that the portion of their survival period before entry into Registry did not contribute to the statistical evidence used to estimate the survival model. The opportunity to observe such participants is conditional on the fact that they had already survived from the time of HD onset until entering the study. We cannot observe how often a potential participant with similar predictive characteristics would have died before having the chance to enroll. Left truncation avoids the bias that would arise from this discrepancy.

Nearly half of the analyzed sample (49.2%) had age of onset prior to the Registry study and only a single visit within the study. A participant’s age at that visit is statistically informative because it indicates that the participant survived from their onset age up to at least their age at this observation. These participants were credited with a left-truncated interval of 1 day of survival before right censoring. (It can be shown that survival model estimates are insensitive to the precise length of this short observation interval.)

**Table 1. Registry descriptive statistics**

| Measure                                 | Mean  | SD    | 5%ile | 95%ile | Frequency (%)   |
|-----------------------------------------|-------|-------|-------|--------|-----------------|
| HD onset age                            | 44.68 | 12.70 | 23.96 | 65.00  | –               |
| Age of first observation                | 51.40 | 13.17 | 29.55 | 72.80  | –               |
| Time from onset until first observation | 6.76  | 5.48  | 0.76  | 17.14  | –               |
| Age of death or of last observation     | 52.97 | 13.22 | 30.86 | 74.36  | –               |
| Right censoring time after onset        | 8.52  | 5.83  | 1.65  | 19.38  | –               |
| Age at death (n = 826)                  | 58.73 | 13.52 | 37.38 | 80.78  | –               |
| Time from onset until death (n = 826)   | 13.35 | 6.27  | 4.47  | 24.07  | –               |
| CAG expansion length                    | 44.58 | 4.72  | 40.00 | 53.00  | –               |
| Male                                    | –     | –     | –     | –      | 51.2 (n = 4108) |
| Death                                   | –     | –     | –     | –      | 9.8 (n = 826)   |

Abbreviations: %ile, percentile; HD, Huntington disease.

Model robustness was tested in a variety of ways. We refit the model excluding small amounts of data of doubtful validity: (1) onset less than 10 years of age when CAG length was 47 or less (n = 6); (2) study enrollment within 1 month of death (potentially biasing study entry, n = 10); (3) HD onset reported but no UHDRS motor scores of five or greater within the database (n = 105). We also checked model sensitivity by reanalysis after we controlled for data subset R2 versus R3 (earlier versus later data collection), after we used age of rater onset instead of motor onset age within the R3 subset, and after we controlled for minor allele length. Consistent with exclusions in analyses reported by Langbehn and colleagues,<sup>2</sup> we refit the final model excluding 774 individuals with CAG lengths less than 41 (because of suspected enrollment bias with short repeat lengths) and 216 individuals with CAG larger than 56 (due to potentially outsized influence on model estimates of CAG effect). Finally, we examined potential confounding effects of anonymized study site and country by refitting the models with cluster effects for either of these.

To assess the robustness of our analyses to imprecise determinations of onset age, we performed a simulation study in which we perturbed the reported onset ages with normally distributed random variation. The standard deviation was 3 years, which we derived as a plausible value based on discrepancies between the rater onset and motor onset ages within the R3 Registry subset. Discrepancies between the mean simulation results and the original analysis allowed estimation of possible bias due to measurement error in model parameters and their statistical significance. Full details of the simulation methods and results are given in the supplement.

All analyses were performed using base R 3.5.3 or 4.0.2, with the survival 2.43-3, and rms 5.1-3 packages added. Initial data processing and some descriptive statistics were done using SAS 9.4.

## Results

Descriptive statistics are given in [Table 1](#). The mean age at death or last censored observation is only slightly higher than the mean age of the first observation because nearly half of the sample (49.2%) had only one observation in the data. The role of these left-truncated observations, which still contain relevant survival information, is discussed in the [Subjects and methods](#) section above.

Controlling only for sex, we initially tested the otherwise unadjusted influence of CAG repeat length on time from symptom onset until death. The estimated hazard ratio was modest, but statistically significant. The estimated hazard ratio was 1.022, per increase in CAG, p value = 0.0014 (95% confidence interval 1.009 to 1.036) (see [Table 2](#), model 1). Controlling for age of symptom onset ([Table 2](#), model 2), the estimated influence of CAG length increased notably to a hazard ratio of 1.087 (95% confidence interval 1.068 to 1.105, p =  $8 \times 10^{-22}$ ) per increase in CAG.

Results of these initial models ([Table 2](#), models 1 and 2) are very strong evidence against the null hypothesis assertion that CAG length had no influence on the length of time from symptom onset until death in HD. Having rejected this hypothesis, we wanted to describe the nature of these risk relationships in as much detail as the data would allow without over-fitting. We fit models with nonlinear restricted cubic spline terms of up to four degrees of freedom for CAG length and onset age. We also tested potential interactions of these spline transformations of onset age with linear CAG effects and of linear onset-age effects with nonlinear CAG effects. Among this hierarchy of models, AIC was maximized by a three degree-of-freedom spline transformation of the main effect of onset age. The main effect of CAG length and the CAG by onset-age interaction terms involved only linear terms in the final model ([Table 2](#), model 3).

This final model also contained a significant interaction between sex and CAG length (hazard ratio 0.959 for men versus women [95% confidence interval = 0.935 to 0.983], p = 0.00089), with men having a lower decline in survival per CAG length. Potential interactions between CAG length and onset age (either linear or in spline form) were non-significant. Model diagnostics showed that proportional hazard assumptions for the final model were consistent with the data ([Figure S1](#) and [Table S1](#)).

The estimated survival effect of CAG length at different onset ages is illustrated in [Figure 1](#) for women and in [Figure 2](#)

**Table 2. Proportional hazard models for time from HD onset until death**

| Variable                   | log HR  | SE     | z      | p val    | HR    | 95% CI |        |
|----------------------------|---------|--------|--------|----------|-------|--------|--------|
| <b>Model 1</b>             |         |        |        |          |       |        |        |
| CAG (per repeat)           | 0.022   | 0.007  | 3.195  | 1.40E−03 | 1.022 | 1.009  | 1.036  |
| Men versus women           | 0.359   | 0.071  | 5.066  | 4.07E−07 | 1.432 | 1.246  | 1.645  |
| <b>Model 2</b>             |         |        |        |          |       |        |        |
| CAG (per repeat)           | 0.083   | 0.009  | 9.604  | 7.69E−22 | 1.087 | 1.068  | 1.105  |
| Men versus women           | 0.369   | 0.071  | 5.201  | 1.98E−07 | 1.446 | 1.259  | 1.662  |
| Age of HD onset (per year) | 0.036   | 0.004  | 8.980  | 2.71E−19 | 1.036 | 1.028  | 1.044  |
| <b>Model 3</b>             |         |        |        |          |       |        |        |
| CAG (per repeat)           | 0.1227  | 0.0134 | 9.157  | 5.34E−20 | 1.131 | 1.101  | 1.161  |
| Age of HD onset            | 0.0704  | 0.0124 | 5.677  | 1.37E−08 | 1.073 | 1.047  | 1.099  |
| Age of HD onset'           | −0.1191 | 0.0265 | −4.494 | 6.99E−06 | 0.888 | 0.843  | 0.935  |
| Age of HD onset''          | 0.5751  | 0.1113 | 5.167  | 2.38E−07 | 1.777 | 1.429  | 2.211  |
| Men versus women           | 2.2965  | 0.5782 | 3.972  | 7.13E−05 | 9.939 | 3.200  | 30.868 |
| CAG by (M versus W)        | −0.0422 | 0.0127 | −3.323 | 8.91E−04 | 0.959 | 0.935  | 0.983  |

Abbreviations: HR, hazard ratio; SE, standard error; CI, confidence interval; p val, p value; M, men; W, women. For age of HD onset in model 3, restricted cubic spline knots were placed at 23.05, 40.00, 50.00 and 65.00 years of age. Age of HD onset' and age of HD onset'' are the nonlinear restricted cubic spline coefficients for age of HD onset. In model 3, the Wald test for the joint significance of the nonlinear cubic spline terms for age of HD onset = 30.62 (2 df),  $p = 2.24E-7$ . In model 3, the Wald test for the overall significance of the age of HD onset = 129.55 (3 df),  $p < 1E-16$ .

for men. Underlying statistical tables generated from model 3 of Table 2 for these plots, including confidence intervals, are contained within Tables S3–S10. Extrapolated predictions for hypothetical CAG lengths observed in fewer than 1% of cases at these onset ages are shown with dashed lines. Because the CAG hazard ratio does not vary significantly with onset age, all CAG-specific curves in Figure 2 show a similar shape that shifts with onset age. There is, however, clear separation of the CAG-specific survival curves, which is greater for women than for men.

The nonlinear effect of onset age on hazard ratios is difficult to interpret from inspection of either Figure 2 or of the spline coefficients in model 3 of Table 2. Instead, in Figure 3, we illustrate the predicted effect on 15-year survival for the commonly encountered HD CAG length of 43. Note that, because of the lack of interaction between CAG length and onset age, the pattern shown is the same, regardless of CAG length. The notable nonlinear aspect is that variation in symptom onset between approximately 40 and 50 years of age has little effect on survival. However, nearly linear effects are present both below and above this range. The magnitude of the negative slope is notably greater for onset greater than age 50 than for onset less than age 40.

As described in the Subjects and methods, we used a variety of model alterations to test the robustness of our final model (repeated in Table S11 for convenient reference). None of these alterations substantially affected the model parameters of primary interest. We refit the model after deletion of 105 questionable age-of-onset determinations (Table S12). We then refit after restricting the CAG range to 41 to 56 (Table S13). We demonstrate no appreciable effect of minor

allele CAG length (Table S14). We then checked possible effects of cohort and onset definition differences between the earlier R2 versus later R3 Registry subsets. We refit the model controlling for data subset (Table S15) and after using rater-estimated age of onset in place of motor onset for the R3 as well as the data (Table S16). Finally, we re-estimated the model after clustering adjustment for potential country effects (Table S17) or site effects (Table S18). The estimated hazard ratios for both CAG length and CAG length interaction with sex were little changed by any of these model adjustments (Tables S19 and S20).

Our simulations of potential bias due to inaccurate age of onset also showed little effect on the model results (Table S21). Most critically, the simulation suggested that the estimated log hazard ratio coefficient for the CAG-length effect in our final model (model 3 of) had an expected inflation of 6.9% and that the CAG-length interaction with sex had an expected under-estimation of 1.6%. The mean adjusted p value for the main CAG effect was  $9 \times 10^{-16}$  while the mean p value for the interaction with sex was 0.0012.

## Discussion

We have demonstrated that the expansion length of the HTT CAG trinucleotide mutation has a substantial influence on time until death as measured from the onset of HD motor symptoms. The CAG influence is clearly present when age of HD onset is considered as a covariate, and we believe this is the context relevant for most clinical and research questions. However, with a larger sample than

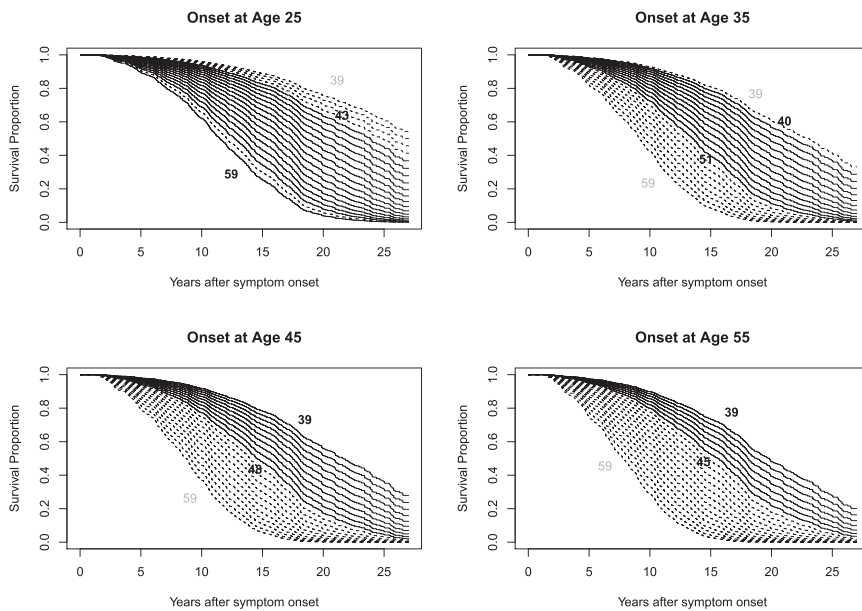

**Figure 1. Estimated CAG-specific survival curves in women for HD onset at ages 25, 35, 45, and 55**

Estimated survival curves for the CAG repeat range 39 to 59 are shown in each plot. Dashed lines represent CAG lengths present in fewer than 1% of observations (sexes combined) in the 5-year period around the stated onset ages (e.g., 42.5 to 47.5 for the onset age 45 plot). The values of the minimum and maximum CAG lengths occurring with at least 1% frequency are printed in black within each plot. Also see [Table S2](#).

Baseline age is often an important predictor in survival analyses of the time from a disease-related event until death. A classic example is the prognostic modeling of the Mayo Clinic primary biliary cirrhosis data,<sup>19</sup> which is often used as a teaching

case for survival analysis methodology.<sup>17,18,20</sup> Age does not become irrelevant just because it is not the metric used as the survival outcome. In the present case, if ignored, age of onset is a confounder because it is an additional important predictor of HD survival and is not independent of CAG length. Those with higher CAG lengths tend to become ill at an earlier age. One could hypothesize that more aggressive illness, driven by longer CAG repeat lengths, is imposed on a younger and essentially healthier body. This may approximately counterbalance the adverse effect on mortality of longer CAG repeats such that the apparent CAG length influence is small when onset age is not considered.

Age does not become irrelevant just because it is not the metric used as the survival outcome. In the present case, if ignored, age of onset is a confounder because it is an additional important predictor of HD survival and is not independent of CAG length. Those with higher CAG lengths tend to become ill at an earlier age. One could hypothesize that more aggressive illness, driven by longer CAG repeat lengths, is imposed on a younger and essentially healthier body. This may approximately counterbalance the adverse effect on mortality of longer CAG repeats such that the apparent CAG length influence is small when onset age is not considered.

HD age of onset determination is somewhat subjective. Indeed, the underlying concept is imprecise, given the insidious initial presentation of HD signs and symptoms. One might question whether the idea of onset age is even meaningful. Despite a high correlation, there is not perfect agreement between the patient's, the caregiver's, and clinician's estimate of this age, all usually reported retrospectively. There is no standardized objective definition of "onset," and this age determination would vary somewhat from clinician to clinician as well. The underlying reality is that the clinically significant signs and symptoms of HD typically develop as a transition over a period of a very few years, while the range of ages when this happens varies over decades. Furthermore, death typically occurs 10 to 20 years after this onset transition. Considering these relative timescales, the ages of onset, though imperfectly defined and imprecise, nonetheless reflect information meaningful to the questions at hand.

Our findings are consistent with the well-documented influence of CAG length upon both the age of clinical onset and rate of preclinical and early clinical progression. Although some important extrinsic risk factors (e.g., quality of care) and end-stage pathological processes that hasten death are unrelated to CAG length, the present analysis provides very strong evidence that the length of life after HD onset is not independent of CAG length.

The imprecision of onset age is seldom discussed and is perhaps underappreciated within the HD genetic literature. We have addressed the potential impact of rater discrepancies from the perspective of measurement error.

Our findings are consistent with the well-documented influence of CAG length upon both the age of clinical onset and rate of preclinical and early clinical progression. Although some important extrinsic risk factors (e.g., quality of care) and end-stage pathological processes that hasten death are unrelated to CAG length, the present analysis provides very strong evidence that the length of life after HD onset is not independent of CAG length.

We found an interaction with sex, showing that CAG length has a stronger influence on the age of all-cause mortality in women than in men. The only outcome we could analyze was death due to any cause, including deaths unrelated to HD. Matching for age, men are well known to have higher general mortality rates. This may dilute the apparent CAG effect in men and be the source of the statistical interaction. It is therefore unclear whether there is a sex difference in the CAG influence on the HD disease processes that lead to death.

The imprecision of onset age is seldom discussed and is perhaps underappreciated within the HD genetic literature. We have addressed the potential impact of rater discrepancies from the perspective of measurement error.

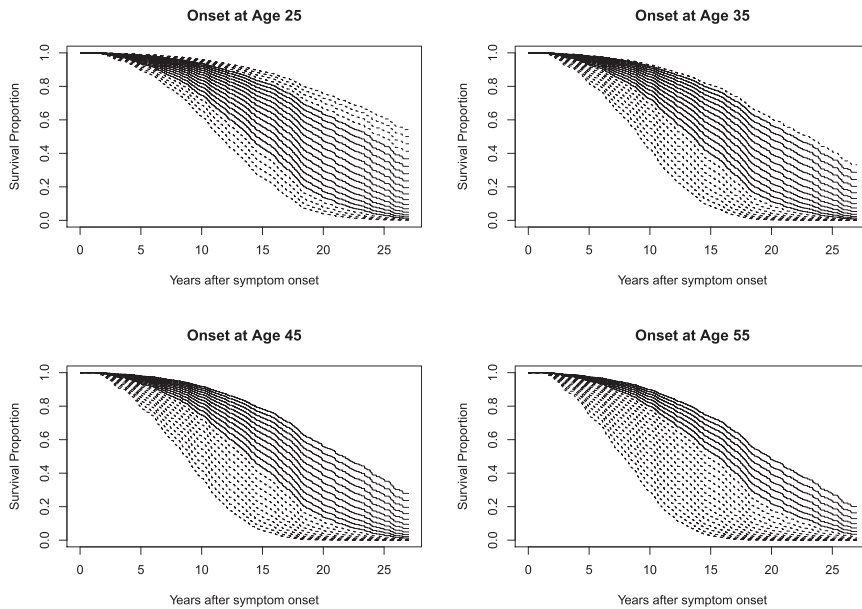

**Figure 2. Estimated CAG-specific survival curves in men for HD onset at ages 25, 35, 45, and 55**

Estimated survival curves for the CAG repeat range 39 to 59 are shown in each plot. Dashed lines represent CAG lengths present in fewer than 1% of observations (sexes combined) in the 5-year period around the stated onset ages (e.g., 42.5 to 47.5 for the onset age 45 plot). The values of the minimum and maximum CAG lengths occurring with at least 1% frequency are printed in black within each plot.

This is a special case of such error because survival length is measured from the age of onset. There is therefore a perfect negative correlation between measurement errors in age of onset (predictor) and length of survival (outcome). If onset is reported too early, then survival after onset is exaggerated. This may partially explain the fact that, for a constant CAG length, earlier reported onset predicts longer survival. Our simulation study suggested that measurement error tends to cause a slightly exaggerated bias in the estimated effect of CAG length, but this bias is far too weak to affect the conclusion that survival after onset has a substantial dependence upon CAG repeat length. With this conclusion in mind, we do not report simulation-adjusted estimates (Table S21) as our final best estimates, as they are only averages of a range of plausible but unmeasurable small biasing effects.

Consistent with the interpretation of Keum and colleagues,<sup>15</sup> we found no notable evidence of a survival effect for the short allele CAG length. Despite earlier claims to the contrary,<sup>21</sup> minor allele length has been convincingly shown to play no substantial role in determining age of HD onset.<sup>22</sup> Our sensitivity analysis further supports the assertion that variation of minor CAG allele length within its usual range has no bearing on the course of HD.

Although we did not have access to the brain bank database studied by Keum and colleagues,<sup>15</sup> it seems reasonable to hypothesize that lack of control for onset-age also confused the interpretation of that data. The use of standard linear regression methods may also have contributed to the lack of a detectable CAG effect. In many cases (including all cases when the proportional hazards assumption is correct), a statistical model based only on observed failures (i.e., deaths) biases the estimated magnitude of risk factor effects toward zero. If using a simple regression model, this can be avoided only if

a prospectively identified sample is followed until all members have died. Indeed, this bias is the motivation for survival analysis models that properly account for censored data from those who have not yet died. Despite the overwhelming statistical significance of CAG length in the current analysis, Registry is not a random sample from the HD population. Rather, it is a sample drawn from willing HD research participants. Therefore, models based on this data may be biased relative to the general HD population. Replication is quite a challenging proposition, given the rarity of HD and its slow disease course. However, the ongoing, worldwide ENROLL-HD study<sup>23</sup> may eventually provide adequate mortality data to attempt such a confirmation.

The CAG association with survival is strong enough to suggest the presence of CAG-length-dependent pathological mechanisms, even in the later stages of disease. Ongoing pathological research should account for this instead of focusing on explanations of why end-stage disease is unrelated to CAG length. The relationship between CAG length and survival will also have relevance to future disease-modifying clinical trials. As these trials begin to target more advanced disease stages, age-CAG combinations may help define patient risk groups appropriate for specific therapeutic approaches. The results also confirm that, as with current trials involving earlier disease stages, statistical control and balanced randomization of age and CAG length will be important in assuring unbiased and maximally powered trials.

As with other HD phenomena associated with CAG repeat length, we caution against clinical overinterpretation. Our findings suggest that clinicians should provide ongoing care with some expectation that adult-onset Huntington disease will progress more aggressively with longer CAG lengths. However, much individual variation in survival remains after accounting for CAG length. Despite the association of HD disease course with trinucleotide expansion length, within the contexts of personalized medicine and genetic counseling, we must continue to emphasize that CAG length is not destiny.

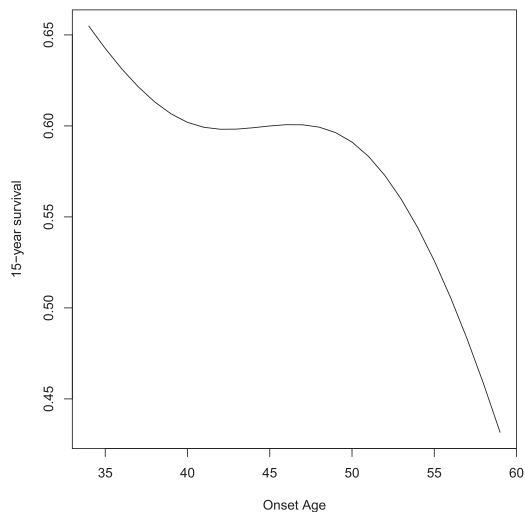

**Figure 3.** The nonlinear effect of onset age on 15-year HD survival

The general shape of the onset age effect remains the same regardless of CAG length or survival period. There is essentially no age effect between 40 and 50 years. However, outside of that range there is a marked negative relationship between onset age and survival.

### Supplemental information

Supplemental information can be found online at <https://doi.org/10.1016/j.ajhg.2021.12.002>.

### Acknowledgments

This work was supported by internal institutional support from the University of Iowa to the author. We acknowledge the data contributions of the Registry investigators of the European Huntington Disease Network, who are noted individually in both the [supplemental information](#) and at the EHDN site in [web resources](#). We further acknowledge gratefully the contribution of the Registry participants. The Registry study is supported by the European Huntington Disease Network (EHDN), funded by CHDI Foundation, Inc. The funding source had no role in study design; in the collection, analysis, and interpretation of data; in the writing of the report; or in the decision to submit the paper for publication.

### Declaration of interests

During the past 3 years, including the time in which this manuscript was written, the author received personal consulting and advisory board fees and non-financial support from Roche; personal consulting fees and non-financial support from Voyager Therapeutics; personal consulting and advisory board fees from Teva; personal consulting and advisory board fees from Novartis; personal consulting and advisory board fees and non-financial support from Wave Life Sciences; personal consulting fees from Takeda; personal and advisory board fees from AskBio; personal consulting fees from Uniqure; advisory board and personal consulting fees from Spark Therapeutics, personal consulting fees from Axon Advisors and LifeEDIT, and advisory board fees from the Huntington Study Group. None of this outside support funded the currently submitted work.

Received: July 28, 2021  
Accepted: December 3, 2021  
Published: December 22, 2021

### Web resources

OMIM, <https://www.omim.org/>  
Registry investigators of the European Huntington Disease Network, <http://www.ehdn.org/wp-content/uploads/REGISTRY-contributors-full-list.pdf>  
Registry study registration and description, <https://clinicaltrials.gov/ct2/show/NCT01590589>

### References

- Langbehn, D.R., Hayden, M.R., Paulsen, J.S.; and the PREDICT-HD Investigators of the Huntington Study Group (2010). CAG-repeat length and the age of onset in Huntington disease (HD): a review and validation study of statistical approaches. *Am. J. Med. Genet. B. Neuropsychiatr. Genet.* 153B, 397–408.
- Langbehn, D.R., Brinkman, R.R., Falush, D., Paulsen, J.S., Hayden, M.R.; and International Huntington's Disease Collaborative Group (2004). A new model for prediction of the age of onset and penetrance for Huntington's disease based on CAG length. *Clin. Genet.* 65, 267–277.
- Quarrell, O.W., Nance, M.A., Nopoulos, P., Paulsen, J.S., Smith, J.A., and Squitieri, F. (2013). Managing juvenile Huntington's disease. *Neurodegener. Dis. Manag.* 3, 3.
- Rosenblatt, A., Kumar, B.V., Mo, A., Welsh, C.S., Margolis, R.L., and Ross, C.A. (2012). Age, CAG repeat length, and clinical progression in Huntington's disease. *Mov. Disord.* 27, 272–276.
- Aylward, E.H., Nopoulos, P.C., Ross, C.A., Langbehn, D.R., Pierson, R.K., Mills, J.A., Johnson, H.J., Magnotta, V.A., Juhl, A.R., Paulsen, J.S.; and PREDICT-HD Investigators and Coordinators of Huntington Study Group (2011). Longitudinal change in regional brain volumes in prodromal Huntington disease. *J. Neurol. Neurosurg. Psychiatry* 82, 405–410.
- van den Bogaard, S.J., Dumas, E.M., Acharya, T.P., Johnson, H., Langbehn, D.R., Scahill, R.I., Tabrizi, S.J., van Buchem, M.A., van der Grond, J., Roos, R.A.; and TRACK-HD Investigator Group (2011). Early atrophy of pallidum and accumbens nucleus in Huntington's disease. *J. Neurol.* 258, 412–420.
- van der Plas, E., Langbehn, D.R., Conrad, A.L., Kosciak, T.R., Tereshchenko, A., Epping, E.A., Magnotta, V.A., and Nopoulos, P.C. (2019). Abnormal brain development in child and adolescent carriers of mutant huntingtin. *Neurology* 93, e1021–e1030.
- Tabrizi, S.J., Langbehn, D.R., Leavitt, B.R., Roos, R.A., Durr, A., Craufurd, D., Kennard, C., Hicks, S.L., Fox, N.C., Scahill, R.I., et al.; TRACK-HD investigators (2009). Biological and clinical manifestations of Huntington's disease in the longitudinal TRACK-HD study: cross-sectional analysis of baseline data. *Lancet Neurol.* 8, 791–801.
- Paulsen, J.S., Langbehn, D.R., Stout, J.C., Aylward, E., Ross, C.A., Nance, M., Guttman, M., Johnson, S., MacDonald, M., Beglinger, L.J., et al.; Predict-HD Investigators and Coordinators of the Huntington Study Group (2008). Detection of Huntington's disease decades before diagnosis: the Predict-HD study. *J. Neurol. Neurosurg. Psychiatry* 79, 874–880.

10. Chen, T., Wang, Y., Ma, Y., Marder, K., and Langbehn, D.R. (2012). Predicting Disease Onset from Mutation Status Using Proband and Relative Data with Applications to Huntington's Disease. *J. Probab. Stat.* *2012*, 375935.
11. Tabrizi, S.J., Scahill, R.I., Owen, G., Durr, A., Leavitt, B.R., Roos, R.A., Borowsky, B., Landwehrmeyer, B., Frost, C., Johnson, H., et al.; TRACK-HD Investigators (2013). Predictors of phenotypic progression and disease onset in premanifest and early-stage Huntington's disease in the TRACK-HD study: analysis of 36-month observational data. *Lancet Neurol.* *12*, 637–649.
12. Langbehn, D.R., Stout, J.C., Gregory, S., Mills, J.A., Durr, A., Leavitt, B.R., Roos, R.A.C., Long, J.D., Owen, G., Johnson, H.J., et al.; TRACK-HD and Track-On HD Groups (2019). Association of CAG Repeats With Long-term Progression in Huntington Disease. *JAMA Neurol.* *76*, 1375–1385.
13. Paulsen, J.S., Long, J.D., Ross, C.A., Harrington, D.L., Erwin, C.J., Williams, J.K., Westervelt, H.J., Johnson, H.J., Aylward, E.H., Zhang, Y., et al.; PREDICT-HD Investigators and Coordinators of the Huntington Study Group (2014). Prediction of manifest Huntington's disease with clinical and imaging measures: a prospective observational study. *Lancet Neurol.* *13*, 1193–1201.
14. Kiebertz, K., MacDonald, M., Shih, C., Feigin, A., Steinberg, K., Bordwell, K., Zimmerman, C., Srinidhi, J., Sotack, J., Gusella, J., et al. (1994). Trinucleotide repeat length and progression of illness in Huntington's disease. *J. Med. Genet.* *31*, 872–874.
15. Keum, J.W., Shin, A., Gillis, T., Mysore, J.S., Abu Elneel, K., Lucente, D., Hadzi, T., Holmans, P., Jones, L., Orth, M., et al. (2016). The HTT CAG-Expansion Mutation Determines Age at Death but Not Disease Duration in Huntington Disease. *Am. J. Hum. Genet.* *98*, 287–298.
16. Orth, M., Handley, O.J., Schwenke, C., Dunnett, S., Wild, E.J., Tabrizi, S.J., Landwehrmeyer, G.B.; and European Huntington's Disease Network (2011). Observing Huntington's disease: the European Huntington's Disease Network's REGISTRY. *J. Neurol. Neurosurg. Psychiatry* *82*, 1409–1412.
17. Harrell, J.F.E. (2015). *Regression Modeling Strategies: With Applications to Linear Models, Logistic and Ordinal Regression, and Survival Analysis*. Springer Series in Statistics, 2nd ed.
18. Lawless, J.F. (2003). *Statistical models and methods for lifetime data*, Second Edition (Hoboken, N.J.: Wiley-Interscience).
19. Dickson, E.R., Grambsch, P.M., Fleming, T.R., Fisher, L.D., and Langworthy, A. (1989). Prognosis in primary biliary cirrhosis: model for decision making. *Hepatology* *10*, 1–7.
20. Fleming, T.R., and Harrington, D.P. (2005). *Counting processes and survival analysis* (Hoboken, N.J.: Wiley-Interscience).
21. Djoussé, L., Knowlton, B., Hayden, M., Almqvist, E.W., Brinkman, R., Ross, C., Margolis, R., Rosenblatt, A., Durr, A., Dode, C., et al. (2003). Interaction of normal and expanded CAG repeat sizes influences age at onset of Huntington disease. *Am. J. Med. Genet. A.* *119A*, 279–282.
22. Lee, J.M., Ramos, E.M., Lee, J.H., Gillis, T., Mysore, J.S., Hayden, M.R., Warby, S.C., Morrison, P., Nance, M., Ross, C.A., et al.; PREDICT-HD study of the Huntington Study Group (HSG); REGISTRY study of the European Huntington's Disease Network; HD-MAPS Study Group; and COHORT study of the HSG (2012). CAG repeat expansion in Huntington disease determines age at onset in a fully dominant fashion. *Neurology* *78*, 690–695.
23. Landwehrmeyer, G.B., Fitzer-Attas, C.J., Giuliano, J.D., Gonçalves, N., Anderson, K.E., Cardoso, F., Ferreira, J.J., Mestre, T.A., Stout, J.C., and Sampaio, C. (2016). Data Analytics from Enroll-HD, a Global Clinical Research Platform for Huntington's Disease. *Mov. Disord. Clin. Pract.* (Hoboken) *4*, 212–224.



**The American Journal of Human Genetics, Volume 109**

**Supplemental information**

**Longer CAG repeat length is associated  
with shorter survival after disease onset  
in Huntington disease**

**Douglas R. Langbehn and for the Registry Investigators of the European Huntington  
Disease Network**

Figure S1. ZPH proportional hazard goodness of fit test results

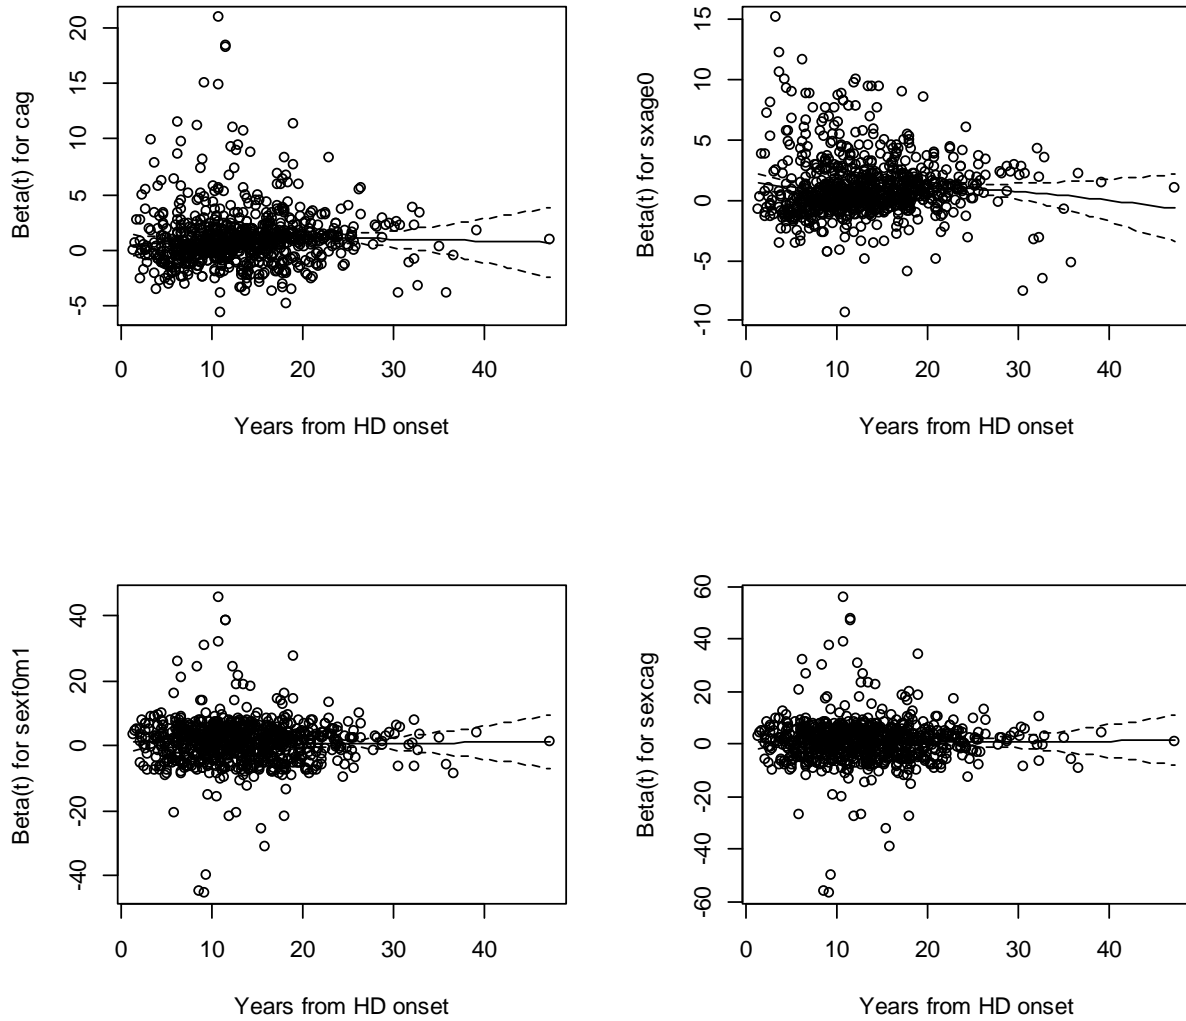

Abbreviations: *cag* = main effect of CAG length, *sxage0* = Joint effect of 3 degree-of-freedom restricted cubic spline fit of age-at-onset; *sexf0m1* = main effect of men vs women; *sexcag* = interaction of CAG and men vs women.

The near linearity of the Beta(t) coefficients, especially up to 30 years from HD onset, indicate good fit of the proportional hazards assumptions in the main model (Table 2 of the paper).

Supplemental Table 1. ZPH Proportional Hazard Goodness-of-fit for the final model

| <b>Variables</b>       | <b>rho</b> | <b>Chi-square</b> | <b>p</b> |
|------------------------|------------|-------------------|----------|
| CAG Main Effect        | 0.0355     | 0.883             | 0.347    |
| Age of HD Onset (3 df) | -0.0235    | 0.442             | 0.506    |
| Men vs Women           | -0.0191    | 0.278             | 0.598    |
| CAG by (M vs W)        | -0.0112    | 0.096             | 0.757    |

*p* = p value. (Also see Supplemental Figure 1.)

Supplemental Table 2. Frequency of CAG Lengths in 5-Year Windows Surrounding Plotted Ages in Figures 1 and 2 (Main Text)

Age 23-27

|     | 39 | 40 | 41 | 42 | 43 | 44 | 45 | 46 | 47 | 48 | 49 | 50 | 51 | 52 | 53 | 54 | 55 | 56 | 57 | 58 | 59 | 60 | 62 | 63 | 63 | tot |
|-----|----|----|----|----|----|----|----|----|----|----|----|----|----|----|----|----|----|----|----|----|----|----|----|----|----|-----|
| F   | 1  | 0  | 3  | 2  | 5  | 7  | 8  | 15 | 17 | 12 | 20 | 25 | 15 | 15 | 22 | 18 | 12 | 8  | 6  | 3  | 5  | 2  | 2  | 0  | 0  | 223 |
| M   | 0  | 1  | 3  | 3  | 6  | 5  | 10 | 8  | 11 | 15 | 18 | 25 | 15 | 13 | 15 | 8  | 7  | 3  | 3  | 1  | 2  | 1  | 3  | 1  | 1  | 178 |
| tot | 1  | 1  | 6  | 5  | 11 | 12 | 18 | 23 | 28 | 27 | 38 | 50 | 30 | 28 | 37 | 26 | 19 | 11 | 9  | 4  | 7  | 3  | 5  | 1  | 1  | 401 |

Age 33-37

|     | 36 | 38 | 39 | 40 | 41 | 42 | 43 | 44  | 45  | 46  | 47  | 48 | 49 | 50 | 51 | 52 | 53 | 54 | 55 | 56 | 58 | 68 | tot |
|-----|----|----|----|----|----|----|----|-----|-----|-----|-----|----|----|----|----|----|----|----|----|----|----|----|-----|
| F   | 2  | 1  | 2  | 5  | 7  | 22 | 38 | 44  | 69  | 100 | 82  | 43 | 37 | 22 | 10 | 3  | 0  | 3  | 0  | 0  | 0  | 0  | 490 |
| M   | 0  | 0  | 2  | 5  | 8  | 22 | 35 | 63  | 64  | 75  | 79  | 48 | 38 | 22 | 11 | 2  | 1  | 0  | 2  | 1  | 1  | 1  | 480 |
| tot | 2  | 1  | 4  | 10 | 15 | 44 | 73 | 107 | 133 | 175 | 161 | 91 | 75 | 44 | 21 | 5  | 1  | 3  | 2  | 1  | 1  | 1  | 970 |

Age 43-47

|     | 37 | 38 | 39 | 40 | 41 | 42  | 43  | 44  | 45  | 46 | 47 | 48 | 49 | 50 | 51 | 57 | tot  |
|-----|----|----|----|----|----|-----|-----|-----|-----|----|----|----|----|----|----|----|------|
| F   | 3  | 4  | 5  | 11 | 40 | 106 | 118 | 166 | 101 | 44 | 27 | 11 | 4  | 0  | 2  | 0  | 642  |
| M   | 1  | 2  | 8  | 11 | 28 | 108 | 154 | 142 | 80  | 34 | 18 | 7  | 5  | 3  | 0  | 1  | 602  |
| tot | 4  | 6  | 13 | 22 | 68 | 214 | 272 | 308 | 181 | 78 | 45 | 18 | 9  | 3  | 2  | 1  | 1244 |

Age 53-57

|     | 36 | 37 | 38 | 39 | 40 | 41  | 42  | 43  | 44 | 45 | 46 | 47 | 48 | 49 | 50 | 52 | 54 | tot |
|-----|----|----|----|----|----|-----|-----|-----|----|----|----|----|----|----|----|----|----|-----|
| F   | 0  | 3  | 5  | 12 | 35 | 113 | 162 | 109 | 34 | 16 | 2  | 3  | 1  | 0  | 0  | 0  | 1  | 496 |
| M   | 1  | 0  | 4  | 6  | 43 | 127 | 171 | 83  | 30 | 11 | 3  | 2  | 3  | 1  | 1  | 1  | 0  | 487 |
| tot | 1  | 3  | 9  | 18 | 78 | 240 | 333 | 192 | 64 | 27 | 5  | 5  | 4  | 1  | 1  | 1  | 1  | 983 |

Supplemental Table 3. Survival curve estimates by CAG length for women with HD onset at age 25

| <b>CAG</b>   | <b>39*</b>  |              |              | <b>40*</b>  |              |              | <b>41</b>   |              |              | <b>42</b>   |              |              | <b>43</b>   |              |              | <b>44</b>   |              |              |
|--------------|-------------|--------------|--------------|-------------|--------------|--------------|-------------|--------------|--------------|-------------|--------------|--------------|-------------|--------------|--------------|-------------|--------------|--------------|
| <b>years</b> | <i>surv</i> | <i>lower</i> | <i>upper</i> |
| <b>5</b>     | 0.991       | 0.986        | 0.995        | 0.989       | 0.985        | 0.994        | 0.988       | 0.983        | 0.993        | 0.987       | 0.981        | 0.992        | 0.985       | 0.979        | 0.991        | 0.983       | 0.976        | 0.989        |
| <b>10</b>    | 0.960       | 0.944        | 0.976        | 0.955       | 0.938        | 0.971        | 0.949       | 0.932        | 0.967        | 0.943       | 0.924        | 0.961        | 0.935       | 0.916        | 0.955        | 0.927       | 0.907        | 0.948        |
| <b>15</b>    | 0.889       | 0.850        | 0.929        | 0.875       | 0.835        | 0.918        | 0.860       | 0.818        | 0.905        | 0.844       | 0.800        | 0.890        | 0.825       | 0.780        | 0.873        | 0.805       | 0.758        | 0.854        |
| <b>20</b>    | 0.756       | 0.683        | 0.837        | 0.729       | 0.654        | 0.812        | 0.699       | 0.623        | 0.785        | 0.667       | 0.591        | 0.754        | 0.633       | 0.557        | 0.720        | 0.596       | 0.520        | 0.684        |
| <b>25</b>    | 0.613       | 0.514        | 0.732        | 0.575       | 0.477        | 0.695        | 0.535       | 0.438        | 0.654        | 0.493       | 0.399        | 0.610        | 0.450       | 0.359        | 0.564        | 0.405       | 0.319        | 0.515        |
| <b>CAG</b>   | <b>45</b>   |              |              | <b>46</b>   |              |              | <b>47</b>   |              |              | <b>48</b>   |              |              | <b>49</b>   |              |              | <b>50</b>   |              |              |
| <b>years</b> | <i>surv</i> | <i>lower</i> | <i>upper</i> |
| <b>5</b>     | 0.981       | 0.974        | 0.988        | 0.978       | 0.970        | 0.986        | 0.975       | 0.967        | 0.984        | 0.972       | 0.963        | 0.981        | 0.968       | 0.958        | 0.979        | 0.964       | 0.953        | 0.976        |
| <b>10</b>    | 0.918       | 0.896        | 0.940        | 0.908       | 0.885        | 0.931        | 0.897       | 0.872        | 0.921        | 0.884       | 0.858        | 0.910        | 0.870       | 0.842        | 0.898        | 0.854       | 0.824        | 0.885        |
| <b>15</b>    | 0.782       | 0.734        | 0.833        | 0.757       | 0.708        | 0.810        | 0.730       | 0.680        | 0.785        | 0.701       | 0.649        | 0.757        | 0.669       | 0.616        | 0.728        | 0.635       | 0.579        | 0.697        |
| <b>20</b>    | 0.558       | 0.483        | 0.644        | 0.517       | 0.443        | 0.602        | 0.474       | 0.402        | 0.558        | 0.430       | 0.360        | 0.513        | 0.385       | 0.318        | 0.467        | 0.340       | 0.275        | 0.421        |
| <b>25</b>    | 0.360       | 0.279        | 0.465        | 0.315       | 0.240        | 0.414        | 0.271       | 0.202        | 0.364        | 0.229       | 0.167        | 0.315        | 0.189       | 0.133        | 0.268        | 0.152       | 0.103        | 0.225        |
| <b>CAG</b>   | <b>51</b>   |              |              | <b>52</b>   |              |              | <b>53</b>   |              |              | <b>54</b>   |              |              | <b>55</b>   |              |              | <b>56</b>   |              |              |
| <b>years</b> | <i>surv</i> | <i>lower</i> | <i>upper</i> | <i>surv</i> | <i>lower</i> | <i>upper</i> | <i>surv</i> | <i>lower</i> | <i>upper</i> | <i>surv</i> | <i>upper</i> | <i>upper</i> | <i>surv</i> | <i>upper</i> | <i>upper</i> | <i>surv</i> | <i>upper</i> | <i>upper</i> |
| <b>5</b>     | 0.947       | 0.973        | 0.955        | 0.941       | 0.969        | 0.949        | 0.933       | 0.965        | 0.943        | 0.925       | 0.961        | 0.935        | 0.915       | 0.956        | 0.927        | 0.904       | 0.951        | 0.947        |
| <b>10</b>    | 0.804       | 0.870        | 0.817        | 0.782       | 0.855        | 0.796        | 0.756       | 0.838        | 0.773        | 0.728       | 0.820        | 0.747        | 0.697       | 0.801        | 0.719        | 0.662       | 0.781        | 0.804        |
| <b>15</b>    | 0.540       | 0.664        | 0.560        | 0.498       | 0.630        | 0.519        | 0.453       | 0.595        | 0.477        | 0.406       | 0.559        | 0.433        | 0.358       | 0.523        | 0.388        | 0.309       | 0.487        | 0.540        |
| <b>20</b>    | 0.232       | 0.376        | 0.252        | 0.191       | 0.332        | 0.210        | 0.152       | 0.290        | 0.172        | 0.117       | 0.251        | 0.136        | 0.087       | 0.215        | 0.105        | 0.061       | 0.182        | 0.232        |
| <b>25</b>    | 0.076       | 0.185        | 0.090        | 0.054       | 0.150        | 0.066        | 0.036       | 0.119        | 0.046        | 0.023       | 0.093        | 0.031        | 0.013       | 0.071        | 0.020        | 0.007       | 0.054        | 0.076        |
| <b>CAG</b>   | <b>57</b>   |              |              | <b>58</b>   |              |              | <b>59</b>   |              |              |             |              |              |             |              |              |             |              |              |
| <b>years</b> | <i>surv</i> | <i>lower</i> | <i>upper</i> | <i>surv</i> | <i>lower</i> | <i>upper</i> | <i>surv</i> | <i>lower</i> | <i>upper</i> |             |              |              |             |              |              |             |              |              |
| <b>5</b>     | 0.918       | 0.891        | 0.946        | 0.908       | 0.877        | 0.940        | 0.897       | 0.861        | 0.934        |             |              |              |             |              |              |             |              |              |
| <b>10</b>    | 0.689       | 0.625        | 0.760        | 0.656       | 0.584        | 0.738        | 0.621       | 0.540        | 0.715        |             |              |              |             |              |              |             |              |              |
| <b>15</b>    | 0.343       | 0.261        | 0.450        | 0.298       | 0.215        | 0.414        | 0.254       | 0.171        | 0.378        |             |              |              |             |              |              |             |              |              |
| <b>20</b>    | 0.078       | 0.041        | 0.151        | 0.056       | 0.025        | 0.125        | 0.039       | 0.015        | 0.101        |             |              |              |             |              |              |             |              |              |
| <b>25</b>    | 0.012       | 0.003        | 0.039        | 0.007       | 0.002        | 0.028        | 0.003       | 0.001        | 0.020        |             |              |              |             |              |              |             |              |              |

Data is plotted in Figure 1 of the main article. *surv* = survival rate, *lower* = lower 95% confidence bound, *upper* = upper 95% confidence bound.

\* CAG length represents less than 1% of those onset HD onset in this age range. Estimate for this CAG length is an extrapolation from the survival model.

Supplemental Table 4. Survival curve estimates by CAG length for women with HD onset at age 35

| <b>CAG</b>   | <b>39*</b>  |              |              | <b>40*</b>  |              |              | <b>41</b>   |              |              | <b>42</b>   |              |              | <b>43</b>   |              |              | <b>44</b>   |              |              |
|--------------|-------------|--------------|--------------|-------------|--------------|--------------|-------------|--------------|--------------|-------------|--------------|--------------|-------------|--------------|--------------|-------------|--------------|--------------|
| <b>years</b> | <i>surv</i> | <i>lower</i> | <i>upper</i> |
| <b>5</b>     | 0.983       | 0.977        | 0.989        | 0.981       | 0.975        | 0.987        | 0.979       | 0.972        | 0.986        | 0.976       | 0.968        | 0.983        | 0.973       | 0.964        | 0.981        | 0.969       | 0.960        | 0.978        |
| <b>10</b>    | 0.929       | 0.910        | 0.948        | 0.920       | 0.901        | 0.940        | 0.910       | 0.890        | 0.930        | 0.899       | 0.878        | 0.920        | 0.886       | 0.865        | 0.909        | 0.873       | 0.850        | 0.896        |
| <b>15</b>    | 0.809       | 0.767        | 0.853        | 0.787       | 0.745        | 0.831        | 0.763       | 0.720        | 0.807        | 0.736       | 0.694        | 0.781        | 0.707       | 0.665        | 0.753        | 0.676       | 0.633        | 0.722        |
| <b>20</b>    | 0.604       | 0.535        | 0.682        | 0.566       | 0.498        | 0.642        | 0.525       | 0.460        | 0.599        | 0.483       | 0.421        | 0.554        | 0.439       | 0.380        | 0.507        | 0.394       | 0.338        | 0.459        |
| <b>25</b>    | 0.414       | 0.334        | 0.514        | 0.369       | 0.295        | 0.463        | 0.324       | 0.256        | 0.411        | 0.280       | 0.218        | 0.359        | 0.237       | 0.182        | 0.309        | 0.197       | 0.148        | 0.262        |
| <b>CAG</b>   | <b>45</b>   |              |              | <b>46</b>   |              |              | <b>47</b>   |              |              | <b>48</b>   |              |              | <b>49</b>   |              |              | <b>50</b>   |              |              |
| <b>years</b> | <i>surv</i> | <i>lower</i> | <i>upper</i> |
| <b>5</b>     | 0.965       | 0.955        | 0.975        | 0.961       | 0.950        | 0.972        | 0.956       | 0.943        | 0.968        | 0.950       | 0.936        | 0.964        | 0.944       | 0.928        | 0.960        | 0.937       | 0.919        | 0.955        |
| <b>10</b>    | 0.857       | 0.833        | 0.882        | 0.840       | 0.814        | 0.867        | 0.821       | 0.793        | 0.851        | 0.801       | 0.769        | 0.833        | 0.778       | 0.742        | 0.815        | 0.753       | 0.712        | 0.796        |
| <b>15</b>    | 0.642       | 0.598        | 0.689        | 0.606       | 0.561        | 0.656        | 0.568       | 0.520        | 0.621        | 0.527       | 0.476        | 0.585        | 0.485       | 0.429        | 0.549        | 0.442       | 0.380        | 0.512        |
| <b>20</b>    | 0.349       | 0.296        | 0.412        | 0.304       | 0.253        | 0.366        | 0.261       | 0.211        | 0.322        | 0.219       | 0.170        | 0.281        | 0.179       | 0.133        | 0.242        | 0.143       | 0.099        | 0.207        |
| <b>25</b>    | 0.159       | 0.116        | 0.218        | 0.125       | 0.088        | 0.178        | 0.095       | 0.063        | 0.144        | 0.070       | 0.043        | 0.114        | 0.050       | 0.028        | 0.088        | 0.034       | 0.017        | 0.067        |
| <b>CAG</b>   | <b>51</b>   |              |              | <b>52</b>   |              |              | <b>53*</b>  |              |              | <b>54*</b>  |              |              | <b>55*</b>  |              |              | <b>56*</b>  |              |              |
| <b>years</b> | <i>surv</i> | <i>lower</i> | <i>upper</i> | <i>surv</i> | <i>lower</i> | <i>upper</i> | <i>surv</i> | <i>lower</i> | <i>upper</i> | <i>surv</i> | <i>upper</i> | <i>upper</i> | <i>surv</i> | <i>upper</i> | <i>upper</i> | <i>surv</i> | <i>upper</i> | <i>upper</i> |
| <b>5</b>     | 0.929       | 0.908        | 0.950        | 0.920       | 0.896        | 0.945        | 0.910       | 0.882        | 0.939        | 0.899       | 0.867        | 0.933        | 0.887       | 0.849        | 0.926        | 0.873       | 0.829        | 0.918        |
| <b>10</b>    | 0.725       | 0.678        | 0.775        | 0.695       | 0.641        | 0.754        | 0.663       | 0.601        | 0.732        | 0.628       | 0.557        | 0.709        | 0.592       | 0.511        | 0.685        | 0.552       | 0.462        | 0.660        |
| <b>15</b>    | 0.397       | 0.331        | 0.476        | 0.352       | 0.281        | 0.440        | 0.307       | 0.233        | 0.404        | 0.263       | 0.188        | 0.369        | 0.221       | 0.146        | 0.335        | 0.182       | 0.109        | 0.301        |
| <b>20</b>    | 0.111       | 0.071        | 0.174        | 0.083       | 0.048        | 0.145        | 0.060       | 0.031        | 0.119        | 0.042       | 0.018        | 0.096        | 0.028       | 0.010        | 0.077        | 0.017       | 0.005        | 0.060        |
| <b>25</b>    | 0.022       | 0.009        | 0.050        | 0.013       | 0.005        | 0.037        | 0.007       | 0.002        | 0.026        | 0.004       | 0.001        | 0.018        | 0.002       | 0.000        | 0.012        | 0.001       | 0.000        | 0.008        |
| <b>CAG</b>   | <b>57*</b>  |              |              | <b>58*</b>  |              |              | <b>59*</b>  |              |              |             |              |              |             |              |              |             |              |              |
| <b>years</b> | <i>surv</i> | <i>lower</i> | <i>upper</i> | <i>surv</i> | <i>lower</i> | <i>upper</i> | <i>surv</i> | <i>lower</i> | <i>upper</i> |             |              |              |             |              |              |             |              |              |
| <b>5</b>     | 0.857       | 0.807        | 0.911        | 0.840       | 0.782        | 0.903        | 0.821       | 0.755        | 0.894        |             |              |              |             |              |              |             |              |              |
| <b>10</b>    | 0.511       | 0.412        | 0.634        | 0.468       | 0.361        | 0.608        | 0.424       | 0.310        | 0.581        |             |              |              |             |              |              |             |              |              |
| <b>15</b>    | 0.145       | 0.078        | 0.269        | 0.113       | 0.054        | 0.238        | 0.085       | 0.034        | 0.210        |             |              |              |             |              |              |             |              |              |
| <b>20</b>    | 0.010       | 0.002        | 0.046        | 0.006       | 0.001        | 0.035        | 0.003       | 0.000        | 0.026        |             |              |              |             |              |              |             |              |              |
| <b>25</b>    | 0.000       | 0.000        | 0.005        | 0.000       | 0.000        | 0.003        | 0.000       | 0.000        | 0.002        |             |              |              |             |              |              |             |              |              |

Data is plotted in Figure 1 of the main article. *surv* = survival rate, *lower* = lower 95% confidence bound, *upper* = upper 95% confidence bound.

\* CAG length represents less than 1% of those onset HD onset in this age range. Estimate for this CAG length is an extrapolation from the survival model.

Supplemental Table 5. Survival curve estimates by CAG length for women with HD onset at age 45

| <b>CAG</b>   | <b>39*</b>  |              |              | <b>40</b>   |              |              | <b>41</b>   |              |              | <b>42</b>   |              |              | <b>43</b>   |              |              | <b>44</b>   |              |              |
|--------------|-------------|--------------|--------------|-------------|--------------|--------------|-------------|--------------|--------------|-------------|--------------|--------------|-------------|--------------|--------------|-------------|--------------|--------------|
| <b>years</b> | <i>surv</i> | <i>lower</i> | <i>upper</i> |
| <b>5</b>     | 0.981       | 0.974        | 0.987        | 0.978       | 0.971        | 0.985        | 0.975       | 0.968        | 0.983        | 0.972       | 0.964        | 0.980        | 0.969       | 0.960        | 0.978        | 0.965       | 0.955        | 0.975        |
| <b>10</b>    | 0.918       | 0.901        | 0.936        | 0.908       | 0.890        | 0.927        | 0.897       | 0.878        | 0.916        | 0.884       | 0.864        | 0.904        | 0.870       | 0.849        | 0.891        | 0.854       | 0.832        | 0.877        |
| <b>15</b>    | 0.783       | 0.745        | 0.822        | 0.758       | 0.720        | 0.798        | 0.731       | 0.694        | 0.771        | 0.702       | 0.664        | 0.742        | 0.670       | 0.632        | 0.711        | 0.636       | 0.596        | 0.679        |
| <b>20</b>    | 0.559       | 0.499        | 0.626        | 0.518       | 0.460        | 0.582        | 0.475       | 0.420        | 0.537        | 0.431       | 0.379        | 0.490        | 0.386       | 0.336        | 0.444        | 0.341       | 0.292        | 0.398        |
| <b>25</b>    | 0.362       | 0.294        | 0.444        | 0.317       | 0.255        | 0.393        | 0.272       | 0.217        | 0.343        | 0.230       | 0.180        | 0.294        | 0.190       | 0.145        | 0.249        | 0.153       | 0.113        | 0.207        |
| <b>CAG</b>   | <b>45</b>   |              |              | <b>46</b>   |              |              | <b>47</b>   |              |              | <b>48</b>   |              |              | <b>49*</b>  |              |              | <b>50*</b>  |              |              |
| <b>years</b> | <i>surv</i> | <i>lower</i> | <i>upper</i> |
| <b>5</b>     | 0.960       | 0.949        | 0.971        | 0.955       | 0.942        | 0.968        | 0.949       | 0.935        | 0.964        | 0.943       | 0.926        | 0.959        | 0.936       | 0.917        | 0.955        | 0.927       | 0.906        | 0.950        |
| <b>10</b>    | 0.837       | 0.813        | 0.862        | 0.818       | 0.790        | 0.846        | 0.797       | 0.765        | 0.829        | 0.773       | 0.737        | 0.811        | 0.748       | 0.706        | 0.793        | 0.720       | 0.671        | 0.773        |
| <b>15</b>    | 0.600       | 0.557        | 0.645        | 0.561       | 0.515        | 0.611        | 0.520       | 0.469        | 0.577        | 0.478       | 0.421        | 0.542        | 0.434       | 0.371        | 0.507        | 0.389       | 0.321        | 0.472        |
| <b>20</b>    | 0.297       | 0.248        | 0.354        | 0.253       | 0.205        | 0.312        | 0.211       | 0.164        | 0.273        | 0.173       | 0.126        | 0.236        | 0.137       | 0.093        | 0.202        | 0.106       | 0.066        | 0.171        |
| <b>25</b>    | 0.120       | 0.084        | 0.170        | 0.091       | 0.060        | 0.138        | 0.066       | 0.040        | 0.109        | 0.047       | 0.025        | 0.086        | 0.031       | 0.015        | 0.066        | 0.020       | 0.008        | 0.049        |
| <b>CAG</b>   | <b>51*</b>  |              |              | <b>52*</b>  |              |              | <b>53*</b>  |              |              | <b>54*</b>  |              |              | <b>55*</b>  |              |              | <b>56*</b>  |              |              |
| <b>years</b> | <i>surv</i> | <i>lower</i> | <i>upper</i> | <i>surv</i> | <i>lower</i> | <i>upper</i> | <i>surv</i> | <i>lower</i> | <i>upper</i> | <i>surv</i> | <i>upper</i> | <i>upper</i> | <i>surv</i> | <i>upper</i> | <i>upper</i> | <i>surv</i> | <i>upper</i> | <i>upper</i> |
| <b>5</b>     | 0.918       | 0.893        | 0.944        | 0.908       | 0.879        | 0.939        | 0.897       | 0.863        | 0.932        | 0.884       | 0.845        | 0.926        | 0.870       | 0.824        | 0.919        | 0.854       | 0.801        | 0.911        |
| <b>10</b>    | 0.690       | 0.633        | 0.752        | 0.657       | 0.591        | 0.730        | 0.622       | 0.547        | 0.708        | 0.585       | 0.500        | 0.684        | 0.545       | 0.450        | 0.660        | 0.504       | 0.400        | 0.635        |
| <b>15</b>    | 0.344       | 0.271        | 0.437        | 0.299       | 0.223        | 0.402        | 0.256       | 0.178        | 0.368        | 0.214       | 0.137        | 0.334        | 0.175       | 0.101        | 0.302        | 0.139       | 0.072        | 0.270        |
| <b>20</b>    | 0.079       | 0.044        | 0.143        | 0.057       | 0.027        | 0.118        | 0.039       | 0.016        | 0.096        | 0.026       | 0.009        | 0.077        | 0.016       | 0.004        | 0.060        | 0.009       | 0.002        | 0.047        |
| <b>25</b>    | 0.012       | 0.004        | 0.036        | 0.007       | 0.002        | 0.026        | 0.003       | 0.001        | 0.018        | 0.002       | 0.000        | 0.013        | 0.001       | 0.000        | 0.008        | 0.000       | 0.000        | 0.005        |
| <b>CAG</b>   | <b>57*</b>  |              |              | <b>58*</b>  |              |              | <b>59*</b>  |              |              |             |              |              |             |              |              |             |              |              |
| <b>years</b> | <i>surv</i> | <i>lower</i> | <i>upper</i> | <i>surv</i> | <i>lower</i> | <i>upper</i> | <i>surv</i> | <i>lower</i> | <i>upper</i> |             |              |              |             |              |              |             |              |              |
| <b>5</b>     | 0.837       | 0.776        | 0.903        | 0.818       | 0.748        | 0.895        | 0.797       | 0.716        | 0.886        |             |              |              |             |              |              |             |              |              |
| <b>10</b>    | 0.461       | 0.348        | 0.609        | 0.416       | 0.297        | 0.583        | 0.371       | 0.248        | 0.556        |             |              |              |             |              |              |             |              |              |
| <b>15</b>    | 0.108       | 0.048        | 0.240        | 0.081       | 0.031        | 0.212        | 0.058       | 0.018        | 0.186        |             |              |              |             |              |              |             |              |              |
| <b>20</b>    | 0.005       | 0.001        | 0.036        | 0.003       | 0.000        | 0.027        | 0.001       | 0.000        | 0.020        |             |              |              |             |              |              |             |              |              |
| <b>25</b>    | 0.000       | 0.000        | 0.003        | 0.000       | 0.000        | 0.002        | 0.000       | 0.000        | 0.001        |             |              |              |             |              |              |             |              |              |

Data is plotted in Figure 1 of the main article. *surv* = survival rate, *lower* = lower 95% confidence bound, *upper* = upper 95% confidence bound.

\* CAG length represents less than 1% of those onset HD onset in this age range. Estimate for this CAG length is an extrapolation from the survival model.

Supplemental Table 6. Survival curve estimates by CAG length for women with HD onset at age 55

| <b>CAG</b>   | <b>39</b>   |              |              | <b>40</b>   |              |              | <b>41</b>   |              |              | <b>42</b>   |              |              | <b>43</b>   |              |              | <b>44</b>   |              |              |
|--------------|-------------|--------------|--------------|-------------|--------------|--------------|-------------|--------------|--------------|-------------|--------------|--------------|-------------|--------------|--------------|-------------|--------------|--------------|
| <b>years</b> | <i>surv</i> | <i>lower</i> | <i>upper</i> |
| <b>5</b>     | 0.976       | 0.968        | 0.984        | 0.973       | 0.964        | 0.981        | 0.969       | 0.960        | 0.979        | 0.965       | 0.955        | 0.976        | 0.961       | 0.949        | 0.972        | 0.956       | 0.943        | 0.969        |
| <b>10</b>    | 0.898       | 0.877        | 0.921        | 0.886       | 0.863        | 0.909        | 0.872       | 0.848        | 0.896        | 0.857       | 0.832        | 0.882        | 0.839       | 0.813        | 0.867        | 0.820       | 0.791        | 0.850        |
| <b>15</b>    | 0.735       | 0.690        | 0.783        | 0.706       | 0.661        | 0.754        | 0.674       | 0.629        | 0.723        | 0.641       | 0.595        | 0.690        | 0.605       | 0.557        | 0.656        | 0.566       | 0.517        | 0.620        |
| <b>20</b>    | 0.481       | 0.415        | 0.557        | 0.437       | 0.374        | 0.510        | 0.392       | 0.333        | 0.462        | 0.347       | 0.290        | 0.415        | 0.302       | 0.248        | 0.368        | 0.259       | 0.207        | 0.323        |
| <b>25</b>    | 0.278       | 0.212        | 0.365        | 0.235       | 0.176        | 0.314        | 0.195       | 0.143        | 0.266        | 0.157       | 0.112        | 0.222        | 0.124       | 0.084        | 0.181        | 0.094       | 0.061        | 0.146        |
| <b>CAG</b>   | <b>45</b>   |              |              | <b>46*</b>  |              |              | <b>47*</b>  |              |              | <b>48*</b>  |              |              | <b>49*</b>  |              |              | <b>50*</b>  |              |              |
| <b>years</b> | <i>surv</i> | <i>lower</i> | <i>upper</i> |
| <b>5</b>     | 0.950       | 0.936        | 0.965        | 0.944       | 0.927        | 0.960        | 0.937       | 0.918        | 0.955        | 0.929       | 0.907        | 0.950        | 0.920       | 0.895        | 0.945        | 0.910       | 0.881        | 0.939        |
| <b>10</b>    | 0.800       | 0.768        | 0.833        | 0.777       | 0.741        | 0.814        | 0.751       | 0.711        | 0.794        | 0.724       | 0.677        | 0.774        | 0.694       | 0.640        | 0.752        | 0.662       | 0.600        | 0.729        |
| <b>15</b>    | 0.526       | 0.473        | 0.584        | 0.483       | 0.427        | 0.547        | 0.440       | 0.379        | 0.510        | 0.395       | 0.330        | 0.473        | 0.350       | 0.281        | 0.436        | 0.305       | 0.233        | 0.400        |
| <b>20</b>    | 0.217       | 0.167        | 0.281        | 0.178       | 0.131        | 0.241        | 0.142       | 0.098        | 0.205        | 0.110       | 0.070        | 0.172        | 0.082       | 0.047        | 0.143        | 0.059       | 0.030        | 0.117        |
| <b>25</b>    | 0.069       | 0.042        | 0.115        | 0.049       | 0.027        | 0.089        | 0.033       | 0.016        | 0.068        | 0.021       | 0.009        | 0.050        | 0.013       | 0.004        | 0.037        | 0.007       | 0.002        | 0.026        |
| <b>CAG</b>   | <b>51*</b>  |              |              | <b>52*</b>  |              |              | <b>53*</b>  |              |              | <b>54*</b>  |              |              | <b>55*</b>  |              |              | <b>56*</b>  |              |              |
| <b>years</b> | <i>surv</i> | <i>lower</i> | <i>upper</i> | <i>surv</i> | <i>lower</i> | <i>upper</i> | <i>surv</i> | <i>lower</i> | <i>upper</i> | <i>surv</i> | <i>upper</i> | <i>upper</i> | <i>surv</i> | <i>upper</i> | <i>upper</i> | <i>surv</i> | <i>upper</i> | <i>upper</i> |
| <b>5</b>     | 0.898       | 0.866        | 0.932        | 0.886       | 0.848        | 0.925        | 0.872       | 0.829        | 0.918        | 0.857       | 0.806        | 0.910        | 0.839       | 0.782        | 0.901        | 0.820       | 0.754        | 0.893        |
| <b>10</b>    | 0.627       | 0.557        | 0.706        | 0.590       | 0.511        | 0.681        | 0.551       | 0.462        | 0.656        | 0.509       | 0.412        | 0.630        | 0.466       | 0.361        | 0.603        | 0.422       | 0.310        | 0.575        |
| <b>15</b>    | 0.261       | 0.187        | 0.364        | 0.219       | 0.146        | 0.329        | 0.180       | 0.109        | 0.295        | 0.144       | 0.079        | 0.263        | 0.112       | 0.054        | 0.232        | 0.084       | 0.035        | 0.203        |
| <b>20</b>    | 0.041       | 0.018        | 0.094        | 0.027       | 0.010        | 0.074        | 0.017       | 0.005        | 0.058        | 0.010       | 0.002        | 0.044        | 0.005       | 0.001        | 0.033        | 0.003       | 0.000        | 0.024        |
| <b>25</b>    | 0.004       | 0.001        | 0.018        | 0.002       | 0.000        | 0.012        | 0.001       | 0.000        | 0.008        | 0.000       | 0.000        | 0.005        | 0.000       | 0.000        | 0.003        | 0.000       | 0.000        | 0.002        |
| <b>CAG</b>   | <b>57*</b>  |              |              | <b>58*</b>  |              |              | <b>59*</b>  |              |              |             |              |              |             |              |              |             |              |              |
| <b>years</b> | <i>surv</i> | <i>lower</i> | <i>upper</i> | <i>surv</i> | <i>lower</i> | <i>upper</i> | <i>surv</i> | <i>lower</i> | <i>upper</i> |             |              |              |             |              |              |             |              |              |
| <b>5</b>     | 0.800       | 0.724        | 0.883        | 0.777       | 0.690        | 0.873        | 0.751       | 0.654        | 0.863        |             |              |              |             |              |              |             |              |              |
| <b>10</b>    | 0.377       | 0.260        | 0.547        | 0.332       | 0.213        | 0.519        | 0.288       | 0.169        | 0.491        |             |              |              |             |              |              |             |              |              |
| <b>15</b>    | 0.061       | 0.021        | 0.177        | 0.042       | 0.012        | 0.152        | 0.028       | 0.006        | 0.130        |             |              |              |             |              |              |             |              |              |
| <b>20</b>    | 0.001       | 0.000        | 0.018        | 0.001       | 0.000        | 0.012        | 0.000       | 0.000        | 0.009        |             |              |              |             |              |              |             |              |              |
| <b>25</b>    | 0.000       | 0.000        | 0.001        | 0.000       | 0.000        | 0.001        | 0.000       | 0.000        | 0.000        |             |              |              |             |              |              |             |              |              |

Data is plotted in Figure 1 of the main article. *surv* = survival rate, *lower* = lower 95% confidence bound, *upper* = upper 95% confidence bound.

\* CAG length represents less than 1% of those onset HD onset in this age range. Estimate for this CAG length is an extrapolation from the survival model.



Supplemental Table 7. Survival curve estimates by CAG length for men with HD onset at age 25

| <b>CAG</b>   | <b>39*</b>  |              |              | <b>40*</b>  |              |              | <b>41</b>   |              |              | <b>42</b>   |              |              | <b>43</b>   |              |              | <b>44</b>   |              |              |
|--------------|-------------|--------------|--------------|-------------|--------------|--------------|-------------|--------------|--------------|-------------|--------------|--------------|-------------|--------------|--------------|-------------|--------------|--------------|
| <b>years</b> | <i>surv</i> | <i>lower</i> | <i>upper</i> |
| <b>5</b>     | 0.982       | 0.974        | 0.990        | 0.981       | 0.973        | 0.989        | 0.979       | 0.971        | 0.988        | 0.977       | 0.969        | 0.986        | 0.975       | 0.966        | 0.985        | 0.973       | 0.964        | 0.983        |
| <b>10</b>    | 0.925       | 0.898        | 0.952        | 0.919       | 0.891        | 0.947        | 0.912       | 0.884        | 0.941        | 0.905       | 0.877        | 0.934        | 0.897       | 0.869        | 0.927        | 0.889       | 0.860        | 0.920        |
| <b>15</b>    | 0.798       | 0.737        | 0.865        | 0.783       | 0.721        | 0.850        | 0.767       | 0.706        | 0.835        | 0.751       | 0.689        | 0.818        | 0.733       | 0.671        | 0.800        | 0.714       | 0.653        | 0.780        |
| <b>20</b>    | 0.585       | 0.487        | 0.704        | 0.559       | 0.463        | 0.676        | 0.533       | 0.440        | 0.646        | 0.506       | 0.416        | 0.615        | 0.477       | 0.391        | 0.583        | 0.449       | 0.366        | 0.550        |
| <b>25</b>    | 0.392       | 0.285        | 0.540        | 0.363       | 0.261        | 0.503        | 0.333       | 0.238        | 0.465        | 0.304       | 0.216        | 0.427        | 0.275       | 0.194        | 0.390        | 0.247       | 0.173        | 0.352        |
| <b>CAG</b>   | <b>45</b>   |              |              | <b>46</b>   |              |              | <b>47</b>   |              |              | <b>48</b>   |              |              | <b>49</b>   |              |              | <b>50</b>   |              |              |
| <b>years</b> | <i>surv</i> | <i>lower</i> | <i>upper</i> |
| <b>5</b>     | 0.971       | 0.961        | 0.981        | 0.969       | 0.958        | 0.980        | 0.966       | 0.955        | 0.978        | 0.964       | 0.952        | 0.975        | 0.961       | 0.948        | 0.973        | 0.957       | 0.944        | 0.971        |
| <b>10</b>    | 0.881       | 0.851        | 0.911        | 0.871       | 0.841        | 0.903        | 0.861       | 0.831        | 0.893        | 0.851       | 0.819        | 0.883        | 0.839       | 0.807        | 0.873        | 0.827       | 0.794        | 0.862        |
| <b>15</b>    | 0.694       | 0.634        | 0.760        | 0.673       | 0.614        | 0.738        | 0.651       | 0.592        | 0.716        | 0.628       | 0.570        | 0.692        | 0.604       | 0.546        | 0.668        | 0.579       | 0.521        | 0.644        |
| <b>20</b>    | 0.420       | 0.341        | 0.516        | 0.390       | 0.316        | 0.482        | 0.361       | 0.290        | 0.448        | 0.331       | 0.264        | 0.415        | 0.302       | 0.239        | 0.382        | 0.273       | 0.213        | 0.350        |
| <b>25</b>    | 0.219       | 0.152        | 0.316        | 0.193       | 0.133        | 0.281        | 0.168       | 0.114        | 0.248        | 0.145       | 0.097        | 0.217        | 0.123       | 0.081        | 0.189        | 0.104       | 0.066        | 0.163        |
| <b>CAG</b>   | <b>51</b>   |              |              | <b>52</b>   |              |              | <b>53</b>   |              |              | <b>54</b>   |              |              | <b>55</b>   |              |              | <b>56</b>   |              |              |
| <b>years</b> | <i>surv</i> | <i>lower</i> | <i>upper</i> | <i>surv</i> | <i>lower</i> | <i>upper</i> | <i>surv</i> | <i>lower</i> | <i>upper</i> | <i>surv</i> | <i>upper</i> | <i>upper</i> | <i>surv</i> | <i>upper</i> | <i>upper</i> | <i>surv</i> | <i>upper</i> | <i>upper</i> |
| <b>5</b>     | 0.954       | 0.940        | 0.968        | 0.950       | 0.935        | 0.965        | 0.946       | 0.930        | 0.963        | 0.942       | 0.924        | 0.960        | 0.937       | 0.918        | 0.957        | 0.932       | 0.911        | 0.954        |
| <b>10</b>    | 0.814       | 0.779        | 0.850        | 0.800       | 0.763        | 0.838        | 0.785       | 0.746        | 0.826        | 0.769       | 0.727        | 0.814        | 0.753       | 0.707        | 0.801        | 0.735       | 0.685        | 0.789        |
| <b>15</b>    | 0.553       | 0.494        | 0.619        | 0.527       | 0.466        | 0.595        | 0.499       | 0.437        | 0.570        | 0.471       | 0.406        | 0.546        | 0.442       | 0.374        | 0.522        | 0.413       | 0.342        | 0.499        |
| <b>20</b>    | 0.245       | 0.188        | 0.320        | 0.218       | 0.163        | 0.291        | 0.192       | 0.139        | 0.264        | 0.167       | 0.116        | 0.239        | 0.144       | 0.096        | 0.216        | 0.122       | 0.077        | 0.194        |
| <b>25</b>    | 0.086       | 0.052        | 0.140        | 0.070       | 0.041        | 0.119        | 0.056       | 0.031        | 0.101        | 0.044       | 0.022        | 0.086        | 0.034       | 0.016        | 0.072        | 0.025       | 0.011        | 0.060        |
| <b>CAG</b>   | <b>57</b>   |              |              | <b>58</b>   |              |              | <b>59</b>   |              |              |             |              |              |             |              |              |             |              |              |
| <b>years</b> | <i>surv</i> | <i>lower</i> | <i>upper</i> | <i>surv</i> | <i>lower</i> | <i>upper</i> | <i>surv</i> | <i>lower</i> | <i>upper</i> |             |              |              |             |              |              |             |              |              |
| <b>5</b>     | 0.926       | 0.903        | 0.950        | 0.920       | 0.895        | 0.947        | 0.914       | 0.885        | 0.944        |             |              |              |             |              |              |             |              |              |
| <b>10</b>    | 0.716       | 0.661        | 0.776        | 0.697       | 0.636        | 0.763        | 0.676       | 0.609        | 0.750        |             |              |              |             |              |              |             |              |              |
| <b>15</b>    | 0.383       | 0.309        | 0.476        | 0.354       | 0.276        | 0.454        | 0.324       | 0.243        | 0.432        |             |              |              |             |              |              |             |              |              |
| <b>20</b>    | 0.102       | 0.060        | 0.175        | 0.085       | 0.046        | 0.156        | 0.069       | 0.034        | 0.140        |             |              |              |             |              |              |             |              |              |
| <b>25</b>    | 0.019       | 0.007        | 0.050        | 0.013       | 0.004        | 0.042        | 0.009       | 0.003        | 0.034        |             |              |              |             |              |              |             |              |              |

Data is plotted in Figure 2 of the main article. *surv* = survival rate, *lower* = lower 95% confidence bound, *upper* = upper 95% confidence bound.

\* CAG length represents less than 1% of those onset HD onset in this age range. Estimate for this CAG length is an extrapolation from the survival model.

Supplemental Table 8. Survival curve estimates by CAG length for men with HD onset at age 35

| <b>CAG</b>   | <b>39*</b>  |              |              | <b>40*</b>  |              |              | <b>41</b>   |              |              | <b>42</b>   |              |              | <b>43</b>   |              |              | <b>44</b>   |              |              |
|--------------|-------------|--------------|--------------|-------------|--------------|--------------|-------------|--------------|--------------|-------------|--------------|--------------|-------------|--------------|--------------|-------------|--------------|--------------|
| <b>years</b> | <i>surv</i> | <i>lower</i> | <i>upper</i> |
| <b>5</b>     | 0.968       | 0.958        | 0.979        | 0.965       | 0.955        | 0.977        | 0.963       | 0.951        | 0.974        | 0.960       | 0.948        | 0.972        | 0.956       | 0.944        | 0.969        | 0.953       | 0.939        | 0.966        |
| <b>10</b>    | 0.868       | 0.838        | 0.899        | 0.858       | 0.828        | 0.889        | 0.847       | 0.817        | 0.878        | 0.835       | 0.806        | 0.866        | 0.823       | 0.793        | 0.854        | 0.810       | 0.779        | 0.841        |
| <b>15</b>    | 0.666       | 0.608        | 0.731        | 0.644       | 0.587        | 0.706        | 0.621       | 0.566        | 0.681        | 0.596       | 0.543        | 0.654        | 0.571       | 0.520        | 0.627        | 0.545       | 0.495        | 0.600        |
| <b>20</b>    | 0.381       | 0.309        | 0.470        | 0.351       | 0.285        | 0.433        | 0.322       | 0.260        | 0.397        | 0.293       | 0.236        | 0.362        | 0.264       | 0.212        | 0.328        | 0.236       | 0.189        | 0.296        |
| <b>25</b>    | 0.185       | 0.128        | 0.268        | 0.161       | 0.111        | 0.234        | 0.138       | 0.094        | 0.202        | 0.117       | 0.079        | 0.172        | 0.098       | 0.065        | 0.146        | 0.080       | 0.053        | 0.122        |
| <b>CAG</b>   | <b>45</b>   |              |              | <b>46</b>   |              |              | <b>47</b>   |              |              | <b>48</b>   |              |              | <b>49</b>   |              |              | <b>50</b>   |              |              |
| <b>years</b> | <i>surv</i> | <i>lower</i> | <i>upper</i> |
| <b>5</b>     | 0.949       | 0.935        | 0.963        | 0.945       | 0.929        | 0.960        | 0.940       | 0.924        | 0.957        | 0.935       | 0.918        | 0.953        | 0.930       | 0.911        | 0.950        | 0.924       | 0.903        | 0.949        |
| <b>10</b>    | 0.795       | 0.764        | 0.828        | 0.780       | 0.748        | 0.814        | 0.764       | 0.730        | 0.800        | 0.747       | 0.710        | 0.786        | 0.729       | 0.689        | 0.772        | 0.710       | 0.666        | 0.795        |
| <b>15</b>    | 0.518       | 0.469        | 0.572        | 0.490       | 0.441        | 0.545        | 0.462       | 0.411        | 0.518        | 0.433       | 0.380        | 0.492        | 0.403       | 0.348        | 0.467        | 0.374       | 0.315        | 0.518        |
| <b>20</b>    | 0.209       | 0.165        | 0.265        | 0.184       | 0.142        | 0.237        | 0.159       | 0.120        | 0.211        | 0.137       | 0.099        | 0.188        | 0.116       | 0.080        | 0.167        | 0.096       | 0.063        | 0.209        |
| <b>25</b>    | 0.065       | 0.041        | 0.102        | 0.052       | 0.032        | 0.084        | 0.040       | 0.023        | 0.070        | 0.031       | 0.017        | 0.057        | 0.023       | 0.011        | 0.047        | 0.017       | 0.007        | 0.065        |
| <b>CAG</b>   | <b>51</b>   |              |              | <b>52</b>   |              |              | <b>53*</b>  |              |              | <b>54*</b>  |              |              | <b>55*</b>  |              |              | <b>56*</b>  |              |              |
| <b>years</b> | <i>surv</i> | <i>lower</i> | <i>upper</i> | <i>surv</i> | <i>lower</i> | <i>upper</i> | <i>surv</i> | <i>lower</i> | <i>upper</i> | <i>surv</i> | <i>upper</i> | <i>upper</i> | <i>surv</i> | <i>upper</i> | <i>upper</i> | <i>surv</i> | <i>upper</i> | <i>upper</i> |
| <b>5</b>     | 0.946       | 0.918        | 0.895        | 0.942       | 0.912        | 0.886        | 0.939       | 0.905        | 0.876        | 0.935       | 0.897        | 0.865        | 0.930       | 0.889        | 0.854        | 0.926       | 0.881        | 0.841        |
| <b>10</b>    | 0.757       | 0.690        | 0.641        | 0.743       | 0.669        | 0.614        | 0.729       | 0.647        | 0.586        | 0.714       | 0.624        | 0.556        | 0.700       | 0.600        | 0.525        | 0.685       | 0.574        | 0.492        |
| <b>15</b>    | 0.443       | 0.344        | 0.282        | 0.420       | 0.315        | 0.250        | 0.397       | 0.286        | 0.218        | 0.375       | 0.257        | 0.187        | 0.354       | 0.230        | 0.158        | 0.334       | 0.203        | 0.131        |
| <b>20</b>    | 0.148       | 0.079        | 0.048        | 0.131       | 0.064        | 0.036        | 0.115       | 0.051        | 0.026        | 0.101       | 0.040        | 0.018        | 0.089       | 0.030        | 0.012        | 0.077       | 0.023        | 0.008        |
| <b>25</b>    | 0.038       | 0.012        | 0.005        | 0.031       | 0.008        | 0.003        | 0.025       | 0.006        | 0.002        | 0.020       | 0.004        | 0.001        | 0.016       | 0.002        | 0.000        | 0.013       | 0.001        | 0.000        |
| <b>CAG</b>   | <b>57*</b>  |              |              | <b>58*</b>  |              |              | <b>59*</b>  |              |              |             |              |              |             |              |              |             |              |              |
| <b>years</b> | <i>surv</i> | <i>lower</i> | <i>upper</i> | <i>surv</i> | <i>lower</i> | <i>upper</i> | <i>surv</i> | <i>lower</i> | <i>upper</i> |             |              |              |             |              |              |             |              |              |
| <b>5</b>     | 0.871       | 0.827        | 0.918        | 0.861       | 0.812        | 0.913        | 0.850       | 0.796        | 0.909        |             |              |              |             |              |              |             |              |              |
| <b>10</b>    | 0.548       | 0.458        | 0.656        | 0.521       | 0.424        | 0.641        | 0.494       | 0.389        | 0.627        |             |              |              |             |              |              |             |              |              |
| <b>15</b>    | 0.178       | 0.107        | 0.295        | 0.154       | 0.085        | 0.277        | 0.131       | 0.067        | 0.260        |             |              |              |             |              |              |             |              |              |
| <b>20</b>    | 0.016       | 0.005        | 0.058        | 0.012       | 0.003        | 0.050        | 0.008       | 0.001        | 0.043        |             |              |              |             |              |              |             |              |              |
| <b>25</b>    | 0.001       | 0.000        | 0.008        | 0.000       | 0.000        | 0.006        | 0.000       | 0.000        | 0.005        |             |              |              |             |              |              |             |              |              |

Data is plotted in Figure 2 of the main article. *surv* = survival rate, *lower* = lower 95% confidence bound, *upper* = upper 95% confidence bound.

\* CAG length represents less than 1% of those onset HD onset in this age range. Estimate for this CAG length is an extrapolation from the survival model.

Supplemental Table 9. Survival curve estimates by CAG length for men with HD onset at age 45

| <b>CAG</b>   | <b>39*</b>  |              |              | <b>40</b>   |              |              | <b>41</b>   |              |              | <b>42</b>   |              |              | <b>43</b>   |              |              | <b>44</b>   |              |              |
|--------------|-------------|--------------|--------------|-------------|--------------|--------------|-------------|--------------|--------------|-------------|--------------|--------------|-------------|--------------|--------------|-------------|--------------|--------------|
| <b>years</b> | <i>surv</i> | <i>lower</i> | <i>upper</i> |
| <b>5</b>     | 0.963       | 0.952        | 0.974        | 0.960       | 0.949        | 0.972        | 0.957       | 0.945        | 0.969        | 0.953       | 0.941        | 0.966        | 0.950       | 0.936        | 0.963        | 0.946       | 0.931        | 0.960        |
| <b>10</b>    | 0.849       | 0.823        | 0.877        | 0.838       | 0.812        | 0.865        | 0.826       | 0.799        | 0.853        | 0.812       | 0.786        | 0.840        | 0.798       | 0.771        | 0.827        | 0.784       | 0.755        | 0.813        |
| <b>15</b>    | 0.626       | 0.578        | 0.677        | 0.601       | 0.556        | 0.650        | 0.576       | 0.533        | 0.623        | 0.550       | 0.509        | 0.596        | 0.524       | 0.482        | 0.568        | 0.496       | 0.454        | 0.541        |
| <b>20</b>    | 0.328       | 0.274        | 0.392        | 0.299       | 0.250        | 0.357        | 0.270       | 0.226        | 0.323        | 0.242       | 0.201        | 0.291        | 0.215       | 0.177        | 0.261        | 0.189       | 0.153        | 0.234        |
| <b>25</b>    | 0.143       | 0.102        | 0.198        | 0.121       | 0.087        | 0.169        | 0.101       | 0.072        | 0.143        | 0.084       | 0.058        | 0.120        | 0.068       | 0.046        | 0.100        | 0.054       | 0.035        | 0.084        |
| <b>CAG</b>   | <b>45</b>   |              |              | <b>46</b>   |              |              | <b>47</b>   |              |              | <b>48</b>   |              |              | <b>49*</b>  |              |              | <b>50*</b>  |              |              |
| <b>years</b> | <i>surv</i> | <i>lower</i> | <i>upper</i> |
| <b>5</b>     | 0.941       | 0.925        | 0.957        | 0.936       | 0.919        | 0.954        | 0.931       | 0.913        | 0.950        | 0.926       | 0.905        | 0.947        | 0.920       | 0.897        | 0.943        | 0.913       | 0.888        | 0.939        |
| <b>10</b>    | 0.768       | 0.737        | 0.799        | 0.751       | 0.718        | 0.785        | 0.733       | 0.696        | 0.772        | 0.714       | 0.673        | 0.758        | 0.694       | 0.648        | 0.744        | 0.673       | 0.621        | 0.730        |
| <b>15</b>    | 0.468       | 0.424        | 0.515        | 0.439       | 0.393        | 0.491        | 0.410       | 0.359        | 0.467        | 0.380       | 0.326        | 0.443        | 0.350       | 0.292        | 0.421        | 0.321       | 0.258        | 0.399        |
| <b>20</b>    | 0.164       | 0.129        | 0.209        | 0.141       | 0.107        | 0.187        | 0.120       | 0.086        | 0.167        | 0.100       | 0.068        | 0.148        | 0.083       | 0.052        | 0.132        | 0.067       | 0.039        | 0.117        |
| <b>25</b>    | 0.043       | 0.026        | 0.069        | 0.033       | 0.019        | 0.057        | 0.025       | 0.013        | 0.047        | 0.018       | 0.008        | 0.039        | 0.013       | 0.005        | 0.032        | 0.009       | 0.003        | 0.026        |
| <b>CAG</b>   | <b>51*</b>  |              |              | <b>52*</b>  |              |              | <b>53*</b>  |              |              | <b>54*</b>  |              |              | <b>55*</b>  |              |              | <b>56*</b>  |              |              |
| <b>years</b> | <i>surv</i> | <i>lower</i> | <i>upper</i> | <i>surv</i> | <i>lower</i> | <i>upper</i> | <i>surv</i> | <i>lower</i> | <i>upper</i> | <i>surv</i> | <i>upper</i> | <i>upper</i> | <i>surv</i> | <i>upper</i> | <i>upper</i> | <i>surv</i> | <i>upper</i> | <i>upper</i> |
| <b>5</b>     | 0.906       | 0.878        | 0.935        | 0.899       | 0.868        | 0.931        | 0.891       | 0.856        | 0.927        | 0.882       | 0.843        | 0.923        | 0.873       | 0.830        | 0.919        | 0.863       | 0.815        | 0.915        |
| <b>10</b>    | 0.652       | 0.593        | 0.716        | 0.629       | 0.563        | 0.702        | 0.605       | 0.531        | 0.688        | 0.580       | 0.498        | 0.674        | 0.554       | 0.465        | 0.660        | 0.527       | 0.430        | 0.646        |
| <b>15</b>    | 0.292       | 0.225        | 0.378        | 0.263       | 0.194        | 0.358        | 0.235       | 0.164        | 0.338        | 0.209       | 0.136        | 0.319        | 0.183       | 0.111        | 0.301        | 0.159       | 0.089        | 0.283        |
| <b>20</b>    | 0.054       | 0.028        | 0.103        | 0.042       | 0.019        | 0.091        | 0.032       | 0.013        | 0.080        | 0.024       | 0.008        | 0.070        | 0.018       | 0.005        | 0.061        | 0.013       | 0.003        | 0.053        |
| <b>25</b>    | 0.006       | 0.002        | 0.021        | 0.004       | 0.001        | 0.017        | 0.002       | 0.000        | 0.013        | 0.001       | 0.000        | 0.011        | 0.001       | 0.000        | 0.009        | 0.000       | 0.000        | 0.007        |
| <b>CAG</b>   | <b>57*</b>  |              |              | <b>58*</b>  |              |              | <b>59*</b>  |              |              |             |              |              |             |              |              |             |              |              |
| <b>years</b> | <i>surv</i> | <i>lower</i> | <i>upper</i> | <i>surv</i> | <i>lower</i> | <i>upper</i> | <i>surv</i> | <i>lower</i> | <i>upper</i> |             |              |              |             |              |              |             |              |              |
| <b>5</b>     | 0.853       | 0.799        | 0.910        | 0.841       | 0.782        | 0.906        | 0.829       | 0.763        | 0.902        |             |              |              |             |              |              |             |              |              |
| <b>10</b>    | 0.500       | 0.395        | 0.632        | 0.471       | 0.360        | 0.618        | 0.443       | 0.324        | 0.604        |             |              |              |             |              |              |             |              |              |
| <b>15</b>    | 0.136       | 0.070        | 0.266        | 0.115       | 0.053        | 0.249        | 0.096       | 0.039        | 0.234        |             |              |              |             |              |              |             |              |              |
| <b>20</b>    | 0.009       | 0.002        | 0.046        | 0.006       | 0.001        | 0.040        | 0.004       | 0.000        | 0.034        |             |              |              |             |              |              |             |              |              |
| <b>25</b>    | 0.000       | 0.000        | 0.005        | 0.000       | 0.000        | 0.004        | 0.000       | 0.000        | 0.003        |             |              |              |             |              |              |             |              |              |

Data is plotted in Figure 2 of the main article. *surv* = survival rate, *lower* = lower 95% confidence bound, *upper* = upper 95% confidence bound.

\* CAG length represents less than 1% of those onset HD onset in this age range. Estimate for this CAG length is an extrapolation from the survival model.

Supplemental Table 10. Survival curve estimates by CAG length for men with HD onset at age 55

| <b>CAG</b>   | <b>39</b>   |              |              | <b>40</b>   |              |              | <b>41</b>   |              |              | <b>42</b>   |              |              | <b>43</b>   |              |              | <b>44</b>   |              |              |
|--------------|-------------|--------------|--------------|-------------|--------------|--------------|-------------|--------------|--------------|-------------|--------------|--------------|-------------|--------------|--------------|-------------|--------------|--------------|
| <b>years</b> | <i>surv</i> | <i>lower</i> | <i>upper</i> |
| <b>5</b>     | 0.954       | 0.940        | 0.968        | 0.950       | 0.936        | 0.965        | 0.946       | 0.931        | 0.962        | 0.942       | 0.926        | 0.958        | 0.937       | 0.920        | 0.955        | 0.932       | 0.913        | 0.951        |
| <b>10</b>    | 0.814       | 0.782        | 0.848        | 0.801       | 0.769        | 0.834        | 0.786       | 0.753        | 0.819        | 0.770       | 0.737        | 0.805        | 0.753       | 0.719        | 0.789        | 0.736       | 0.700        | 0.774        |
| <b>15</b>    | 0.554       | 0.501        | 0.613        | 0.528       | 0.476        | 0.584        | 0.500       | 0.451        | 0.555        | 0.472       | 0.424        | 0.526        | 0.443       | 0.395        | 0.497        | 0.414       | 0.365        | 0.469        |
| <b>20</b>    | 0.246       | 0.195        | 0.311        | 0.219       | 0.172        | 0.278        | 0.193       | 0.150        | 0.246        | 0.168       | 0.129        | 0.218        | 0.144       | 0.109        | 0.192        | 0.123       | 0.090        | 0.168        |
| <b>25</b>    | 0.086       | 0.056        | 0.134        | 0.070       | 0.045        | 0.111        | 0.056       | 0.035        | 0.091        | 0.044       | 0.026        | 0.074        | 0.034       | 0.019        | 0.060        | 0.026       | 0.014        | 0.048        |
| <b>CAG</b>   | <b>45</b>   |              |              | <b>46*</b>  |              |              | <b>47*</b>  |              |              | <b>48*</b>  |              |              | <b>49*</b>  |              |              | <b>50*</b>  |              |              |
| <b>years</b> | <i>surv</i> | <i>lower</i> | <i>upper</i> |
| <b>5</b>     | 0.927       | 0.906        | 0.947        | 0.921       | 0.899        | 0.943        | 0.914       | 0.890        | 0.939        | 0.907       | 0.881        | 0.935        | 0.900       | 0.871        | 0.930        | 0.892       | 0.860        | 0.926        |
| <b>10</b>    | 0.717       | 0.678        | 0.758        | 0.697       | 0.655        | 0.743        | 0.677       | 0.630        | 0.727        | 0.655       | 0.603        | 0.711        | 0.632       | 0.574        | 0.696        | 0.608       | 0.544        | 0.680        |
| <b>15</b>    | 0.384       | 0.334        | 0.443        | 0.355       | 0.302        | 0.417        | 0.325       | 0.269        | 0.393        | 0.296       | 0.237        | 0.370        | 0.267       | 0.206        | 0.347        | 0.239       | 0.176        | 0.326        |
| <b>20</b>    | 0.103       | 0.072        | 0.147        | 0.085       | 0.056        | 0.129        | 0.069       | 0.043        | 0.112        | 0.055       | 0.031        | 0.097        | 0.043       | 0.022        | 0.084        | 0.033       | 0.015        | 0.073        |
| <b>25</b>    | 0.019       | 0.009        | 0.038        | 0.014       | 0.006        | 0.031        | 0.009       | 0.004        | 0.024        | 0.006       | 0.002        | 0.019        | 0.004       | 0.001        | 0.015        | 0.003       | 0.001        | 0.012        |
| <b>CAG</b>   | <b>51*</b>  |              |              | <b>52*</b>  |              |              | <b>53*</b>  |              |              | <b>54*</b>  |              |              | <b>55*</b>  |              |              | <b>56*</b>  |              |              |
| <b>years</b> | <i>surv</i> | <i>lower</i> | <i>upper</i> | <i>surv</i> | <i>lower</i> | <i>upper</i> | <i>surv</i> | <i>lower</i> | <i>upper</i> | <i>surv</i> | <i>upper</i> | <i>upper</i> | <i>surv</i> | <i>upper</i> | <i>upper</i> | <i>surv</i> | <i>upper</i> | <i>upper</i> |
| <b>5</b>     | 0.884       | 0.848        | 0.921        | 0.875       | 0.835        | 0.916        | 0.865       | 0.820        | 0.912        | 0.854       | 0.805        | 0.907        | 0.843       | 0.788        | 0.902        | 0.831       | 0.770        | 0.897        |
| <b>10</b>    | 0.583       | 0.512        | 0.665        | 0.558       | 0.479        | 0.649        | 0.531       | 0.445        | 0.633        | 0.504       | 0.411        | 0.618        | 0.476       | 0.375        | 0.602        | 0.447       | 0.340        | 0.587        |
| <b>15</b>    | 0.212       | 0.148        | 0.305        | 0.187       | 0.122        | 0.285        | 0.162       | 0.099        | 0.266        | 0.139       | 0.078        | 0.248        | 0.118       | 0.060        | 0.231        | 0.099       | 0.045        | 0.215        |
| <b>20</b>    | 0.025       | 0.010        | 0.063        | 0.018       | 0.006        | 0.054        | 0.013       | 0.004        | 0.046        | 0.009       | 0.002        | 0.039        | 0.006       | 0.001        | 0.033        | 0.004       | 0.001        | 0.028        |
| <b>25</b>    | 0.002       | 0.000        | 0.009        | 0.001       | 0.000        | 0.007        | 0.001       | 0.000        | 0.005        | 0.000       | 0.000        | 0.004        | 0.000       | 0.000        | 0.003        | 0.000       | 0.000        | 0.002        |
| <b>CAG</b>   | <b>57*</b>  |              |              | <b>58*</b>  |              |              | <b>59*</b>  |              |              |             |              |              |             |              |              |             |              |              |
| <b>years</b> | <i>surv</i> | <i>lower</i> | <i>upper</i> | <i>surv</i> | <i>lower</i> | <i>upper</i> | <i>surv</i> | <i>lower</i> | <i>upper</i> |             |              |              |             |              |              |             |              |              |
| <b>5</b>     | 0.853       | 0.799        | 0.910        | 0.841       | 0.782        | 0.906        | 0.829       | 0.763        | 0.882        |             |              |              |             |              |              |             |              |              |
| <b>10</b>    | 0.500       | 0.395        | 0.632        | 0.471       | 0.360        | 0.618        | 0.443       | 0.324        | 0.541        |             |              |              |             |              |              |             |              |              |
| <b>15</b>    | 0.136       | 0.070        | 0.266        | 0.115       | 0.053        | 0.249        | 0.096       | 0.039        | 0.171        |             |              |              |             |              |              |             |              |              |
| <b>20</b>    | 0.009       | 0.002        | 0.046        | 0.006       | 0.001        | 0.040        | 0.004       | 0.000        | 0.017        |             |              |              |             |              |              |             |              |              |
| <b>25</b>    | 0.000       | 0.000        | 0.005        | 0.000       | 0.000        | 0.004        | 0.000       | 0.000        | 0.001        |             |              |              |             |              |              |             |              |              |

Data is plotted in Figure 2 of the main article. *surv* = survival rate, *lower* = lower 95% confidence bound, *upper* = upper 95% confidence bound.

\* CAG length represents less than 1% of those onset HD onset in this age range. Estimate for this CAG length is an extrapolation from the survival model.

Supplemental Table 11. Final Model in main paper

| Variable          | log HR  | S.E.   | z      | p val    | HR    | 95% CI |        |
|-------------------|---------|--------|--------|----------|-------|--------|--------|
| CAG (per repeat)  | 0.1227  | 0.0134 | 9.157  | 5.34E-20 | 1.131 | 1.101  | 1.161  |
| Age of HD Onset   | 0.0704  | 0.0124 | 5.677  | 1.37E-08 | 1.073 | 1.047  | 1.099  |
| Age of HD Onset'  | -0.1191 | 0.0265 | -4.494 | 6.99E-06 | 0.888 | 0.843  | 0.935  |
| Age of HD Onset'' | 0.5751  | 0.1113 | 5.167  | 2.38E-07 | 1.777 | 1.429  | 2.211  |
| Men vs Women      | 2.2965  | 0.5782 | 3.972  | 7.13E-05 | 9.939 | 3.200  | 30.868 |
| CAG by (M vs W)   | -0.0422 | 0.0127 | -3.323 | 8.91E-04 | 0.959 | 0.935  | 0.983  |

Abbreviations: *HR* = hazard ratio, *S.E* = standard error, *CI* = confidence interval, *p val* = p value, *M* = men, *W* = women. In p values, *XE-Y* indicates *X* times 10 to the *-Y* power (scientific notation). For age of HD onset, restricted cubic spline knots were placed at 23.05, 40.00, 50.00 and 65.00 years of age. *Age of HD Onset'* and *Age of HD Onset''* are the nonlinear restricted cubic spline coefficients for age of HD onset.

Supplemental Table 12. Model with 105 questionable cases of HD onset removed

| Variable          | log HR  | S.E.   | z      | p val   | HR    | 95% CI |        |
|-------------------|---------|--------|--------|---------|-------|--------|--------|
| CAG (per repeat)  | 0.124   | 0.0134 | 9.254  | <0.0001 | 1.132 | 1.103  | 1.162  |
| Age of HD Onset   | 0.0712  | 0.0122 | 5.836  | <0.0001 | 1.074 | 1.048  | 1.100  |
| Age of HD Onset'  | -0.1276 | 0.0278 | -4.590 | <0.0001 | 0.880 | 0.834  | 0.929  |
| Age of HD Onset'' | 0.5777  | 0.1107 | 5.219  | <0.0001 | 1.782 | 1.434  | 2.214  |
| Men vs Women      | 2.2935  | 0.5775 | 3.971  | <0.0001 | 9.910 | 3.195  | 30.733 |
| CAG by (M vs W)   | -0.0421 | 0.0127 | -3.315 | 0.0009  | 0.959 | 0.935  | 0.983  |

Abbreviations: *HR* = hazard ratio, *S.E* = standard error, *CI* = confidence interval, *p val* = p value, *M* = men, *W* = women. For age of HD onset, restricted cubic spline knots were placed at 23.05, 40.00, 50.00 and 65.00 years of age. *Age of HD Onset'* and *Age of HD Onset''* are the nonlinear restricted cubic spline coefficients for age of HD onset.

Supplemental Table 13, Model with data restricted to CAG lengths 41 through 56

| Variable          | log HR  | S.E.   | z      | p val   | HR    | 95% CI |        |
|-------------------|---------|--------|--------|---------|-------|--------|--------|
| CAG (per repeat)  | 0.1292  | 0.0218 | 5.927  | <0.0001 | 1.138 | 1.090  | 1.188  |
| Age of HD Onset   | 0.0648  | 0.0109 | 5.945  | <0.0001 | 1.067 | 1.044  | 1.090  |
| Age of HD Onset'  | -0.1011 | 0.0457 | -2.212 | 0.0268  | 0.904 | 0.826  | 0.989  |
| Age of HD Onset'' | 0.395   | 0.1695 | 2.330  | 0.0198  | 1.484 | 1.065  | 2.069  |
| Men vs Women      | 2.1869  | 0.9854 | 2.219  | 0.0268  | 8.908 | 1.291  | 61.448 |
| CAG by (M vs W)   | -0.0391 | 0.0218 | -1.794 | 0.0733  | 0.962 | 0.921  | 1.004  |

Abbreviations: *HR* = hazard ratio, *S.E* = standard error, *CI* = confidence interval, *p val* = p value, *M* = men, *W* = women. In p values, *XE-Y* indicates *X* times 10 to the *-Y* power (scientific notation). For age of HD onset, restricted cubic spline knots were placed at 23.05, 40.00, 50.00 and 65.00 years of age. *Age of HD Onset'* and *Age of HD Onset''* are the nonlinear restricted cubic spline coefficients for age of HD onset.

Supplemental Table 14. Model controlling for (non-significant) effect of CAG length on the short allele

| Variable                      | log HR  | S.E.   | z      | p val    | HR     | 95% CI |        |
|-------------------------------|---------|--------|--------|----------|--------|--------|--------|
| CAG (per repeat)              | 0.1272  | 0.0142 | 8.958  | <0.0001  | 1.136  | 1.104  | 1.168  |
| Age of HD Onset               | 0.0764  | 0.0135 | 5.659  | <0.0001  | 1.079  | 1.051  | 1.108  |
| Age of HD Onset'              | -0.1261 | 0.0288 | -4.378 | <0.0001  | 0.882  | 0.833  | 0.933  |
| Age of HD Onset''             | 0.5912  | 0.1205 | 4.906  | <0.0001  | 1.806  | 1.426  | 2.287  |
| Men vs Women                  | 2.3517  | 0.6148 | 3.825  | 1.00E-04 | 10.503 | 3.148  | 35.045 |
| CAG by (M vs W)               | -0.0426 | 0.0135 | -3.156 | 1.60E-03 | 0.958  | 0.933  | 0.984  |
| CAG short allele (per repeat) | 0.0091  | 0.0104 | 0.875  | 3.78E-01 | 1.009  | 0.989  | 1.030  |

Abbreviations: *HR* = hazard ratio, *S.E* = standard error, *CI* = confidence interval, *p val* = p value, *M* = men, *W* = women. In p values, *XE-Y* indicates *X* times 10 to the *-Y* power (scientific notation). For age of HD onset, restricted cubic spline knots were placed at 23.05, 40.00, 50.00 and 65.00 years of age. *Age of HD Onset'* and *Age of HD Onset''* are the nonlinear restricted cubic spline coefficients for age of HD onset.

Supplemental Table 15. Model controlling for data subset within Registry HD

| Variable               | log HR  | S.E.   | z      | p val   | HR    | 95% CI |        |
|------------------------|---------|--------|--------|---------|-------|--------|--------|
| CAG (per repeat)       | 0.1078  | 0.0137 | 7.869  | <0.0001 | 1.114 | 1.084  | 1.144  |
| Age of HD Onset        | 0.0639  | 0.0124 | 5.153  | <0.0001 | 1.066 | 1.040  | 1.092  |
| Age of HD Onset'       | -0.0954 | 0.0263 | -3.627 | 0.0003  | 0.909 | 0.863  | 0.957  |
| Age of HD Onset''      | 0.4791  | 0.1114 | 4.301  | <0.0001 | 1.615 | 1.298  | 2.009  |
| Men vs Women           | 1.9171  | 0.5836 | 3.285  | 0.001   | 6.801 | 2.167  | 21.347 |
| CAG-by-(M vs W)        | -0.0348 | 0.0129 | -2.698 | 0.0068  | 0.966 | 0.942  | 0.991  |
| R3 vs R2 data source   | -0.9545 | 0.2566 | -3.720 | 0.0002  | 0.385 | 0.233  | 0.637  |
| Onset Age * (R3 vs R2) | -0.0041 | 0.0054 | -0.759 | 0.4496  | 0.996 | 0.985  | 1.007  |

Abbreviations: *HR* = hazard ratio, *S.E* = standard error, *CI* = confidence interval, *p val* = p value, *M* = men, *W* = women. In p values, *XE-Y* indicates *X* times 10 to the *-Y* power (scientific notation). For age of HD onset, restricted cubic spline knots were placed at 23.05, 40.00, 50.00 and 65.00 years of age. *Age of HD Onset'* and *Age of HD Onset''* are the nonlinear restricted cubic spline coefficients for age of HD onset. The exploratory variable of interest is the interaction between Onset Age and R3 vs R2 because the concern is that different methods for recording age of onset were used in these two subsets of registry-HD. In an additional model (not shown in a table) we tested the possible significance of an interaction of data source and all three onset age spline terms used to define the nonlinear details of the effect of onset age on survival. This interaction was not significant (Chi-Square = 1.31, 3df, p = .726.)

Supplemental Table 16. Model with Rater Estimate of Onset Age Used Throughout (Rather than Rater Age for Subset R2 and Motor Onset Age For R3)

| Variable          | log HR  | S.E.   | z      | p val   | HR    | 95% CI |        |
|-------------------|---------|--------|--------|---------|-------|--------|--------|
| CAG (per repeat)  | 0.0948  | 0.0143 | 6.629  | <0.0001 | 1.099 | 1.069  | 1.131  |
| Age of HD Onset   | 0.0478  | 0.013  | 3.677  | 0.0002  | 1.049 | 1.023  | 1.076  |
| Age of HD Onset'  | -0.0978 | 0.0293 | -3.338 | 0.0009  | 0.907 | 0.856  | 0.960  |
| Age of HD Onset'' | 0.4401  | 0.1075 | 4.094  | <0.0001 | 1.553 | 1.258  | 1.917  |
| Men vs Women      | 2.2104  | 0.6101 | 3.623  | 0.0003  | 9.119 | 2.758  | 30.148 |
| CAG-by-(M vs W)   | -0.0405 | 0.0134 | -3.022 | 0.0026  | 0.960 | 0.935  | 0.986  |

Abbreviations: *HR* = hazard ratio, *S.E* = standard error, *CI* = confidence interval, *p val* = p value, *M* = men, *W* = women. In p values, *XE-Y* indicates *X* times 10 to the *-Y* power (scientific notation). For age of HD onset, restricted cubic spline knots were placed at 23.05, 40.00, 50.00 and 65.00 years of age. Because the data were less complete, use of rater onset age rather than motor onset age reduced the sample to 804 deaths out of 7904 observations rather than 826 deaths in 8422 observations.

The two onset ages were are highly correlated. For the 6582 participants from R3 for whom both rater and motor ages were recorded, the Pearson correlation between the two was 0.949 and the standard deviation of the age differences was 3.976 years. The mean motor onset age was 1.17 years older that the rater-reported onset. The correlation between R2 rater onset and R3 motor onset ages was 0.962 among 807 overlapping participants with ages recorded in both data subsets. The standard deviation of the difference was 3.302 years.

Supplemental Table 17 Model with cluster effect for country in which data was collected

| Variable          | log HR  | S.E.   | z      | p val   | HR     | 95% CI |        |
|-------------------|---------|--------|--------|---------|--------|--------|--------|
| CAG (per repeat)  | 0.1247  | 0.0129 | 9.667  | <0.0001 | 1.133  | 1.105  | 1.162  |
| Age of HD Onset   | 0.0702  | 0.0071 | 9.887  | <0.0001 | 1.073  | 1.058  | 1.088  |
| Age of HD Onset'  | -0.1169 | 0.0211 | -5.540 | <0.0001 | 0.890  | 0.854  | 0.927  |
| Age of HD Onset'' | 0.5636  | 0.0952 | 5.920  | <0.0001 | 1.757  | 1.458  | 2.117  |
| Men vs Women      | 2.3912  | 0.4178 | 5.723  | <0.0001 | 10.927 | 4.818  | 24.780 |
| CAG by (M vs W)   | -0.0441 | 0.0088 | -5.011 | <0.0001 | 0.957  | 0.940  | 0.974  |

Abbreviations: *HR* = hazard ratio, *S.E* = standard error, *CI* = confidence interval, *p val* = p value, *M* = men, *W* = women. In p values, *XE-Y* indicates *X* times 10 to the *-Y* power (scientific notation). For age of HD onset, restricted cubic spline knots were placed at 23.05, 40.00, 50.00 and 65.00 years of age. *Age of HD Onset'* and *Age of HD Onset''* are the nonlinear restricted cubic spline coefficients for age of HD onset.



Supplemental Table 18. Model with cluster effect for site at which data was collected

| Variable          | log HR  | S.E.   | z      | p val   | HR     | 95% CI |        |
|-------------------|---------|--------|--------|---------|--------|--------|--------|
| CAG (per repeat)  | 0.1247  | 0.0109 | 11.440 | <0.0001 | 1.133  | 1.109  | 1.157  |
| Age of HD Onset   | 0.0702  | 0.0112 | 6.268  | <0.0001 | 1.073  | 1.049  | 1.097  |
| Age of HD Onset'  | -0.1168 | 0.0285 | -4.098 | <0.0001 | 0.890  | 0.841  | 0.941  |
| Age of HD Onset'' | 0.5634  | 0.1292 | 4.361  | <0.0001 | 1.757  | 1.364  | 2.263  |
| Men vs Women      | 2.3905  | 0.4638 | 5.154  | <0.0001 | 10.919 | 4.400  | 27.099 |
| CAG by (M vs W)   | -0.0441 | 0.0098 | -4.500 | <0.0001 | 0.957  | 0.939  | 0.975  |

Abbreviations: *HR* = hazard ratio, *S.E* = standard error, *CI* = confidence interval, *p val* = p value, *M* = men, *W* = women. In p values, *XE-Y* indicates *X* times 10 to the *-Y* power (scientific notation). For age of HD onset, restricted cubic spline knots were placed at 23.05, 40.00, 50.00 and 65.00 years of age. *Age of HD Onset'* and *Age of HD Onset''* are the nonlinear restricted cubic spline coefficients for age of HD onset.

Supplemental Table 19. Consistency of the effect of the estimated effect of CAG-length on Survival, Regardless of Model Adjustments.

| Table | Model                                               | Variable         | log HR | S.E.   | z     | p val   | HR    | 95% CI |       |
|-------|-----------------------------------------------------|------------------|--------|--------|-------|---------|-------|--------|-------|
| 2     | Final Model                                         | CAG (per repeat) | 0.1227 | 0.0134 | 9.157 | <0.0001 | 1.131 | 1.101  | 1.161 |
| 3     | 105 questionable cases removed                      | CAG (per repeat) | 0.1240 | 0.0134 | 9.254 | <0.0001 | 1.132 | 1.103  | 1.162 |
| 4     | CAG restricted to 41 to 56 range                    | CAG (per repeat) | 0.1292 | 0.0218 | 5.927 | <0.0001 | 1.138 | 1.090  | 1.188 |
| 5     | Adjust for short allele CAG length                  | CAG (per repeat) | 0.1272 | 0.0142 | 8.958 | <0.0001 | 1.136 | 1.104  | 1.168 |
| 6     | Adjust for Registry-HD data subset                  | CAG (per repeat) | 0.1078 | 0.0137 | 7.869 | <0.0001 | 1.114 | 1.084  | 1.144 |
| 7     | Rater's onset age used in both data subsets         | CAG (per repeat) | 0.0948 | 0.0143 | 6.629 | <0.0001 | 1.099 | 1.069  | 1.131 |
| 8     | Adjust significance for clustering within countries | CAG (per repeat) | 0.1247 | 0.0129 | 9.667 | <0.0001 | 1.133 | 1.105  | 1.162 |
| 9     | Adjust significance for clustering by study site    | CAG (per repeat) | 0.1247 | 0.0109 | 11.44 | <0.0001 | 1.133 | 1.109  | 1.157 |

Abbreviations: *HR* = hazard ratio, *S.E* = standard error, *CI* = confidence interval, *p val* = p value, *M* = men, *W* = women.

Supplemental Table 20. Consistency of the Interaction Effect of CAG Length and Sex on Survival, Regardless of Model Adjustments

| Table | Model                                               | Variable        | log HR  | S.E.   | z      | p val    | HR    | 95% CI |       |
|-------|-----------------------------------------------------|-----------------|---------|--------|--------|----------|-------|--------|-------|
| 2     | Final Model                                         | CAG by (M vs W) | -0.0422 | 0.0127 | -3.323 | 0.000891 | 0.959 | 0.935  | 0.983 |
| 3     | 105 questionable cases removed                      | CAG by (M vs W) | -0.0421 | 0.0127 | -3.315 | 0.0009   | 0.959 | 0.935  | 0.983 |
| 4     | CAG restricted to 41 to 56 range                    | CAG by (M vs W) | -0.0391 | 0.0218 | -1.794 | 0.0733   | 0.962 | 0.921  | 1.004 |
| 5     | Adjust for short allele CAG length                  | CAG by (M vs W) | -0.0426 | 0.0135 | -3.156 | 0.0016   | 0.958 | 0.933  | 0.984 |
| 6     | Adjust for Registry-HD data subset                  | CAG by (M vs W) | -0.0348 | 0.0129 | -2.698 | 0.0068   | 0.966 | 0.942  | 0.991 |
| 7     | Rater's onset age used in both data subsets         | CAG by (M vs W) | -0.0405 | 0.0134 | -3.022 | 0.0026   | 0.96  | 0.935  | 0.986 |
| 8     | Adjust significance for clustering within countries | CAG by (M vs W) | -0.0441 | 0.0088 | -5.011 | <0.0001  | 0.957 | 0.940  | 0.974 |
| 9     | Adjust significance for clustering by study site    | CAG by (M vs W) | -0.0441 | 0.0098 | -4.5   | <0.0001  | 0.957 | 0.939  | 0.975 |

Abbreviations: *HR* = hazard ratio, *S.E* = standard error, *CI* = confidence interval, *p val* = p value, *M* = men, *W* = women.

## Methods for simulating the effects of imprecise age of onset upon survival from onset.

The age of “onset” of Huntington’s disease, is vaguely defined. In many HD studies, including the R3 portion of Registry, estimates of onset age from more than one source are recorded. An implicit assumption in current and many other HD analyses is that this age of onset corresponds to a critical change in biological disease state that occurs at a more precise age. (Although progressive changes in many biological measures of HD are documented, the measures corresponding to this hypothetical biological state change have not been identified.)

Such measurement error effects are especially relevant to the current analysis because they represent more than a loss of precision in a predictor variable. There is a perfect negative correlation between error in the age of onset and error in the length of survival after onset, which is the outcome measure of interest. In the context of Cox proportional hazard modelling, this greatly complicates any attempt to assess measurement error impact by incorporating it into the underlying mathematical equations. We have thus turned to a simulation study to gain insight.

If we assume that the assumption of an underlying critical biological change is correct, then we can assess the effects of errors in the reported ages of onset relative to the age at which the biological change occurs. We do this by assuming that the ages of onset in our data are indeed the correct underlying ages. We then add random error to these ages repeatedly and record the consequent change in analysis results.

We estimate the standard deviation of reported age around true age using the differences between the variables “age of motor onset” and “rater estimate of onset age” within the R3 portion of the Registry data (Supplemental figure 2). Although the correlation between the two ages is 0.949, the standard deviation of the age differences is 3.98 years. If measurement error in the two reported ages were statistically independent and thus uncorrelated, then the standard deviation of reported ages around the true age would be  $3.98/\text{square-root}(2) = 2.81$  years. We used this as the standard deviation of normally distributed, measurement errors in the current simulation. We repeated the simulation 1000 times.

The simulation provides estimates of expected bias in the original log hazard ratio and statistical significance estimates. The ratio of the mean simulation parameters to those obtained from the original data is an estimate of the analogous ratio between the parameters from original data and the hypothetical underlying true onset ages. The adjusted parameter estimates are obtained by dividing the original log hazard and z values by these ratios. Results are summarized in supplemental table 20. In model 1, before including age of onset in the model, the estimated strength and significance of the main effect of CAG-Length increases slightly. Adding age-of-onset as a predictor (model 2), the simulation suggests that the effects of both CAG repeat length and age-of-onset as survival predictors are slight overestimates. However, the adjusted log hazard ratio CAG estimate (0.076 per CAG repeat) retains overwhelming statistical significance ( $p = 6.27 * 10^{-17}$ ). The same is true for the CAG estimate in model 3, where the influence of age of onset is modelled as a nonlinear spline and an interaction between CAG length and sex is also fit.

Figure S2. Correlation between motor onset age and rater’s estimate of onset age within the R3 Registry HD data.

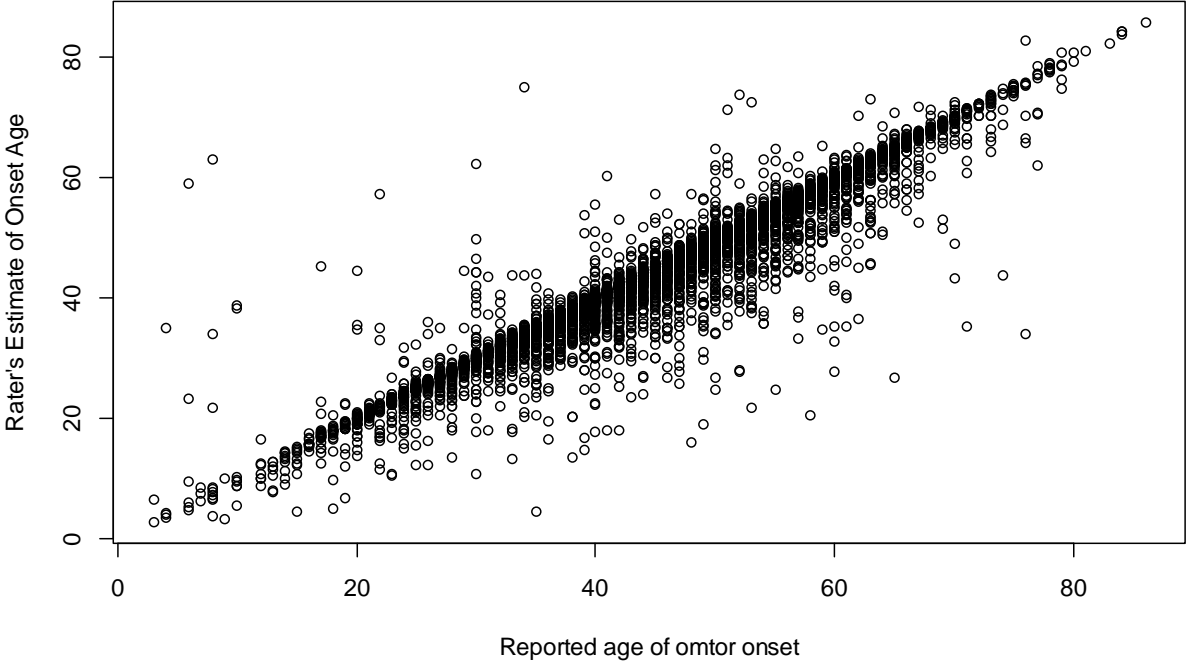

Supplemental Table 21. Comparison of measurement error simulation estimates to original model estimates.

| <b>Model 1</b>    | <b>Estimates</b> |          |              | <b>Simulation Ratios</b> |          | <b>Adjusted Estimates</b> |          |              |
|-------------------|------------------|----------|--------------|--------------------------|----------|---------------------------|----------|--------------|
| <b>Variable</b>   | <b>log HR</b>    | <b>z</b> | <b>p val</b> | <b>log HR</b>            | <b>Z</b> | <b>log HR</b>             | <b>z</b> | <b>p val</b> |
| CAG (per repeat)  | 0.022            | 3.195    | 1.40E-03     | 0.932                    | 0.934    | 0.024                     | 3.417    | 6.34E-04     |
| Men vs Women      | 0.359            | 5.066    | 4.07E-07     | 0.998                    | 0.996    | 0.359                     | 5.090    | 3.58E-07     |
| <b>Model 2</b>    |                  |          |              |                          |          |                           |          |              |
| <b>Variable</b>   | <b>log HR</b>    | <b>z</b> | <b>p val</b> | <b>log HR</b>            | <b>Z</b> | <b>log HR</b>             | <b>z</b> | <b>p val</b> |
| CAG (per repeat)  | 0.083            | 9.604    | 7.69E-22     | 1.099                    | 1.148    | 0.076                     | 8.363    | 6.27E-17     |
| Men vs Women      | 0.369            | 5.201    | 1.98E-07     | 0.991                    | 0.989    | 0.372                     | 5.256    | 1.47E-07     |
| Age of HD Onset   | 0.036            | 8.980    | 2.71E-19     | 1.168                    | 1.205    | 0.031                     | 7.455    | 8.99E-14     |
| <b>Model 3</b>    |                  |          |              |                          |          |                           |          |              |
| <b>Variable</b>   | <b>log HR</b>    | <b>z</b> | <b>p val</b> | <b>log HR</b>            | <b>Z</b> | <b>log HR</b>             | <b>z</b> | <b>p val</b> |
| CAG (per repeat)  | 0.123            | 9.157    | 5.34E-20     | 1.069                    | 1.136    | 0.115                     | 8.043    | 8.88E-16     |
| Age of HD Onset   | 0.070            | 5.677    | 1.37E-08     | 1.080                    | 1.116    | 0.065                     | 5.088    | 3.61E-07     |
| Age of HD Onset'  | -0.119           | -4.494   | 6.99E-06     | 1.016                    | 0.981    | -0.117                    | -4.585   | 4.53E-06     |
| Age of HD Onset'' | 0.575            | 5.167    | 2.38E-07     | 0.934                    | 0.959    | 0.616                     | 5.389    | 7.07E-08     |
| Men vs Women      | 2.297            | 3.972    | 7.13E-05     | 0.983                    | 1.026    | 2.335                     | 3.869    | 1.09E-04     |
| CAG by (M vs W)   | -0.042           | -3.323   | 8.91E-04     | 0.984                    | 1.025    | -0.043                    | -3.240   | 1.19E-03     |

*Simulation ratios* are the mean parameters over 1000 simulations divided by the parameter estimate obtained from the original data.

Abbreviations: *HR* = hazard ratio, *S.E* = standard error, *CI* = confidence interval, *p val* = p value, *M* = men, *W* = women. In p values, *XE-Y* indicates *X* times 10 to the *-Y* power (scientific notation). For age of HD onset in Model 3, restricted cubic spline knots were placed at the quantiles (.05, .35, .65, .95) of age of onset. In the original data these quantiles correspond to 23.05, 40.00, 50.00 and 65.00 years of age. These values varied among the simulations, due to adding random noise to the ages of onset. *Age of HD Onset'* and *Age of HD Onset''* are the nonlinear restricted cubic spline coefficients for age of HD onset.

## The Registry investigators of the European Huntington's Disease Network

Registry Steering committee: G. Bernhard Landwehrmeyer (PI), Anne-Catherine Bachoud-Lévi, Anna-Rita Bentivoglio, Ida Biunno, Raphael M. Bonelli, Juliana Bronzova, Jean-Marc Burgunder, Stephen B. Dunnett, Joaquim J. Ferreira, Jan Frich, Joe Giuliano, Olivia J. Handley, Arvid Heiberg, Sergey Illarioshkin, Torsten Illmann, Jiri Klempir, Jamie Levey, Tim McLean, Jørgen E. Nielsen, Susana Pro Koivisto, Markku Päivärinta, Sven Pålhagen, Oliver Quarrell, Maria Ramos-Arroyo, Raymund A.C. Roos, Carsten Saft, Ana Rojo Sebastián, Sarah J. Tabrizi, Wim Vandenberghe, Christine Verellen-Dumoulin, Tereza Uhrova, Jan Wahlström+, Jacek Zaremba Language coordinators: Verena Baake (formerly Rödiger), Katrin Barth, Monica Bascuñana Garde, Kristina Becanovic, Tomáš Bernard, Sabrina Betz, Reineke Bos, Adrien Come, Leonor Correia Guedes, Jenny Callaghan, Selene Capodarca, Sébastien Charpentier, Wildson Vieira da Silva, Martina Di Renzo, Daniel Ecker, Ana Maria Finisterra,, Ruth Fullam, Camille Genoves, Mette Gilling, Olivia J Handley, Andrea Horta, Carina Hvalstedt, Christine Held, Hasina Hussain, Kerstin Koppers, Claudia Lamanna, Matilde Laurà, Asunción Martínez Descals, Saul Martinez-Horta, Tiago Mestre, Sara Minster, Daniela Monza, Kristina Munkel, Lisanne Mütze, Martin Oehmen, Helene Padiou, Laurent Paterski, Nadia Peppia, Susana Pro Koivisto, Beate Rindal, Dawn Rogers, Niini Røren (formerly Heinonen), Ana Salgueiro, Pavla Šašinková, Yury Seliverstov, Catherine Taylor, Erika Timewell, Jenny Townhill, Patricia Trigo Cubillo, Marleen R van Walsem, Marie-Noelle Witjes-Ané, Grzegorz Witkowski, Abigail Wright, Elizaveta Yudina, Daniel Zielonka, Eugeniusz Zielonka, Paola Zinzi Legacy database team: Daisy De Abreu, Gunter Antoneag, Katrin Barth, Sabrina Betz, Jean-Marc Burgunder, Christine Capper-Loup, Luís Garcez Ferreira, Nilza Gonçalves, Torsten Illmann, Raquel Lobo, Jürgen Nagler-Ihle, Eileen Neacy, Ana Teresa Santos, Jan Tuschhoff, Jennifer Ware AUSTRIA Graz (Medizinische Universitäts Graz, Psychiatrie): Raphael M. Bonelli, Karen Hecht, Brigitte Herranhof, Anna Holl (formerly Hödl), Hans-Peter Kapfhammer, Michael Koppitz, Sabine Lilek, Markus Magnet, Nicole Müller, Daniela Otti, Annamaria Painold, Karin Reisinger, Monika Scheibl, Helmut Schöggel, Jasmin Ullah Innsbruck (Universitätsklinik Innsbruck, Neurologie): Eva-Maria Braunwarth, Florian Brugger, Lisa Buratti, Eva-Maria Hametner, Caroline Hepperger, Christiane Holas, Anna Hotter, Anna Hussl, Barbara Larcher, Philipp Mahlknecht, Christoph Müller, Bernadette Pinter, Werner Poewe, Eva-Magdalena Reiter, Klaus Seppi, Fabienne Sprenger, Gregor Wenning Salzburg (Christian-Doppler-Klinik Salzburg, Universitätsklinikum der PMU, Universitätsklinik für Neurologie): Raphael M. Bonelli, Gunther Ladurner, Stefan Lilek, Daniela Sinadinosa, Wolfgang Staffen, Anna Maria Walleczek Vienna-UNI: Christoph Linder, Walter Pirker BELGIUM Bierbeek: Dirk Liessens, Godelinde Calmeyn, Nele Somers, Isabelle Delvaux, Andrea Boogaerts Bruxelles (Vrije Universiteit Brussel): Anja Flamez, Sylvie de Raedt REGISTRY contributors 2014-2017 Page 2 of 11 Oberer Eselsberg 45/1 · 89081 Ulm · Germany Phone +49 (0)731 500-63101 · Fax +49 (0)731 500-63082 · www.euro-hd.net Bruxelles (Erasmus) : Nick Alaerts, Hichem Slama, Frédéric Supiot Bruxelles (St-Luc) : Eric Constant, Anne-Françoise Gillardin, Marie-Claude Léonard, Christine Verellen-Dumoulin, Françoise van de Wyngaerde Charleroi (Institut de Pathologie et de Génétique (IPG)): Michel Dupuis, Cécile Minet, Pascale Ribai, Dominique Van Paemel, Christine Verellen-Dumoulin Leuven (Universitair Ziekenhuis Gasthuisberg): Andrea Boogaerts, Wim Vandenberghe, Dimphna van Reijen, Petra Weckx CZECH REPUBLIC Olomouc (Neurologická klinika, Fakultní nemocnice Olomouc): Michaela Kaiserova, Zuzana Šenkárová Prague (Extrapyramidové centrum, Neurologická klinika, 1. LF UK a VFN): Ondřej Bezdíček, Jiří Klempíř, Olga Klempířová, Veronika Majerová-Ibarburu, Tomáš Nikolai, Jan Roth,

Irena Stárková DENMARK Aarhus (Aarhus University Hospital): Louise Hasselstrøm Madsen, Anette Torvin Møller Copenhagen University Hospital (Rigshospitalet, Memory clinic): Lena Hjermind, Oda Jacobsen, Ida Unmack Larsen, Suzanne Lindquist, Jørgen Nielsen, Lisbeth Regeur, Peter Roos, Jette Stockholm, Christina Vangsted-Hansen, Tua Vinther-Jensen Odense (Odense University Hospital): Annette Lolk, Marianne Lundsgaard, Lene Wermuth FINLAND Aland: Christian Andersson, Clara Nyberg, Jimmy Sundblom Helsinki - Vaestoliitto (Department of Medical Genetics): Maarit Peippo, Marjatta Sipponen Kuopio: Anu Bruun, Paivi Hartikainen, Seija Mäkipää, Mari Ollokainen Oulu (Dep. of Neurology): Jaana Åman, Mikko Kärppä Oulu (Dep. of Medical Genetics): Jaakko Ignatius, Outi Jääskeläinen, Outi Kajula, Jukka Moilanen, Aki Mustonen Tampere (Terveystalo Healthcare Service Centre): Maire Santala Turku-Suvituuli (Rehabilitation Centre Suvituuli): Pia Eklund, Heli Hiivola, Hannele Hyppönen, Kirsti Martikainen, Marjut Ojala, Sirkku Tähkäpää, Katri Tuuha FRANCE Angers (Centre de référence des maladies neurogénétique- CHU d'Angers): Philippe Allain, Dominique Bonneau, Marie Bost, Bénédicte Gohier, Marie-Anne Guérid, Audrey Olivier, Julie Prouzet, Adriana Prundean, Clarisse Scherer-Gagou, Christophe Verny Bordeaux (Hôpital Pellegrin): Blandine Babiloni, Déborah Bled, Sabrina Debruxelles, Charlotte Duché, Sonia Fraisse, Cyril Goizet, Laetitia Jameau, Danielle Lafoucrière, Umberto Spampinato REGISTRY contributors 2014-2017 Page 3 of 11 Oberer Eselsberg 45/1 · 89081 Ulm · Germany Phone +49 (0)731 500-63101 · Fax +49 (0)731 500-63082 · www.euro-hd.net Clermont-Ferrand (Hôpital Gabriel Montpied): Julien Couttier, Bérengère Debilly, Christine Delaigue, Philippe Derost, Franck Durif, Véronique Germain, Perrine Legendre, Sylvie Loiseau, Ana Marques, Miguel Ulla, Tiphaine Vidal Creteil (Hôpital Henri Mondor): Anne-Catherine Bachoud-Lévi, Farideh Badei, Marie-Françoise Boissé, Lotfi Boudali, Laurent Cleret de Langavant, Laurie Lemoine, Graca Morgado, Katia Youssov Lille-Amiens: Lille (CHRU Roger Salengro): Agnès Annic, Recka Barthélémy, Christelle De Bruycker, Maryline Cabaret, Anne-Sophie Carette, Nicolas Carrière, Eric Decorte, Luc Defebvre, Marie Delliaux, Arnaud Delval, Alizé Depelchin, Alain Destee, Nelly Dewulf-Pasz, Thibaut Dondaine, Florence Dugauquier, Kathy Dujardin, Lucie Hopes, Pierre Krystkowiak, Marie-Hélène Lemaire, Sylvie Manouvrier, Eugénie Mutez, Mireille Peter, Lucie Plomhouse, Bernard Sablonnière, Clémence Simonin, Céline Tard, Stéphanie Thibault-Tanchou, Isabelle Vuillaume Amiens (CHU Sud): Marcellin Bellonet, Stéphanie Blin, Simone Chen, Pierre Krystkowiak, Kamel Masmoudi, Gilles Morin, Martine Roussel, Mélissa Tir, Béatrice Schüler, Sandrine Wannepain, Yassine Zouitina Marseille (Hôpital La Timone): Jean-Philippe Azulay, Marie Delfini, Alexandre Eusebio, Frédérique Fluchere, Aicha Guenam, Laura Mundler, Karine Nguyen Paris (Hôpital de la Pitié Salpêtrière): Sandra Benaich, Alexis Brice, Sarah Boster, Perrine Charles, Alexandra Durr, Claire Ewencyk, Hélène Francisque, Céline Jauffret, Damian Justo, Abdulrahman Kassar, Stephan Klebe, Fabien Lesne, Paolo Milani, Marie-Lorraine Monin, Tiffany Monnier, Emmanuel Roze, Alina Tataru, Maya Tchikviladzé Rouen (Hôpital Charles Nicolle): Sandrine Bioux, Evangeline Blioux, Carole Girard, Lucie Guyant-Maréchal, Didier Hannequin, Véronique Hannier, Séverine Jourdain, David Maltête, Dorothée Pouliquen Strasbourg (Hôpital Civil): Mathieu Anheim, Nadia Barun, Ouhaïd Lagha-Boukbiza, Nadine Longato, Christophe Marcel, Clélie Phillipps, Gabrielle Rudolf, Gisèle Steinmetz, Christine Tranchant, Caroline Wagner, Marie-Agathe Zimmermann Toulouse (Hôpital Purpan): Leily Blondeau, Fabienne Calvas, Samia Cheriet, Hélène Delabaere, Jean-François Demonet, Laurent Marquine, Jérémie Pariente, Michèle Pierre, Elsa Pomies, Sandrine Rolland, Corinne Souyris GERMANY Aachen (Universitätsklinikum Aachen, Neurologische Klinik): Christoph Michael Kosinski, Eva Milkereit, Daniela Probst, Kathrin Reetz, Christian Sass, Johannes Schiefer, Christiane Schlangen, Cornelius J. Werner Berlin (Universitätsmedizin

Berlin, Klinik und Poliklinik für Neurologie): Markus Beuth, Harald Gelderblom, Josef Priller, Harald Prüß, Eike Spruth, Silvia Thiel Bochum (Huntington-Zentrum (NRW) Bochum im St. Josef-Hospital): Jürgen Andrich, Gisa Ellrichmann, Lennard Herrmann, Rainer Hoffmann, Barbara Kaminski, Peter Kraus, Carsten Saft, Christiane Stamm Bremen: Christos Ganos, Lars Stubbe, Vera Tadic, Jennifer Tübing Dinslaken (Reha Zentrum in Dinslaken im Gesundheitszentrums Lang): Herwig Lange Dresden (Universitätsklinikum Carl Gustav Carus an der Technischen Universität Dresden, Klinik und Poliklinik für Neurologie): Cecile Bosredon, Ulrike Hunger, Matthias REGISTRY contributors 2014-2017 Page 4 of 11 Oberer Eselsberg 45/1 · 89081 Ulm · Germany Phone +49 (0)731 500-63101 · Fax +49 (0)731 500-63082 · www.euro-hd.net Löhle, Antonia Maass, Christiana Ossig, Simone Schmidt, Alexander Storch, Annett Wolz, Martin Wolz Erlangen (Universitätsklinikum Erlangen, Molekulare Neurologie und Klinik für Neurologie): Zacharias Kohl, Christina Kozay, Jasmin Ullah, Jürgen Winkler Freiburg (Universitätsklinik Freiburg, Neurologie): Ulrike Bergmann, Regina Böringer, Philipp Capetian, Gerit Kammel, Johann Lambeck, Miriam Mächtel, Simone Meier, Michel Rijntjes, Birgit Zucker Hamburg (Universitätsklinikum Hamburg-Eppendorf, Klinik und Poliklinik für Neurologie): Kai Boelmans, Christos Ganos, Ines Goerendt, Walburgis Heinicke, Ute Hidding, Jan Lewerenz, Alexander Münchau, Michael Orth, Jenny Schmalfeld, Lars Stubbe, Simone Zittel Hannover (Neurologische Klinik mit Klinischer Neurophysiologie, Medizinische Hochschule Hannover): Gabriele Diercks, Dirk Dressler, Flverly Francis, Sabine GaydeStephan, Heike Gorzolla, Bianca Kramer, Rebecca Minschke, Christoph Schrader, Pawel Tacik Itzehoe (Schwerpunktpraxis Huntington, Neurologie und Psychiatrie): Michael Ribbat+ Marburg KPP (Klinik für Psychiatrie und Psychotherapie Marburg-Süd): Bernhard Longinus Marburg UNI (Universitätsklinik Marburg, Sprechstunde für choreatiforme Bewegungsstörungen): Carsten Möller, Katrin Bürk München (Huntington-Ambulanz im Neuro-Kopfzentrum - Klinikum rechts der Isar der Neurologischen Klinik und Poliklinik der Technischen Universität München): Antje Lüsebrink, Mark Mühlau, Alexander Peinemann, Michael Städtler, Adolf Weindl, Juliane Winkelmann, Cornelia Ziegler Münster (Universitätsklinikum Münster, Klinik und Poliklinik für Neurologie): Natalie Bechtel, Heike Beckmann, Stefan Bohlen, Nicole Göpfert, Eva Hölzner, Herwig Lange, Ralf Reilmann, Stefanie Rohm, Silke Rumpf, Christian Sass, Sigrun Schepers, Nathalia Weber Taufkirchen (Isar-Amper-Klinikum - Klinik Taufkirchen (Vils)): Michael Bachmeier, Matthias Dose, Nina Hofstetter, Ralf Marquard, Alzbeta Mühlbäck Ulm (Universitätsklinikum Ulm, Neurologie): Katrin Barth, Andrea Buck, Julia Connemann, Daniel Ecker, Carolin Geitner, Christine Held, Andrea Kesse, Bernhard Landwehrmeyer, Franziska Lezius, Jan Lewerenz, Solveig Nepper, Anke Niess, Michael Orth, Ariane Schneider, Daniela Schwenk, Sigurd Süsmuth, Sonja Trautmann, Melanie Vogel, Patrick Weydt Würzburg (Universitätsklinikum Würzburg, Neurologie): Stephan Klebe, Thomas Musacchio, Christine Leypold, Kerstin Nöth ITALY Bari (Neurophysiopathology of Pain Unit, Basic Medical, Neuroscience and Sensory System Department, University of Bari): Claudia Cormio, Olimpia Difruscolo, Giovanni Franco, Angela Nuzzi, Vittorio Scirucchio, Claudia Serpino, Marina de Tommaso Bologna (DIBINEM - Alma Mater Studiorum - Università di Bologna, IRCCS Istituto delle Scienze Neurologiche di Bologna): Giovanna Calandra-Buonaura, Sabina Capellari, Pietro Cortelli, Roberto Gallassi, Roberto Poda, Cesa Scaglione Brescia (Division of Biology and Genetics, Department of Molecular and Translational Medicine & Division of Neurology, Department of Clinical and Experimental Sciences, REGISTRY contributors 2014-2017 Page 5 of 11 Oberer Eselsberg 45/1 · 89081 Ulm · Germany Phone +49 (0)731 500-63101 · Fax +49 (0)731 500-63082 · www.euro-hd.net University of Brescia): Chiara Agosti, Sergio Barlati, Silvia Compostella, Eleonora Marchina, Alessando Padovani Cagliari (Movement Disorders Center,



Department of Neurology, Institute of Neurology, University of Cagliari): Michela Figorilli, Francesco Marrosu, Antonella Muroli, Valeria Piras, Melisa Vacca Florence (Department of NEUROFARBA, University of Florence & Careggi University Hospital, IRCSS " Don Gnocchi "): Elisabetta Bertini, Caterina Bartoli, Fernanda Fortunato, Elena Ghelli, Andrea Ginestroni, Claudia Mechi, Marco Paganini, Silvia Piacentini, Silvia Pradella, Anna Maria Romoli, Sandro Sorbi Genoa (Department of Neuroscience, Rehabilitation, Ophthalmology, Genetics, Maternal and Child Health, University of Genova): Giovanni Abbruzzese, Monica Bandettini di Poggio, Giovanna Ferrandes, Paola Mandich, Roberta Marchese, Emilio Di Maria, Tiziano Tamburini Milan (SODS Genetica delle Malattie Neurodegenerative e Metaboliche & U.O. Neurologia, Fondazione IRCCS Istituto Neurologico Carlo Besta): Alberto Albanese, Simona Castagliuolo, Anna Castaldo, Stefano Di Donato, Daniela Di Bella, Cinzia Gellera, Silvia Genitrini, Caterina Mariotti, Daniela Monza, Lorenzo Nanetti, Marta Panzeri, Dominga Paridi, Paola Soliveri, Francesca Spagnolo, Franco Taroni, Chiara Tomasello Naples (Department of Neurosciences and Reproductive and Odontostomatological Sciences, Federico II University of Naples): Giuseppe De Michele, Luigi Di Maio, Carlo Rinaldi, Marco Massarelli, Silvio Peluso, Alessandro Roca, Cinzia Valeria Russo, Elena Salvatore, Pierpaolo Sorrentino, Tecla Tucci Pozzilli (IS) (IRCCS Neuromed): Milena Cannella, Valentina Codella, Francesca De Gregorio, Annunziata De Nicola, Francesca Elifani, Chiara Esposito, Tiziana Martino, Irene Mazzante, Martina Petrollini, Maria Simonelli, Maurizio Vezza IRCCS Casa Sollievo della Sofferenza, San Giovanni Rotondo: Ferdinando Squitieri Rome (LIRH Foundation): Barbara D'Alessio, Francesca Lovo Rome (Department of Neurology, Università Cattolica del Sacro Cuore; Institute of Translational Pharmacology & Institute of Cognitive Sciences and Technologies, National Research Council of Italy): Anna Rita Bentivoglio, Francesco Bove, Claudio Catalli, Raffaella Di Giacomo, Alfonso Fasano, Marina Frontali, Arianna Guidubaldi, Tamara Ialongo, Gioia Jacopini, Giovanna Loria, Anna Modoni, Martina Petracca, Carla Piano, Piccininni Chiara, Davide Quaranta, Silvia Romano, Francesco Soleti, Marcella Solito, Maria Spadaro, Flavia Torlizzi, Paola Zinzi Rome (Azienda Ospedaliera Sant'Andrea; Department of Neuroscience, Mental Health and Sensory Organs (NESMOS), Faculty of Medicine and Psychology, Sapienza University of Rome; Institute of Translational Pharmacology & Institute of Cognitive Sciences and Technologies, National Research Council of Italy): Giulia Coarelli, Michela Ferraldeschi, Marina Frontali, Gioia Jacopini, Giovanni Ristori, Silvia Romano, Paola Zinzi NETHERLANDS Enschede (Medisch Spectrum Twente): Monique S.E. van Hout, Jeroen P.P. van Vugt, A. Marit de Weert, Marloes Verhoeven Groningen (Polikliniek Neurologie): Meike Dekker, Jesper Klooster, Nico Leenders, Joost van Oostrom, Berry Kremer REGISTRY contributors 2014-2017 Page 6 of 11 Oberer Eselsberg 45/1 · 89081 Ulm · Germany Phone +49 (0)731 500-63101 · Fax +49 (0)731 500-63082 · www.euro-hd.net Leiden (Leiden University Medical Centre (LUMC)): Verena Baake, Simon J. A. van den Bogaard, Reineke Bos, Eve M. Dumas, Ellen P. 't Hart, Marye Hogenboom, Milou Jacobs, Caroline Jurgens, Anne Kampstra, Raymund A.C. Roos, Anne Schoonderbeek, Marie-Noëlle Witjes-Ané Maastricht: Annelien Duits, Mayke Oosterloo, Mirella Waber Nijmegen (Universitair Medisch Centrum St. Radboud, Neurology): Berry Kremer, Carla Verstappen NORWAY Bergen (Haukeland University Hospital, Dept of Medical Genetics and Olaviken Psychiatric Hospital): Ellen Økland Blinkenberg. (NKS Olaviken`s HD clinic): Erik Hauge, Hilde Tyvoll Oslo University Hospital (Dept. of Medical Genetics, Dept. of Neurology, Dept.of Neurorehabilitation): Olaf Aaserud, Nils Olaf Aanonsen, Kathrine Bjørgo, Nancy Borgerød, Elisabeth Dramstad, Madeleine Fannemel, Jan C. Frich, Per F. Gørvell, Kathrine Haggag, Cecilie Haggag Johannessen, Arvid Heiberg, Lars Retterstøl, Oddveig Røsby, Jutta Rummel, Alma Sikiric, Bodil

Stokke, Marleen van Walsem, Ragnhild Wehus Trondheim (St. Olavs Hospital): Vibeke Arntsen, Inga Bjørnevoll, Sigrid Botne Sando, Marte Gjøøl Haug, Hanna Haugan Størseth, Rune Østern, Julie Paulsen

POLAND Gdansk (St. Adalbert Hospital, Gdansk, Medical University of Gdansk, Neurological and Psychiatric Nursing Dpt.): Artur Dziadkiewicz, Agnieszka Konkel, Ewa Narożańska, Malgorzata Nowak, Piotr Robowski, Emilia Sitek, Jaroslaw Slawek, Witold Soltan, Michal Szinwelski Katowice (Medical University of Silesia, Katowice): Michał Arkuszewski, Magdalena Błaszczyk, Magdalena Boczarska-Jedynak, Ewelina Ciach-Wysocka, Agnieszka Gorzkowska, Barbara Jasińska-Myga, Aleksandra Kaczmarczyk, Gabriela Kłodowska – Duda, Grzegorz Opala, Monika Rudzińska, Daniel Stompel Krakow (Krakowska Akademia Neurologii): Krzysztof Banaszekiewicz, Dorota Boćwińska, Kamila Bojakowska-Jaremek, Małgorzata Dec, Natalia Grabska, Malgorzata Krawczyk, Ewelina Kubowicz, Michalina Malec-Litwinowicz, Monika Rudzińska, Agata Stenwak, Andrzej Szczudlik, Elżbieta Szczygieł, Magdalena Wójcik, Anna Wasielewska Poznan (Poznan University of Medical Sciences, Poland): Jacek Anioła Anna Bryl, Anna Ciesielska, Aneta Klimberg, Jerzy Marcinkowski, Husam Samara, Justyna Sempołowicz, Bartłomiej Wiśniewski, Daniel Zielonka Warsaw-MU (Medical University of Warsaw, Neurology): Anna Gogol (formerly Kalbarczyk), Piotr Janik, Zygmunt Jamrozik, Anna Kaminska, Hubert Kwiecinski+ Warsaw-IPiN (Institute of Psychiatry and Neurology Dep. of Genetics, First Dep. of Neurology): Jakub Antczak, Katarzyna Jachinska, Wioletta Krysa, Maryla Rakowicz, Rafal Rola, Danuta Ryglewicz, Halina Sienkiewicz-Jarosz, Iwona Stępnia, Anna Sułek, Grzegorz Witkowski, Jacek Zaremba, Elzbieta Zdzienicka, Karolina Ziora-Jakutowicz

PORTUGAL Coimbra – (Hospital Universitário de Coimbra): Cristina Januário, Filipa Júlio

REGISTRY contributors 2014-2017 Page 7 of 11 Oberer Eselsberg 45/1 · 89081 Ulm · Germany Phone +49 (0)731 500-63101 · Fax +49 (0)731 500-63082 · www.euro-hd.net

Lisbon-Central (Hospital dos Capuchos, Centro Hospitalar Lisboa Central): Manuel Almeida, Ana Calado, Margarida Dias, Joana Morgado, Cristina Semedo Lisbon-HSM (Hospital de Santa Maria, Clinical Pharmacology Unit, Instituto de Medicina Molecular): Leonor Correia Guedes, Miguel Coelho, Joaquim J Ferreira, Andreia Magalhães, Tiago Mestre, Tiago Mendes, Dulce Neutel, Filipe Rodrigues, Anabela Valadas

Lisbon-HFF (Hospital Fernando da Fonseca): Cristina Costa, Helena Cardoso, Tiago Mendes, Mariana Santos

Porto-HGSA (Hospital Santo António- Centro Hospitalar do Porto): Gonçalo Cação, Sara Cavaco, Joana Damásio, Joana Fernandes, Alexandra Gonçalves, Rui Loureiro, Inês Moreira, Marina Magalhães, Paula Salgado

Porto- HSJ (Hospital de São João): Carlos Andrade, Andreia Costa, Carolina Garrett, Miguel Gago, Joana Guimarães, João Massano, Joana Meireles, Ana Monteiro

RUSSIAN FEDERATION Kazan: Diana Khasanova, Zuleykha Zalyalova Moscow – (Research Center of Neurology): Sergey Illarioshkin, Sergey Klyushnikov, Olga Sidorova, Oleg Smirnov, Elizaveta Yudina, Yury Seliverstov

Nizhny Novgorod – (Nizhny Novgorod Medical Academy, Neurology Department): Victoria Antonova, Svetlana Kopishinskaya, Maria Korotysh

Ufa – (Bashkir State Medical University, Department of Neurology, Neurosurgery, and Medical Genetics): Rim Magzhanov, Elena Saifullina

Voronezh: Sergey Kurbatov

SPAIN Alicante-Alcoy (Hospital Virgen de los Lirios): Pilar Solis Badajoz (Hospital Infanta Cristina): Carmen Durán Herrera, Patrocinio Garcia Moreno

Barcelona-Bellvitge (Hospital Universitari de Bellvitge): Jordi Bas, Núria Busquets, Matilde Calopa, Serge Jaumà Classen, Nadia Rodríguez Dedichá

Barcelona- Clínic i Provincial (Hospital Clínic i Provincial): María Teresa Buongiorno, Andrés de la Cerda Santa María, Esteban Muñoz, Pilar Santacruz

Barcelona-Hospital Mútua de Terrassa: Miquel Aguilar Barbera, Ana Rojo Sebastián, Sonia Arribas Pardo, Dolors Badenes Guia, Noemi Calzado, Laura Casas Hernanz, Juan Pablo Tartari Díaz-Zorita, Judit López Catena, Pilar Quiléz Ferrer, Gemma Tome Carruesco

Barcelona-Merced (Hospital Mare de Deu de La Merced):

Misericordia Floriach Robert, Cèlia Mareca Viladrich, Elvira Roca, Jesús Miguel Ruiz Idiago, Antonio Villa Riballo Barcelona-Santa Cruz y San Pablo (Hospital de la Santa Creu i Sant Pau): Antonia Campolongo, Ramon Fernandez de Bobadilla, Andrea Horta, Jaime Kulisevsky Bojarsky, Saul Martinez-Horta, Javier Pagonabarraga, Jesus Perez Perez, Roser Ribosa, Carolina Villa Bilbao (Hospital de Cruces): Maria Angeles Acera Gil, Koldo Berganzo Corrales, Juan Carlos Gomez Esteban, Amaia González, Beatriz Tijero Merino Burgos (Servicio de Neurología Hospital General Yagüe): Esther Cubo, Cecilia Gil Polo, Natividad Mariscal, Jesús Sánchez REGISTRY contributors 2014-2017 Page 8 of 11 Oberer Eselsberg 45/1 · 89081 Ulm · Germany Phone +49 (0)731 500-63101 · Fax +49 (0)731 500-63082 · www.euro-hd.net Canarias (Hospital Insular de Gran Canaria): Sandra Gutierrez Romero, José Matías Arbelo, Rocío Malo de Molina, Ildaira Martín, Juan Manuel Periañez, Beatriz Udaeta Fuenlabrada (Hospital Universitario): Fernando Alonso-Frech, María del Valle Loarte Granada (Hospital Universitario San Cecilio, Neurología): Francisco Barrero, Blas Morales Madrid-BTCIEN (Fundación CIEN): Belén Frades, Marina Ávila Villanueva, Maria Ascension Zea Sevilla Madrid-Clínico (Hospital Clínico Universitario San Carlos): María del Mar Fenollar, Rocío García-Ramos García, Clara Villanueva Madrid RYC (Hospital Ramón y Cajal, Neurología): Mónica Bascuñana, Marta Fatás Ventura, Juan García Caldentey, Guillermo García Ribas, Justo García de Yébenes, José Luis López-Sendón Moreno, Verónica Mañanes Barral, Patricia Trigo Cubillo Madrid FJD (Madrid-Fundación Jiménez Díaz): Cici Feliz, Pedro José García Ruíz, Ana García, Juan García Caldentey, Rosa Guerrero López, Antonio Herranz Bárcenas, Asunción Martínez-Descals, Angel Martínez Pueyo, Veronica Puertas Martin, Noelia Rodríguez Martínez, Teresa Montojo, María José Sainz Artiga, Vicenta Sánchez Murcia (Hospital Universitario Virgen de la Arrixaca): María Dolores Alarcón, Carmen Antúnez Almagro, Esther Diéguez, Lorenza Fortuna, Agustina Legaz, Salvadora Manzanares, Juan Marín Muñoz, María Martirio Antequera Torres, Fuensanta Noguera Perea, Laura Vivancos Oviedo (Hospital Central de Asturias): Sonia González, Luis Menéndez Guisasola, Marta Para Prieto, René Ribacoba, Carlos Salvador, Pablo Sánchez Lozano Palma de Mallorca (Hospital Universitario Son Espases): Juan García Caldentey, Inés Legarda Ramirez, Dolors Moragues Benito, Penelope Navas Arques, Monica Rodriguez Lopera, Barbara Vives Pastor Pamplona (Complejo Hospitalario de Navarra): Itziar Gaston, Fermin Garcia-Amigot, Maria Dolores Martinez-Jaurrieta, Maria Antonia Ramos-Arroyo Sevilla (Hospital Universitario Virgen del Rocío): Astrid Adarmes, Maravilla BernalEscudero, Fátima Carrillo, Silvia Jesús, Pablo Mir, Laura Vargas-González Sevilla (Hospital Virgen Macarena): Fátima Damas Hermoso, José Manuel García Moreno, Javier Abril Jaramillo, Carolina Mendez Lucena, Eva María Pacheco Cortegana, José Chacón Peña, Luis Redondo, Violeta Sánchez Sánchez Sevilla (Residencia Santa Ana): Cristina Melgar Fernandez, María Dolores Romero Lemos, Maite Paredes Mata, Rocío Villagrán Casado Valencia (Hospital la Fe): Maria Bosca, Juan Andres Burguera, Francisco Castera Brugada, Jose Maria Millán Salvador, Carmen Peiró Vilaplana, Pilar Solís, Begoña Jeweinat Figuerola, Paloma Millan Palanca Zaragoza (Hospital Clínico): Elena Bellosta Diago, Javier López del Val, Laura Martinez Martinez, Elena López SWEDEN Göteborg (Sahlgrenska University Hospital): Jan Wahlström+, Ulrika Høsterey-Ugander, Gunnel Fredlund, Radu Constantinescu, Kajsa Lewin, Liselotte Neleborn-Lingefjärd, Maria Berglund, Peter Berglund, Petra Linnsand REGISTRY contributors 2014-2017 Page 9 of 11 Oberer Eselsberg 45/1 · 89081 Ulm · Germany Phone +49 (0)731 500-63101 · Fax +49 (0)731 500-63082 · www.euro-hd.net Lund (Dept Neurology, Skånes Universityhospital): Åsa Petersén, Jan Reimer, Håkan Widner Stockholm-Ersta: Mouna Esmaeilzadeh, Joakim Tedroff, Elisabeth Winnberg Stockholm Karolinska University Hospital: Stanislav Benaminov, Elisabeth Björnsson, Daniel Merrick, Martin Paucar, Sven Pålhagen, Per

Svenningsson, Tina Wallden Umeå (Umeå University Hospital): Måns Berglund, Ghada Loutfi, Carina Olofsson, EvaLena Stattin, Laila Westman, Birgitta Wikström Uppsala University Hospital: Camilla Ekwall, Marie-Lousie Göller, Anders Johansson, Valter Niemelä, Dag Nyholm, Jimmy Sundblom, Leif Wiklund SWITZERLAND Bern: Jean-Marc Burgunder, Jessica Koehli, Yanik Stebler (Swiss HD Zentrum), Alain Kaelin, Irene Romero, Michael Schüpbach, Sabine Weber Zaugg (Zentrum für Bewegungsstörungen, Neurologische Klinik und Poliklinik, Universität Bern) Lausanne: Federica Esposito, Jean-Marc Good, Karin Paus, Francois Vingerhoets, Christian Wider+ Zürich (University Hospital and University of Zurich): Hans H. Jung, Jens A. Petersen, Maria Ligon-Auer, Violeta Mihaylova U.K. Aberdeen (NHS Grampian Clinical Genetics Centre & University of Aberdeen): Lorna Downie, Roisin Jack, Kirsty Matheson, Zosia Miedzbrodzka, Daniela Rae, Sheila A Simpson, Fiona Summers, Alexandra Ure, Vivien Vaughan Barnstaple: Timothy Harrower, Nathan Vernon Birmingham (The Barberry Centre, Dept of Psychiatry): Shahbana Akhtar, Jenny Crooks, Adrienne Curtis, Jenny de Souza (Keylock), John Piedad, Hugh Rickards, Jan Wright Blanford Forum: Diane Haig-Brown, Janet Craven, Andrew Pallett, Steve Simpson, Rebecca Weekes Bristol (North Bristol NHs Trust, Southmead hospital): Elizabeth Coulthard, Louise Gethin, Beverley Hayward, Kasia Sieradzan, Abigail Wright Cambridge (Cambridge Centre for Brain Repair, Forvie Site): Roger A. Barker, Deidre O'Keefe, Anna Gertiz (nee Di Pietro), Kate Fisher, Anna Goodman, Susan Hill, Sarah Mason, Rachel Swain, Natalie Valle Guzman Cardiff (Schools of Medicine and Biosciences, Cardiff University): Jonathan Bisson, Monica Busse, Cynthia Butcher, Rebecca Cousins, Jenny Callaghan, Stephen Dunnett, Catherine Clenaghan, Ruth Fullam, Sarah Hunt, Lesley Jones, Una Jones, Hanan Khalil, Sara Minster, Michael Owen, Kathleen Price, Jenny Townhill, Anne Rosser Dundee (Scottish Huntington's Association, Ninewells Hospital): David Goudie, Lindsay Buchanan, Paula McFadyen, Alison Tonner, Anne-Marie Taylor Edinburgh (SE Scotland Genetic Service, Western General Hospital): Maureen Edwards, Carrie Ho (Scottish Huntington's Association), Marie McGill, Mary Porteous, Pauline Pearson REGISTRY contributors 2014-2017 Page 10 of 11 Oberer Eselsberg 45/1 · 89081 Ulm · Germany Phone +49 (0)731 500-63101 · Fax +49 (0)731 500-63082 · www.euro-hd.net Exeter (Department of Neurology Royal Devon and Exeter Foundation Trust Hospital): Timothy Harrower, Sarah Irvine Fife (Scottish Huntington's Association Whyteman's Brae Hospital): Peter Brockie, Jillian Foster, Nicola Johns, Sue McKenzie, Jean Rothery, Gareth Thomas, Shona Yates Forth\_Valley (Neurology Department, Forth Valley Royal Hospital): Christian Neumann, Kirsten Patterson, David Thomson Glasgow (Glasgow HD Management Clinic, Southern General Hospital): Catherine Deith, Jane Ireland, Stuart Ritchie Gloucester (Department of Neurology Gloucestershire Royal Hospital): Pauline Brown, Liz Burrows, Amy Fletcher, Alison Harding, Kaye Harrison, Fiona Laver, Mark Silva, Aileen Thomson Hull (Castle Hill Hospital): Carol Chu, Carole Evans, Deena Gallentree, Stephanie Hamer, Alison Kraus, Ivana Markova, Ashok Raman, Liz Rowett Launceston (Millaton Court): Alyson Andrew, Julie Frost, Rupert Noad Leeds (Chapel Allerton Hospital, Department of Clinical Genetics): Jeremy Cosgrove, Deena Gallantree, Stephanie Hamer, Emma Hobson, Stuart Jamieson, Alison Kraus, Mandy Longthorpe, Ivana Markova, Hannah Musgrave, Caroline Peacy, Ashok Raman, Liz Rowett, Jean Toscano, Sue Wild, Pam Yardumian Leicester (Leicestershire Partnership Trust, Mill Lodge): Carole Clayton, Heather Dipple, Dawn Freire-Patino, Caroline Hallam, Julia Middleton Liverpool (Walton Centre for Neurology and Neurosurgery): Sundus Alusi, Rhys Davies, Kevin Foy, Emily Gerrans, Louise Pate London (St. Georges-Hospital): Uruj Anjum, Jan Coebergh, Charlotte Eddy, Nayana Lahiri, Meriel McEntagart, Michael Patton, Maria Peterson, Sarah Rose London (Guy's Hospital): Thomasin Andrews, Andrew Dougherty, Charlotte Golding, Fred Kavalier, Hana Laing,

Alison Lashwood, Dene Robertson, Deborah Ruddy, Alastair Santhouse, Anna Whaite London (The National Hospital for Neurology and Neurosurgery): Thomasin Andrews, Stefanie Gosling (nee Brown), Stefania Bruno, Elvina Chu, Karen Doherty, Charlotte Golding, Salman Haider, Davina Hensman, Nayana Lahiri, Monica Lewis, Marianne Novak, Aakta Patel, Nicola Robertson, Elisabeth Rosser, Sarah Tabrizi, Rachel Taylor, Thomas Warner, Edward Wild London (Royal Hospital for Neuro-disability): Oda Ackermann, Sophie Dupont, Adrienne Scott, Nicholas Stoy, Jenny Vaughn Manchester (Genetic Medicine, University of Manchester, Manchester Academic Health Sciences Centre and Central Manchester University Hospitals NHS Foundation Trust): Natalie Arran, Judith Bek, Jenny Callaghan, David Craufurd, Ruth Fullam, Marianne Hare, Liz Howard, Susan Huson, Liz Johnson, Mary Jones, Ashok Krishnamoorthy, Helen Murphy, Emma Oughton, Lucy Partington-Jones, Dawn Rogers, Andrea Sollom, Julie Snowden, Cheryl Stopford, Jennifer Thompson, Iris Trender-Gerhard, Nichola Verstraelen (formerly Ritchie), Leann Westmoreland Newcastle-upon-Tyne (Centre for Life, Institute of Medical Genetics): Ginette Cass, Lynn Davidson, Jill Davison, Neil Fullerton, Katrina Holmes, Suresh Komati, Sharon McDonnell, Zeid Mohammed, Karen Morgan, Lois Savage, Baldev Singh, Josh Wood Northampton (St Andrew's Healthcare): Elvina Chu, Caroline Knight, Mari O'Neill, Debasish Das Purkayastha REGISTRY contributors 2014-2017 Page 11 of 11 Oberer Eselsberg 45/1 · 89081 Ulm · Germany Phone +49 (0)731 500-63101 · Fax +49 (0)731 500-63082 · www.euro-hd.net Oxford (Oxford University Hospitals NHS Trust, Dept. of Neurosciences, University of Oxford): Andrea H Nemeth, Gill Siuda, Ruth Valentine, Kathryn Dixon, Richard Armstrong Plymouth (Plymouth Huntington Disease Service, Mount Gould Hospital): David Harrison, Max Hughes, Sandra Large, John O Donovan, Amy Palmer, Andrew Parkinson, Beverley Soltysiak, Leanne Timings, Josh Williams Poole (Brain Injury Service, Poole Hospital): John Burn, Rebecca Weekes, Janet Craven, Wendy Bailey, Caroline Coleman, Diane Haig-Brown, Steve Simpson Preston (Neurology Department, Preston Royal Hospital): Marianne Hare, Tahir Majeed, Nicola Verstraelen (Ritchie) Reading (Royal Berkshire Hospital): Richard Armstrong, Kathryn Dixon, Wendy Barrett, Aileen Ho Sheffield (The Royal Hallamshire Hospital– Sheffield Children's Hospital): Oliver Bandmann, Alyson Bradbury, Helen Fairtlough, Kay Fillingham, Isabella Foustanos, Paul Gill, Mbombe Kazoka, Kirsty O'Donovan, Louise Nevitt, Nadia Peppia, Oliver Quarrell, Cat Taylor, Katherine Tidswell Southampton (Southampton General Hospital): Christopher Kipps, Lesley MacKinnon, Veena Agarwal, Elaine Hayward, Kerry Gunner, Kayla Harris, Mary Anderson, Melanie Heywood, Liane Keys, Sarah Smalley Stoke on Trent (Bucknall Hospital): George El-Nimr, Allison Duffell, Sue Wood, Karen Kennedy (nee Smith) Swindon (Victoria Centre, Great Western Hospital): Lesley Gowers, Kingsley Powell, Pamela Bethwaite, Rachel Edwards, Kathleen Fuller, Michelle Phillips EHDN's associate site in Singapore: National Neuroscience Institute Singapore: Louis Tan, Jean-Marc Burgunder, Puay Ngoh Lau, Emmanuel Pica
